# Supplementary material for: Aging Induces Hepatic Oxidative Stress and Nuclear Proteomic Remodeling in Liver from Wistar Rats
Source: MDPI journal article supplement (doi:10.3390/antiox10101535), 2021-09-27
Supplement: s1 [file s1]

## Supplemental Material

Details about the genes used in this study are provided in Supplemental Table S1.

**Supplemental Table S1.** Probes used for real time PCR.

| Gene           | ABI Assay ID  |
|----------------|---------------|
| <i>Sod2</i>    | Rn99999088_g1 |
| <i>Scd-1</i>   | Rn00594894-g1 |
| <i>Fmo3</i>    | Rn00584825_m1 |
| <i>Cyp2c11</i> | Rn01502203_m1 |
| <i>Il-6</i>    | Rn00561420_m1 |
| <i>Il-10</i>   | Rn00563409_m1 |
| <i>Tnf-α</i>   | Rn99999017_m1 |
| <i>Grp78</i>   | Rn01435769_g1 |
| <i>Pdi</i>     | Rn00564459_m1 |
| 18S rRNA       | 4319413E      |

**Supplemental Table S2.** Serum and liver metabolic parameters in 3- and 24-month-old

Wistar rats killed after a 16h and/or 36h fast

|                                 | 3m        |                           | 24m         |                          | 2-Way-ANOVA   |             |             |
|---------------------------------|-----------|---------------------------|-------------|--------------------------|---------------|-------------|-------------|
| Fasting                         | 16 hours  | 36 hours                  | 16 hours    | 36hours                  | Young vs. old | 16h vs. 36h | Interaction |
| Body Weight (g)                 | 325±7     | 329±7                     | 594±19*     | 572±22                   | p<0.0001      | p=0.5271    | p=0.4496    |
| Insulin (ng/mL)                 | 1.3±0.2   | 0.71±0.2 <sup>+</sup>     | 1.4±0.2     | 2.5±0.1 <sup>+</sup>     | p=0.0002      | p=0.1826    | p=0.0005    |
| Glucose (mM)                    | 4.5±0.2   | 4.9±0.8                   | 5.0±0.1     | 5.12±0.4                 | p=0.4624      | p=0.5975    | p=0.7505    |
| NEFA (mm/L)                     | 1.03±0.02 | 0.58±0.04 <sup>+</sup>    | 1.08±0.03   | 0.55±0.03 <sup>+</sup>   | p=0.7512      | p<0.0001    | p=0.2188    |
| TKB (mM)                        | 0.72±0.09 | 2.3±0.1 <sup>+</sup>      | 0.31±0.01*  | 1.48±0.1 <sup>+</sup>    | p<0.0001      | p<0.0001    | p=0.0311    |
| Liver weight (g)                | 10.5±0.6  | 8.7±0.2 <sup>+</sup>      | 18.9±5*     | 12.1±0.5 <sup>+</sup>    | p=0.0381      | p=0.1153    | p=0.3430    |
| Liver TAG (mg/g)                | 6.1±0.3   | 4.7 ± 0.8                 | 9.5±0.7*    | 12.7±2 <sup>+</sup>      | p=0.0003      | p=0.4461    | p=0.0671    |
| Liver TBARS (nmoles/mg protein) | 0.13±0.02 | 0.45 ± 0.05 <sup>++</sup> | 0.34±0.07** | 1.52±0.04 <sup>+++</sup> | p<0.0001      | p<0.0001    | p<0.0001    |
| Visceral fat (g)                | 9.8±2     | 10.1 ± 0.3                | 35.7±3*     | 36 ± 1                   | p<0.0001      | p=0.8757    | p=0.9891    |

Results are the mean ± SEM of 4 rats per group. Data were analyzed by Two-way

ANOVA followed by Tukey's correction. Two-way ANOVA was performed to detect

main effects of age, time of fasting (16h vs. 36h), and their interaction. Results with values of  $p < 0.05$  were considered statistically significant. \* $p < 0.05$ , \*\* $p < 0.01$ , vs the young rats. + $p < 0.05$ , ++ $p < 0.01$ , +++ $p < 0.001$  vs the age-matched rats

**Supplemental Table S3.** Proteins quantified in nuclear enriched fraction from 3-month- and 24-month-old Wistar rats. F: 36h fast; F+R: 36h fast + 30 min refed. The Excel tables are available in the compressed zip file named Supplemental Material

**Supplemental Table S4.** Biological processes and metabolic pathways altered in rat liver nuclear enriched fractions upon aging or fasting-refeeding cycle. Representative categories affected ( $\text{FDRc} \leq 0.05\%$ ) are shown, indicating their corresponding identified proteins, their standardized quantitations ( $z_q$ ) shaded according to a color scale shown at the top and the number of peptides per protein detected. F: 36h fast; F+R: 36h fast + 30 min refed. The Excel tables are available in the compressed zip file named Supplemental Material

**Supplemental Figure S1.** An overview of the methods and procedures employed in this work. The figure is available in the compressed zip file named Supplemental Material
