# Supplementary material for: Aging Induces Hepatic Oxidative Stress and Nuclear Proteomic Remodeling in Liver from Wistar Rats
Source: Antioxidants (Basel). 2021 Sep 27;10(10):1535. doi: 10.3390/antiox10101535 (PMC8533122; doi:10.3390/antiox10101535)
Supplement: Supplementary file 1 [file antioxidants-10-01535-s001.zip]

Archive with 4 entries (4 files):
- 21.9.21Frvs Supplementary Material.pdf
- Figure S1.pdf
- Suppemental Material. Table S4.xlsx
- Supplemental Material. Table S3.xlsx
