# Supplementary material for: Aging Induces Hepatic Oxidative Stress and Nuclear Proteomic Remodeling in Liver from Wistar Rats
Source: Antioxidants (Basel). 2021 Sep 27;10(10):1535. doi: 10.3390/antiox10101535 (PMC8533122; doi:10.3390/antiox10101535)
Supplement: Supplementary file 1 [file antioxidants-10-01535-s001.zip › Suppemental Material. Table S4.xlsx]

## Sheet: Supp. Table 4
Supp. Table 4.	Biological processes and metabolic pathways altered (FDRc<=0.05%) in rat liver nuclear enriched fractions upon aging or fasting-refeeding				-3	0	3
zq: standardized protein quantitations			F: 36h fast; F+R: 36h fast + 30 min refed
					zq
		UniProt ID	Description	#Pep_per_prot	3mF vs. 24mF	3mF vs. 3mF+R	24mF vs 24mF+R	3mF+Rvs24mF+R
Mitochondrial Process	Tricarboxilic acid cycle (TCA)	P00507	Aspartate aminotransferase	15	2.30885	-0.916546	-0.340009	2.17958
		P56574	Isocitrate dehydrogenase	10	1.32836	0.850778	0.342953	0.961213
		Q8VHF5	Citrate synthase	8	1.23106	-0.071624	0.492602	1.48318
		P04636	Malate dehydrogenase	18	0.32852	-0.658053	0.274605	0.960468
		Q920L2	Succinate dehydrogenase	8	-0.425698	0.125302	-1.32826	-0.838364
		P08461	Dihydrolipoyllysine-residue acetyltransferase component of pyruvate dehydrogenase complex	6	-0.722186	-0.679951	3.19132	0.850748
		UniProt ID	Description	#Pep_per_prot	3mF vs. 24mF	3mF vs. 3mF+R	24mF vs 24mF+R	3mF+Rvs24mF+R
	Electron transport chain and ATP synthesis	P10719	ATP synthase (subunit alpha)	34	11.3922	-0.327751	0.230594	1.107
		P10719	ATP synthase (subunit beta)	38	11.3922	-0.327751	0.230594	1.107
		Q6UPE1	Electron transfer flavoprotein-ubiquinone oxidoreductase	17	1.64148	-0.745691	-1.45851	1.44948
		P35435	ATP synthase (subunit gamma)	15	1.15939	0.572687	-0.000523048	0.823812
		P13803	Electron transfer flavoprotein subunit alpha	11	0.884673	-0.391221	-0.678186	0.763532
		Q641Y2	NADH dehydrogenase iron-sulfur protein 2	7	0.661719	0.0206646	-0.0272579	0.334968
		Q66HF1	NADH-ubiquinone oxidoreductase 75 kDa subunit	19	0.59196	0.138754	-0.780462	0.260832
		Q06647	ATP synthase (subunit O)	9	0.148851	0.557412	0.167461	0.364835
		UniProt ID	Description	#Pep_per_prot	3mF vs. 24mF	3mF vs. 3mF+R	24mF vs 24mF+R	3mF+Rvs24mF+R
	Beta-oxidation and Ketone bodies synthesis	P29147	D-beta-hydroxybutyrate dehydrogenase	16	2.95682	-0.943233	1.60424	3.14572
		P17764	Acetyl-CoA acetyltransferase	12	2.3927	1.726	-0.351581	1.67294
		P32198	Carnitine O-palmitoyltransferase 1		2.27362	2.81045	-4.40721	-0.630928
		P22791	Hydroxymethylglutaryl-CoA synthase	20	1.65619	-1.15363	0.101246	1.98721
		P15651	Short-chain specific acyl-CoA dehydrogenase	14	1.33294	0.161532	-0.650137	0.956289
		Q64428	Trifunctional enzyme subunit alpha (hydroxyacyl-CoA dehydrogenase/3-ketoacyl-CoA thiolase/enoyl-CoA hydratase)	10	1.14028	-1.36545	-1.34774	1.19199
		P45953	Very long-chain specific acyl-CoA dehydrogenase	9	1.06033	-0.193764	0.273448	0.886316
		P13437	3-ketoacyl-CoA thiolase	17	0.953704	-0.654471	-1.7947	0.795563
		Q9WVK7	Hydroxyacyl-coenzyme A dehydrogenase	20	0.933753	-0.545104	0.00886251	1.29014
		P14604	Enoyl-CoA hydratase	29	0.779221	-0.569121	-0.489759	1.25193
		P08503	Medium-chain specific acyl-CoA dehydrogenase	9	0.543327	-0.673267	-1.46461	0.357452
		UniProt ID	Description	#Pep_per_prot	3mF vs. 24mF	3mF vs. 3mF+R	24mF vs 24mF+R	3mF+Rvs24mF+R
ER Process	ER overload response and ER-associated proteins	P20816	Cytochrome P450 (4A2)	19	3.21519	0.259313	-8.22972	0.121201
		Q8VHE9	All-trans-retinol 13,14-reductase	8	2.98758	3.00729	-6.43478	-1.0238
		P08683	Cytochrome P450 (2C11)	17	3.76973	-0.411512	-3.11445	2.86319
		P06761	78 kDa glucose-regulated protein (GRP78)	24	0.316663	-0.931383	-2.76432	-0.113914
		Q66HD0	Endoplasmin (94 kDa glucose-regulated protein GRP94)	16	1.0342	-0.865871	-2.50226	0.558274
		P11507	Sarcoplasmic/endoplasmic reticulum calcium ATPase 2	6	0.752693	1.28062	-1.19867	-0.43468
		Q6ZWX6	Eukaryotic translation initiation factor 2 subunit 1	6	0.117678	-0.170826	-1.03971	-0.161715
		O70351	3-hydroxyacyl-CoA dehydrogenase type-2	12	0.860529	-1.39743	-0.577458	1.1478
		P00388	NADPH--cytochrome P450 reductase	12	1.25071	0.140943	-0.329526	1.07431
		Q9ES38	Bile acyl-CoA synthetase	16	-2.29111	0.0643091	-0.313257	-2.2331
		P05182	Cytochrome P450 (2E1)	11	0.325762	1.77544	-0.00258124	-0.551327
		P24470	Cytochrome P450 (2C23)	14	0.985087	-0.0149075	-0.0017847	0.98275
		P24368	Peptidyl-prolyl cis-trans isomerase B	16	-1.64777	-2.60604	0.0800978	-0.322629
		P16232	Corticosteroid 11-beta-dehydrogenase isozyme 1	11	-2.01018	-2.11639	0.209218	-0.756855
		P04785	Protein disulfide-isomerase (PDI)	20	0.558029	-1.35129	0.995425	1.5015
		P08542	UDP-glucuronosyltransferase 2B17	10	-1.02844	-2.2893	1.09721	0.604523
		P18163	Long-chain-fatty-acid--CoA ligase 1	41	0.338913	-1.98468	1.6283	1.65839
		P07687	Epoxide hydrolase 1	20	-2.9185	0.752859	1.79572	-2.23708
		P05179	Cytochrome P450 (2C7)	14	-1.59914	-0.248985	3.75693	0.139471
		UniProt ID	Description	#Pep_per_prot	3mF vs. 24mF	3mF vs. 3mF+R	24mF vs 24mF+R	3mF+Rvs24mF+R
	Arachidonic and Linoleic acid metabolism	P05183	Cytochrome P450 (3A2)	7	5.61826	1.47172	-4.09311	3.501
		P13107	Cytochrome P450 (2B3)	6	4.09276	2.75246	0.0402014	2.34432
		P08683	Cytochrome P450 (2C11)	17	3.76973	-0.411512	-3.11445	2.86319
		P20816	Cytochrome P450 (4A2)	19	3.21519	0.259313	-8.22972	0.121201
		Q64581	Cytochrome P450 (3A18)	3	2.41734	1.20345	0.259557	1.91544
		P33274	Cytochrome P450 (4AF1)	4	1.6622	0.397574	-0.440273	1.24896
		P08516	Cytochrome P450 (4A10)	2	1.58759	1.91748	0.0207058	0.314164
		P20817	Cytochrome P450 (4A14)	4	1.56114	1.07129	-1.89847	0.0815514
		P04167	Cytochrome P450 (2B2)	2	1.53305	0	0	0
		P20814	Cytochrome P450 (2C13)	2	1.44196	0.981087	-1.73391	-0.139326
		P19225	Cytochrome P450 (2C70)	3	1.36552	0.211513	1.81021	1.95632
		P24470	Cytochrome P450 (2C23)	14	0.985087	-0.0149075	-0.0017847	0.98275
		P05182	Cytochrome P450 (2E1)	11	0.325762	1.77544	-0.00258124	-0.551327
		P05179	Cytochrome P450 (2C7)	14	-1.59914	-0.248985	3.75693	0.139471
		P04041	Glutathione peroxidase 1	5	-2.6417	0.261671	2.06313	-1.64284
		UniProt ID	Description	#Pep_per_prot	3mF vs. 24mF	3mF vs. 3mF+R	24mF vs 24mF+R	3mF+Rvs24mF+R
	Drugs/Xenobiotics metabolism	P13107	Cytochrome P450 (2B3)	6	4.09276	2.75246	0.0402014	2.34432
		P08683	Cytochrome P450 (2C11)	17	3.76973	-0.411512	-3.11445	2.86319
		P15149	Cytochrome P450 (2A2)	4	2.08096	0.925763	-1.82966	2.08489
		P04167	Cytochrome P450 (2B2)	2	1.53305	0	0	0
		P17988	Sulfotransferase (1A1)	3	1.42387	-0.747934	-2.07036	0.958931
		P52847	Sulfotransferase (1B1)	3	0.942656	1.31415	-0.923386	-0.216207
		P10634	Cytochrome P450 (2D26)	6	0.845997	1.43673	1.69871	0.684677
		P12938	Cytochrome P450 (2D3)	10	0.801831	1.20055	0.687499	0.367515
		P10633	Cytochrome P450 (2D1)	6	0.617777	-0.503054	-1.99011	0.162337
		P05182	Cytochrome P450 (2E1)	11	0.325762	1.77544	-0.00258124	-0.551327
		Q9Z0U5	Aldehyde oxidase	4	-0.132075	-1.73911	-0.908318	0.697723
		Q64550	UDP-glucuronosyltransferase 1-1	9	-0.499299	-1.31685	-0.525741	-0.145416
		P14942	Glutathione S-transferase (Mu 2, alpha-4,	2	-0.609719	-1.733	-0.0468535	0.582976
		P05178	Cytochrome P450 (2C6)	9	-1.49874	-0.271192	0.547325	-1.04133
		P11711	Cytochrome P450 (2A1)	10	-1.6858	1.34069	0.853063	-1.76237
		P07687	Epoxide hydrolase 1	20	-2.9185	0.752859	1.79572	-2.23708
		UniProt ID	Description	#Pep_per_prot	3mF vs. 24mF	3mF vs. 3mF+R	24mF vs 24mF+R	3mF+Rvs24mF+R
Stress	Response to oxidative stress process and acute phase response	P07895	Superoxide dismutase [Mn], mitocondrial	6	-0.289327	-1.16605	-3.44389	-1.03643
		P07895	Superoxide dismutase [Mn], mitocondrial	6	-0.289327	-1.16605	-3.44389	-1.03643
		Q66HD0	Endoplasmin	16	1.0342	-0.865871	-2.50226	0.558274
		P02770	Serum albumin	14	0.410241	-1.26284	-2.43046	-0.0274322
		P17988	Sulfotransferase 1A1	3	1.42387	-0.747934	-2.07036	0.958931
		P30839	Fatty aldehyde dehydrogenase	15	1.20878	-1.16311	-1.69115	1.08057
		Q6UPE1	Electron transfer flavoprotein-ubiquinone oxidoreductase, mitocondrial	17	1.64148	-0.745691	-1.45851	1.44948
		P48199	C-reactive protein	2	1.86187	0.959926	-1.37635	0.42332
		D4A3V2	NADH dehydrogenase [ubiquinone] 1 alpha subcomplex subunit 6	2	-0.164627	-1.44605	-1.21143	0.264037
		P14141	Carbonic anhydrase 3	9	5.92572	-0.500986	-1.18812	6.16745
		Q02253	Methylmalonate-semialdehyde dehydrogenase, mitochondrial	18	1.26285	-0.414425	-0.393997	1.25815
		P02650	Apolipoprotein E	3	-0.737995	-0.0600453	-0.320565	-0.682275
		Q63716	Peroxiredoxins (1)	2	-0.721902	-1.28103	-0.220363	0.0211383
		Q5XHZ0	Heat shock protein 75 kDa, mitochondrial	4	0.730639	0.885408	-0.0891944	0.238956
		Q9Z0J5	Thioredoxin reductase 2, mitochondrial	3	0.605302	-1.14229	-0.0656449	1.29998
		Q9Z0J5	Thioredoxin reductase 2, mitochondrial	3	0.605302	-1.14229	-0.0656449	1.29998
		P82995	Heat shock protein HSP 90-alpha	9	-0.0917724	-0.969933	0.00561276	0.396543
		Q5I0H9	Protein disulfide-isomerase (PDI) A5	22	0.163778	-2.09597	0.156894	1.17293
		P36970	Phospholipid hydroperoxide glutathione peroxidase, mitocondrial	2	0.292283	0.880751	0.209549	-0.180584
		P04762	Catalase	23	0.428175	0.0901065	0.29318	0.546696
		P35704	Peroxiredoxins (2)	4	-0.240516	-0.371981	0.32468	0.137768
		Q9R063	Peroxiredoxins (5)	8	2.51163	0.842887	0.387799	2.06257
		B0BNE6	NADH dehydrogenase (Ubiquinone) Fe-S protein 8 (Predicted), isoform CRA_a	3	0.594557	0.632972	0.450698	0.47446
		Q6AXM8	Serum paraoxonase/arylesterase 2	2	1.0221	0.291238	0.493052	0.857594
		P51647	Retinal dehydrogenase	5	-1.2014	1.61483	0.520335	-2.69596
		O35244	Peroxiredoxins (6)	9	0.385443	0.271097	0.627309	0.525411
		P26772	Heat shock protein 10 kDa, mitochondrial	6	0.53472	-1.2088	0.633982	1.39318
		P08010	Glutathione S-transferase Mu 2	18	0.335719	-0.764229	0.852278	0.986794
		B0BNF9	Hydroxyacid oxidase 1	5	0.526314	0.110355	1.20933	0.946875
		P07632	Superoxide dismutase [Cu-Zn]	5	-0.215268	-0.0711746	1.80953	0.503109
		P31044	Phosphatidylethanolamine-binding protein 1	2	-0.753998	-0.820073	2.00626	0.590475
		P31044	Phosphatidylethanolamine-binding protein 1	2	-0.753998	-0.820073	2.00626	0.590475
		P04041	Glutathione peroxidase 1	5	-2.6417	0.261671	2.06313	-1.64284
		P04264	Keratin, type II cytoskeletal 1	14	-1.32929	-2.09048	3.79648	0.672165
		UniProt ID	Description	#Pep_per_prot	3mF vs. 24mF	3mF vs. 3mF+R	24mF vs 24mF+R	3mF+Rvs24mF+R
	nuclear export/import, Cell cycle	P35213	14-3-3 protein (beta/alpha)	3	-0.571379	-1.15471	-2.30727	-0.837419
		P62259	14-3-3 protein (epsilon)	5	-0.0134284	-0.565342	-1.94767	-0.579502
		A7VJC2	Heterogeneous nuclear ribonucleoprotein A1	10	-2.53943	-2.37168	-1.08901	-1.63589
		O35821	Myb-binding protein 1A	4	-2.05056	-0.867783	-0.395809	-1.61219
		UniProt ID	Description	#Pep_per_prot	3mF vs. 24mF	3mF vs. 3mF+R	24mF vs 24mF+R	3mF+Rvs24mF+R
	DNA synthesis, DNA damage and repair	P46462	Transitional endoplasmic reticulum ATPase	10	0.287238	-0.369434	-1.45597	-0.196018
		Q641Y8	ATP-dependent RNA helicase DDX1	10	-0.847006	-1.28704	-1.03814	-0.545343
		Q6ZWY3	40S ribosomal protein S27-like	2	-0.0847442	1.97145	-0.750006	-1.71308
		P13084	Nucleophosmin	7	-1.33699	-0.970102	-0.729899	-1.54533
		P28042	Single-stranded DNA-binding protein, mitochondrial	5	-0.18277	-0.784446	-0.705218	-0.14121
		P67778	Prohibitin	2	-0.755944	-0.401672	0.049682	-0.422645
		Q5FVM4	Non-POU domain-containing octamer-binding protein	5	-1.29384	0.969303	1.50813	-1.20112
		P07632	Superoxide dismutase[Cu-Zn]	5	-0.215268	-0.0711746	1.80953	0.503109
		UniProt ID	Description	#Pep_per_prot	3mF vs. 24mF	3mF vs. 3mF+R	24mF vs 24mF+R	3mF+Rvs24mF+R
	Nucleolus, Ribonucleoprotein complex	D4AAZ6	60S ribosomal proteins (L37a)	2	-0.928443	1.872	-2.10783	-3.214
		P13383	Nucleolin	15	-1.78782	-3.13805	-1.74747	-0.822722
		A7VJC2	Heterogeneous nuclear ribonucleoproteins (A2/B1)	10	-2.53943	-2.37168	-1.08901	-1.63589
		P04256	Heterogeneous nuclear ribonucleoproteins (A1)	3	-2.1541	-0.0891188	-0.965117	-2.44374
		P13084	Nucleophosmin	7	-1.33699	-0.970102	-0.729899	-1.54533
		P12001	60S ribosomal proteins (L18)	5	-1.75182	-1.56855	-0.262879	-0.904442
		P05765	40S ribosomal protein (S21)	5	-0.578113	0.310637	-0.17565	-0.764757
		P09895	60S ribosomal proteins (L5)	9	-0.895259	-0.0325956	-0.0938342	-0.790007
		P17702	60S ribosomal proteins ( L28)	3	-0.856098	0.495762	-0.0426893	-1.13867
		P31977	Ezrin	8	-0.581696	-1.80383	0.014241	0.377225
		P12749	60S ribosomal proteins (L26)	6	-1.12494	0.67449	0.0221051	-1.38087
		P13471	40S ribosomal protein (S14)	5	-0.741232	-0.147261	0.0542031	-0.608626
		P40615	H/ACA ribonucleoprotein complex subunit 4	8	-1.11267	-0.00410401	0.126637	-0.911167
		P21531	60S ribosomal proteins (L3)	7	-1.05809	-0.618626	0.162995	-0.502034
		P21533	60S ribosomal proteins (L6)	9	-0.517529	0.665526	0.223308	-0.728994
		P05426	60S ribosomal proteins (L7)	10	-0.970194	0.216662	0.269066	-0.951704
		P62830	60S ribosomal proteins (L23)	3	-0.392266	0.883799	0.493951	-0.693128
		P18445	60S ribosomal proteins ( L27a)	4	-0.573657	1.93759	0.524612	-1.48206
		P05197	Elongation factor 2	21	0.108232	0.000131711	0.605978	0.323981
		P20280	60S ribosomal proteins (L21)	1	0.191148	1.61125	0.977503	-0.508123
		P22509	rRNA 2'-O-methyltransferase fibrillarin	8	-0.179985	-0.252964	0.979593	0.311103
		P02401	60S acidic ribosomal protein (P2)	3	-1.27228	-1.60819	1.02499	0.138266
		Q4V8K6	Heterogeneous nuclear ribonucleoproteins (C)	5	-1.52202	-0.537705	1.03941	-0.79814
		P62754	40S ribosomal protein (S6)	5	-1.743	0.140436	1.22419	-1.16089
		P19945	60S acidic ribosomal protein (PO)	10	-1.55716	-1.81529	1.30893	-0.10648
		P04644	40S ribosomal protein (S17)	2	-1.38241	-1.13477	1.395	0.130835
		P17077	60S ribosomal proteins (L9)	5	-1.17776	-0.0340493	1.61059	-0.407817
		P62301|	40S ribosomal protein (S13)	6
		UniProt ID	Description	#Pep_per_prot	3mF vs. 24mF	3mF vs. 3mF+R	24mF vs 24mF+R	3mF+Rvs24mF+R
	RNA processing and splicing, spliceosomal complex	A7VJC2	Heterogeneous nuclear ribonucleoproteins (A2/B1)	10	-2.53943	-2.37168	-1.08901	-1.63589
		P84586	Heterogeneous nuclear ribonucleoproteins (G (retrogene-like))	2	-2.35489	-2.36337	-0.204368	-0.850647
		P04256	Heterogeneous nuclear ribonucleoproteins (A1)	3	-2.1541	-0.0891188	-0.965117	-2.44374
		P61979	Heterogeneous nuclear ribonucleoproteins (K)	3	-1.74567	-0.833007	-0.221575	-1.36106
		Q4V898	Heterogeneous nuclear ribonucleoproteins (G)	2	-1.72535	0	0	0
		Q4V8K6	Heterogeneous nuclear ribonucleoproteins (C (C1/C2))	5	-1.52202	-0.537705	1.03941	-0.79814
		Q9EPH8	Polyadenylate-binding protein 1	5	-1.51357	-0.8377	-2.50178	-1.97998
		P38656	Lupus La protein homolog	3	-1.3421	-0.539599	-0.946477	-1.39605
		Q9Z1N5	Spliceosome RNA helicase Ddx39b	2	-1.31349	-1.44927	0.58051	0.0154058
		Q5FVM4	Non-POU domain-containing octamer-binding protein	5	-1.29384	0.969303	1.50813	-1.20112
		Q8VHV7	Heterogeneous nuclear ribonucleoproteins (H)	4	-1.19613	-0.712824	-0.777084	-0.975902
		P40615	H/ACA ribonucleoprotein complex subunit 4	8	-1.11267	-0.00410401	0.126637	-0.911167
		Q00438	Polypyrimidine tract-binding protein 1	8	-0.951429	-0.676953	-0.698364	-0.741139
		Q62826	Heterogeneous nuclear ribonucleoproteins (M)	8	-0.927624	-0.78158	-1.24429	-0.959016
		B5DEQ4	RCG27500, isoform CRA_c	3	-0.895583	0.0549803	-0.485133	-1.1279
		Q5U216	ATP-dependent RNA helicase DDX39A	4	-0.884953	0.0558237	-0.52176	-1.12977
		D3ZQM0	Splicing factor 3A, subunit 1	2	-0.738748	1.13076	1.3021	-0.781193
		P62320	Small nuclear ribonucleoprotein Sm (D3)	3	-0.580256	1.50292	-0.69872	-1.68492
		Q4KM38	FUS interacting protein (Serine-arginine rich) 1	2	-0.448229	1.05374	1.24034	-0.504392
		Q9D0T1	NHP2-like protein 1	4	-0.428086	-0.250181	0.280759	-0.12284
		Q7TP47	Heterogeneous nuclear ribonucleoproteins (Q)	2	-0.421433	0.137836	-1.03424	-0.995386
		Q9D554	Splicing factor 3A subunit 3	2	-0.329176	1.74866	-0.44131	-1.71868
		Q66X93	Staphylococcal nuclease domain-containing protein 1	39	-0.284068	-3.04563	-1.71151	0.534219
		P62317	Small nuclear ribonucleoprotein Sm (D2)	3	-0.249643	0.62031	-0.876778	-1.06933
		P84104	Serine/arginine-rich splicing factor (3)	3	-0.205248	-0.130283	3.55465	1.70715
		P22509	rRNA 2'-O-methyltransferase fibrillarin	8	-0.179985	-0.252964	0.979593	0.311103
		Q27W01	RNA-binding protein 8A	2	0.0659659	2.00244	0.063476	-1.19014
		Q99PV0	Pre-mRNA-processing-splicing factor 8	6	0.15954	2.24981	0.269394	-1.0604
		P62996	Transformer-2 protein homolog beta	2	0.189374	1.01456	1.28904	0.177985
		Q6PDM2	Serine/arginine-rich splicing factor (1)	8	0.36874	1.34483	0.35988	-0.118611
		Q27W0	Eukaryotic initiation factor 4A-III	5
		UniProt ID	Description	#Pep_per_prot	3mF vs. 24mF	3mF vs. 3mF+R	24mF vs 24mF+R	3mF+Rvs24mF+R
	Nucleosome, nucleosome assembly, chromatin remodeling	P43278	Histones (H1.0)	5	-2.6114	-0.077239	0.127172	-2.40821
		P15865	Histones (H1.2)	1	-2.18616	0.634285	0.591866	-1.66042
		P0C169	Histones ( H2B type 1-C,)	4	-2.01349	-2.79384	2.09928	0.666449
		P13383	Nucleolin	15	-1.78782	-3.13805	-1.74747	-0.822722
		Q02874	Core histone macro-H2A.1	6	-1.69715	-0.0625094	0.995835	-1.20281
		P13084	Nucleophosmin	7	-1.33699	-0.970102	-0.729899	-1.54533
		P62806	Histones (H4)	12	-1.24737	-0.288065	2.32966	-0.0480739
		Q00729	Histones ( H2B type 1-A)	6	-1.09947	0.643505	-0.246867	-1.49813
		Q3THW5	Histones (H2A.V)	3	-0.989486	-1.43139	2.16673	0.964336
		P48679	Prelamin-A/C	27	-0.294388	-3.65063	-0.829871	1.0694
