# Supplementary material for: Aging Induces Hepatic Oxidative Stress and Nuclear Proteomic Remodeling in Liver from Wistar Rats
Source: Antioxidants (Basel). 2021 Sep 27;10(10):1535. doi: 10.3390/antiox10101535 (PMC8533122; doi:10.3390/antiox10101535)
Supplement: Supplementary file 1 [file antioxidants-10-01535-s001.zip › Supplemental Material. Table S3.xlsx]

## Sheet: Protein quantitation
Supplementary Table 3. Proteins quantified in liver samples.			F: 36h fast; F+R: 36h fast + 30 min refed
	3m F vs 3m F+R			3m F vs 24m F			3m F+R vs 24m F+R			24m F vs 24m F+R
Protein	Zq	FDRq	pep_per_protein	Zq	FDRq	pep_per_protein	Zq	FDRq	pep_per_protein	Zq	FDRq	pep_per_protein
>sp|A0JPJ7|OLA1_RAT Obg-like ATPase 1 OS	-0.63999	1.0197	1	0.394292	1.0184	1	1.30006	1.01536	1	0.651678	1.01918	1
>sp|A0JPQ8|ALKMO_RAT Alkylglycerol monooxygenase OS	2.54469	0.311909	1	2.77926	0.171671	1	-0.0977428	0.990353	1	-1.46384	0.775392	1
>sp|A0JPQ9|CHID1_RAT Chitinase domain-containing protein 1 OS	-1.0236	0.984755	2	-0.258047	1.01522	2	0.2623	1.00905	2	-0.274048	1.00023	2
>sp|A1L1L2|TM214_RAT Transmembrane protein 214 OS	1.16176	0.954777	1	0.507936	1.01209	1	-0.752064	1.00269	1	-0.595127	1.0194	1
>sp|A2AS89|SPEB_MOUSE Agmatinase, mitochondrial OS	-0.397783	1.0312	1	-0.130454	1.00246	1	1.14373	1.02994	1	1.62901	0.673799	1
>sp|A2VCW9|AASS_RAT Alpha-aminoadipic semialdehyde synthase, mitochondrial OS	-0.30487	1.00948	1	-0.56804	1.00838	1	0.00673747	1.00078	1	0.513609	1.02666	1
>sp|A7VJC2|ROA2_RAT Heterogeneous nuclear ribonucleoproteins A2/B1 OS	-2.37168	0.430701	10	-2.53943	0.226132	10	-1.63589	0.920147	10	-1.08901	0.875879	10
>sp|B0BNA9|CB029_RAT UPF0760 protein C2orf29 homolog OS	1.11828	0.943166	1	0.198661	1.01958	1	-0.280552	1.00615	1	0.711734	1.02387	1
>sp|B0BNC9|QORL2_RAT Quinone oxidoreductase-like protein 2 OS	0.847341	1.00201	2	0.909504	0.981149	2	-0.14599	1.00228	2	-1.04926	0.930893	2
>sp|B0BNE5|ESTD_RAT S-formylglutathione hydrolase OS	-0.0142897	1.00562	2	0.103308	0.997131	2	-0.116673	0.99526	2	-0.755845	1.01724	2
>sp|B0BNN3|CAH1_RAT Carbonic anhydrase 1 OS	1.14508	0.945804	3	-0.580937	1.01007	3	-0.418127	1.02227	3	1.72012	0.627629	3
>sp|B0K020|CISD1_RAT CDGSH iron-sulfur domain-containing protein 1 OS	1.27119	0.933111	3	0.736707	0.999185	3	0.0707017	0.991823	3	0.278634	1.00203	3
>sp|B2GV24|UFL1_RAT E3 UFM1-protein ligase 1 OS	0.0444886	1.00397	2	-0.67963	0.999461	2	-0.274864	1.00699	2	0.753857	1.01994	2
>sp|B2RYW9|FAHD2_RAT Fumarylacetoacetate hydrolase domain-containing protein 2 OS	-0.156897	1.02173	1	0.556462	1.0053	1	1.33243	1.01055	1	1.06438	0.923449	1
>sp|B3DMA2|ACD11_RAT Acyl-CoA dehydrogenase family member 11 OS	0.363569	1.01679	26	-0.861978	0.992551	26	-1.21644	1.03094	26	-0.73693	1.02313	26
>sp|B5DEH2|ERLN2_RAT Erlin-2 OS	0.00230319	1.0024	1	0.182348	1.01736	1	-0.401391	1.0135	1	-1.02885	0.933652	1
>sp|B5DFC8|EIF3C_RAT Eukaryotic translation initiation factor 3 subunit C OS	-0.533469	1.02505	1	0.250007	1.0177	1	0.145245	1.00295	1	-0.951553	0.974182	1
>sp|D4AAZ6|RL37A_RAT 60S ribosomal protein L37a OS	1.872	0.684029	2	-0.928443	0.970076	2	-3.214	0.0818626	2	-2.10783	0.418492	2
>sp|O08547|SC22B_MOUSE Vesicle-trafficking protein SEC22b OS	1.10684	0.944412	3	-0.264324	1.01525	3	-1.04659	1.00237	3	-0.426656	1.01067	3
>sp|O08557|DDAH1_RAT N(G),N(G)-dimethylarginine dimethylaminohydrolase 1 OS	-0.991699	0.977028	2	-0.465589	1.01451	2	0.085489	0.994242	2	-0.0856083	1.00948	2
>sp|O08629|TIF1B_RAT Transcription intermediary factor 1-beta OS	0.855672	1.00257	1	1.01998	0.951709	1	-0.511637	1.00823	1	-1.51156	0.747077	1
>sp|O08699|PGDH_RAT 15-hydroxyprostaglandin dehydrogenase [NAD+] OS	0.365274	1.0176	1	0.48173	1.01066	1	-0.419806	1.02327	1	-1.08612	0.912025	1
>sp|O08738|CASP6_MOUSE Caspase-6 OS	-0.367349	1.0154	1	-0.190678	1.02122	1	-0.420826	1.02214	1	-0.939469	0.972972	1
>sp|O09171|BHMT1_RAT Betaine--homocysteine S-methyltransferase 1 OS	-1.40891	0.890701	18	1.70806	0.735352	18	3.79995	0.0194478	18	4.32971	0.00127616	18
>sp|O35077|GPDA_RAT Glycerol-3-phosphate dehydrogenase [NAD+], cytoplasmic OS	-0.231449	1.0137	7	0.163585	1.01113	7	1.41711	0.982194	7	2.87868	0.0982637	7
>sp|O35078|OXDA_RAT D-amino-acid oxidase OS	-1.36741	0.889206	3	-6.30585	4.78648e-07	3	-4.8104	0.000612304	3	1.14839	0.875935	3
>sp|O35132|CP27B_RAT 25-hydroxyvitamin D-1 alpha hydroxylase, mitochondrial OS	0.98336	0.978656	1	0.700398	1.00092	1	0.63873	1.02088	1	1.1584	0.878607	1
>sp|O35142|COPB2_RAT Coatomer subunit beta' OS	1.28847	0.939087	2	0.623898	1.00406	2	-0.282543	1.00899	2	-0.165968	1.00351	2
>sp|O35244|PRDX6_RAT Peroxiredoxin-6 OS	0.271097	1.0129	9	0.385443	1.01639	9	0.525411	1.00771	9	0.627309	1.01229	9
>sp|O35413|SRBS2_RAT Sorbin and SH3 domain-containing protein 2 OS	1.30871	0.924643	5	0.334626	1.01174	5	0.309231	1.00746	5	1.62225	0.677738	5
>sp|O35490|BHMT1_MOUSE Betaine--homocysteine S-methyltransferase 1 OS	-0.557401	1.01572	1	0.267692	1.01582	1	0.993603	0.983012	1	0.436159	1.02403	1
>sp|O35509|RB11B_RAT Ras-related protein Rab-11B OS	0.828687	1.00096	1	0.917836	0.978818	1	0.431907	1.02229	1	0.242335	1.00155	1
>sp|O35547|ACSL4_RAT Long-chain-fatty-acid--CoA ligase 4 OS	-0.519483	1.03106	1	0.173689	1.0146	1	-0.756161	0.999961	1	-1.68575	0.637405	1
>sp|O35777|MAGT1_RAT Magnesium transporter protein 1 OS	0.610999	1.02069	1	0.416811	1.01189	1	-0.147236	1.00326	1	-0.154764	1.003	1
>sp|O35796|C1QBP_RAT Complement component 1 Q subcomponent-binding protein, mitochondrial OS	-0.034014	1.0057	2	-1.40856	0.848158	2	-1.43232	0.965769	2	-0.61503	1.01577	2
>sp|O35814|STIP1_RAT Stress-induced-phosphoprotein 1 OS	0.450484	1.0385	1	0.099482	0.997186	1	0.0374347	0.997752	1	0.428119	1.01188	1
>sp|O35821|MBB1A_RAT Myb-binding protein 1A OS	-0.867783	1.00574	4	-2.05056	0.480839	4	-1.61219	0.924752	4	-0.395809	1.00555	4
>sp|O35913|SO1A4_RAT Solute carrier organic anion transporter family member 1A4 OS	-0.106659	1.01306	1	-0.756941	1.01348	1	-0.404767	1.01629	1	0.443267	1.02781	1
>sp|O35952|GLO2_RAT Hydroxyacylglutathione hydrolase, mitochondrial OS	0.173731	1.02507	3	1.55619	0.796162	3	1.13253	1.02336	3	-0.64236	1.01138	3
>sp|O54753|H17B6_RAT 17-beta-hydroxysteroid dehydrogenase type 6 OS	0.265265	1.01473	4	-0.524097	1.01453	4	-1.55053	0.969295	4	-1.97989	0.490442	4
>sp|O55012|PICA_RAT Phosphatidylinositol-binding clathrin assembly protein OS	-0.117877	1.01613	3	-0.187261	1.0193	3	-0.249106	1.00704	3	-0.426552	1.01078	3
>sp|O55096|DPP3_RAT Dipeptidyl peptidase 3 OS	-0.826536	0.999495	1	0.390026	1.01588	1	1.5013	0.994082	1	0.705685	1.01846	1
>sp|O55128|SAP18_MOUSE Histone deacetylase complex subunit SAP18 OS	1.23436	0.93742	3	-0.0432759	0.99528	3	-0.925315	0.97947	3	-0.364457	1.01396	3
>sp|O55171|ACOT2_RAT Acyl-coenzyme A thioesterase 2, mitochondrial OS	1.97787	0.624394	2	1.60049	0.778071	2	0.842834	0.988274	2	1.0878	0.913283	2
>sp|O55186|CD59A_MOUSE CD59A glycoprotein OS	-0.143545	1.02177	1	1.81587	0.658421	1	0.85907	1.00099	1	-1.98977	0.488423	1
>sp|O55222|ILK_MOUSE Integrin-linked protein kinase OS	0.422508	1.03881	1	-0.407998	1.01519	1	-0.958857	0.973381	1	-0.380161	1.00617	1
>sp|O70194|EIF3D_MOUSE Eukaryotic translation initiation factor 3 subunit D OS	-0.0288481	1.00493	1	-0.197755	1.01896	1	0.132107	0.996648	1	0.507457	1.02541	1
>sp|O70199|UGDH_RAT UDP-glucose 6-dehydrogenase OS	1.25012	0.939293	7	0.718367	0.990121	7	0.402058	1.01461	7	0.980495	0.959838	7
>sp|O70318|E41L2_MOUSE Band 4.1-like protein 2 OS	0.142418	1.02066	1	0.652208	1.01038	1	0.453266	1.01877	1	-0.199022	1.00648	1
>sp|O70351|HCD2_RAT 3-hydroxyacyl-CoA dehydrogenase type-2 OS	-1.39743	0.894729	12	0.860529	0.990046	12	1.1478	1.03869	12	-0.577458	1.01817	12
>sp|O70490|ACSM2_RAT Acyl-coenzyme A synthetase ACSM2, mitochondrial OS	0.965008	0.979345	2	0.672219	0.996919	2	-0.147502	1.00303	2	-0.433464	1.01642	2
>sp|O70595|ABCB6_RAT ATP-binding cassette sub-family B member 6, mitochondrial OS	-2.10312	0.574931	1	-2.78224	0.176776	1	-0.299315	1.00762	1	1.43863	0.787139	1
>sp|O70608|SYCP2_RAT Synaptonemal complex protein 2 OS	1.38588	0.896101	1	-0.51469	1.01027	1	-1.05077	1.00635	1	1.02471	0.932583	1
>sp|O88267|ACOT1_RAT Acyl-coenzyme A thioesterase 1 OS	0.947472	0.982665	2	1.36199	0.85829	2	0.726079	1.00879	2	-0.215864	1.00406	2
>sp|O88453|SAFB1_RAT Scaffold attachment factor B1 OS	0.390374	1.02731	1	-0.123608	1.00181	1	-0.885676	0.998428	1	-0.779383	1.0124	1
>sp|O88618|FTCD_RAT Formimidoyltransferase-cyclodeaminase OS	-0.788979	1.01343	14	-1.2655	0.871835	14	-0.661963	1.00978	14	1.14859	1.01395	14
>sp|O88761|PSMD1_RAT 26S proteasome non-ATPase regulatory subunit 1 OS	1.21578	0.950285	1	0.141019	1.00728	1	0.335454	1.00826	1	1.48107	0.765537	1
>sp|O88767|PARK7_RAT Protein DJ-1 OS	-2.6373	0.265815	1	-0.753749	1.00691	1	1.65607	0.897586	1	0.434532	1.02004	1
>sp|O88813|ACSL5_RAT Long-chain-fatty-acid--CoA ligase 5 OS	0.135052	1.02026	9	-2.94943	0.13991	9	-1.56997	0.941797	9	3.12538	0.0565454	9
>sp|O88867|KMO_RAT Kynurenine 3-monooxygenase OS	0.909587	0.990871	5	-0.800438	1.01169	5	-2.86459	0.178669	5	-4.00598	0.00385773	5
>sp|O88941|MOGS_RAT Mannosyl-oligosaccharide glucosidase OS	-0.828962	1.00057	9	-0.369112	1.01721	9	-0.34521	1.01097	9	-0.928993	0.979654	9
>sp|O88989|MDHC_RAT Malate dehydrogenase, cytoplasmic OS	0.258676	1.01261	7	-0.261609	1.01637	7	0.777463	0.992144	7	2.78333	0.126634	7
>sp|O88994|MOSC2_RAT MOSC domain-containing protein 2, mitochondrial OS	1.69831	0.762622	7	-2.14467	0.420511	7	-2.89044	0.17872	7	-0.674159	1.01797	7
>sp|O89046|COR1B_RAT Coronin-1B OS	0.0526929	1.00539	4	-1.27713	0.865295	4	-1.56555	0.940782	4	-0.828788	0.987062	4
>sp|O89094|CASPE_MOUSE Caspase-14 OS	-0.532898	1.02253	1	-1.36861	0.860761	1	0.615769	1.01965	1	2.67686	0.152768	1
>sp|O95678|K2C75_HUMAN Keratin, type II cytoskeletal 75 OS	-1.6527	0.801676	1				0.332927	1.00452	1	2.41345	0.224206	1
>sp|P00173|CYB5_RAT Cytochrome b5 OS	-0.618637	1.01931	6	-0.914333	0.979032	6	-0.450957	1.01941	6	0.215424	1.00298	6
>sp|P00176|CP2B1_RAT Cytochrome P450 2B1 OS	-1.53965	0.841606	3	1.94274	0.553634	1	1.68145	0.886411	3	-2.34848	0.29155	3
>sp|P00388|NCPR_RAT NADPH--cytochrome P450 reductase OS	0.140943	1.022	12	1.25071	0.865944	12	1.07431	1.01243	12	-0.329526	1.01313	12
>sp|P00406|COX2_RAT Cytochrome c oxidase subunit 2 OS	0.0682365	1.00515	3	0.737636	0.997962	3	1.0112	0.988652	3	0.350248	1.01312	3
>sp|P00481|OTC_RAT Ornithine carbamoyltransferase, mitochondrial OS	-0.949196	0.983557	17	1.04591	0.954843	17	1.49599	0.97746	17	0.0553513	1.0125	17
>sp|P00502|GSTA1_RAT Glutathione S-transferase alpha-1 OS	-0.585305	1.0227	10	1.24596	0.956665	10	1.97761	0.6667	10	1.02535	0.935178	10
>sp|P00507|AATM_RAT Aspartate aminotransferase, mitochondrial OS	-0.916546	0.9874	15	2.30885	0.50738	15	2.17958	0.560271	15	-0.340009	1.01263	15
>sp|P00761|TRYP_PIG Trypsin OS	0.953797	0.987137	2	-0.356813	1.013	2	-1.71273	0.860203	2	-2.40094	0.215707	2
>sp|P00786|CATH_RAT Pro-cathepsin H OS	2.14988	0.555407	1	1.31976	0.855192	1	0.32028	1.00452	1	0.677865	1.01573	1
>sp|P00884|ALDOB_RAT Fructose-bisphosphate aldolase B OS	-1.7239	0.761604	15	0.0075875	0.99813	15	1.25797	1.02998	15	1.30149	0.926928	15
>sp|P01026|CO3_RAT Complement C3 OS	-1.39437	0.899814	20	-0.432465	1.00929	20	-0.498315	1.00731	20	-2.10515	0.421262	20
>sp|P01048|KNT1_RAT T-kininogen 1 OS	0.122505	1.01685	1	-1.30585	0.862475	1	-1.4774	0.969815	1	-0.151932	1.00132	1
>sp|P01736|TVB3_MOUSE T-cell receptor beta chain V region PHDS203 (Fragment) OS	2.01805	0.62147	1	4.82376	0.000265106	1	4.06135	0.00610234	1	1.16568	0.875756	1
>sp|P01836|KACA_RAT Ig kappa chain C region, A allele OS	0.442592	1.03562	3	-1.14426	0.918736	3	-4.76699	0.000760136	3	-7.36658	7.10383e-11	3
>sp|P01942|HBA_MOUSE Hemoglobin subunit alpha OS	-0.288886	1.01574	1	-0.573192	1.01029	1	0.604598	1.00614	1	1.6013	0.652713	1
>sp|P01946|HBA_RAT Hemoglobin subunit alpha-1/2 OS	-1.9281	0.656806	10	-4.18574	0.00391496	8	-0.904474	0.977277	10	6.8183	1.5293e-09	10
>sp|P02089|HBB2_MOUSE Hemoglobin subunit beta-2 OS	0.901446	0.990952	1	-3.11117	0.0853883	5	-0.770516	0.987778	1	3.91277	0.00473318	1
>sp|P02091|HBB1_RAT Hemoglobin subunit beta-1 OS	-0.0749584	1.03256	15	-3.11117	0.0853883	9	-1.25806	0.989456	15	7.07275	6.89408e-09	15
>sp|P02262|H2A1_RAT Histone H2A type 1 OS	-2.49649	0.3401	1	0.492138	1.01442	1	4.65118	0.000766632	1	8.12354	1.803e-13	1
>sp|P02401|RLA2_RAT 60S acidic ribosomal protein P2 OS	-1.60819	0.803113	3	-1.27228	0.868197	3	0.138266	0.998062	3	1.02499	0.935695	3
>sp|P02463|CO4A1_MOUSE Collagen alpha-1(IV) chain OS	0.549469	1.01985	1	-0.116443	0.999468	1	-0.304813	1.00699	1	0.405463	1.00421	1
>sp|P02533|K1C14_HUMAN Keratin, type I cytoskeletal 14 OS	-0.160691	1.02257	1	0.184127	1.02005	1	0.880953	0.980976	1	0.887245	0.953157	1
>sp|P02535|K1C10_MOUSE Keratin, type I cytoskeletal 10 OS				-2.0169	0.480767	9
>sp|P02650|APOE_RAT Apolipoprotein E OS	-0.0600453	1.00562	3	-0.737995	1.00139	3	-0.682275	1.01255	3	-0.320565	1.01556	3
>sp|P02680|FIBG_RAT Fibrinogen gamma chain OS	0.0951623	1.01433	3	0.0218335	0.996908	3	-1.60148	0.935119	3	-3.4435	0.0245407	3
>sp|P02692|FABPL_RAT Fatty acid-binding protein, liver OS	0.200142	1.02175	12	0.181015	1.01355	12	1.87041	0.734417	12	4.65557	0.00164865	12
>sp|P02696|RET1_RAT Retinol-binding protein 1 OS	0.881543	1.0004	2	0.0324529	0.996182	2	-0.432772	1.02133	2	0.355997	1.01145	2
>sp|P02706|ASGR1_RAT Asialoglycoprotein receptor 1 OS	1.10645	0.945001	3	1.10819	0.935549	3	0.223489	1.00258	3	-0.334282	1.01506	3
>sp|P02761|MUP_RAT Major urinary protein OS	0.882243	0.9994	5	5.72711	0.00109765	5	3.8667	0.586674	5	-2.59693	0.166039	5
>sp|P02770|ALBU_RAT Serum albumin OS	-1.26284	0.922679	30	0.410241	1.01545	16	-0.0274322	1.00285	30	-2.43046	0.217669	30
>sp|P02793|FRIL1_RAT Ferritin light chain 1 OS	1.18751	0.957473	7	-2.97215	0.129964	7	-2.83019	0.184493	7	1.51883	0.744406	7
>sp|P04041|GPX1_RAT Glutathione peroxidase 1 OS	0.261671	1.01201	5	-2.6417	0.19965	5	-1.64284	0.922466	5	2.06313	0.437926	5
>sp|P04166|CYB5B_RAT Cytochrome b5 type B OS	0.227768	1.01496	3	-0.647802	1.00885	3	-0.607465	1.01121	3	0.53398	1.0306	3
>sp|P04167|CP2B2_RAT Cytochrome P450 2B2 OS				1.53305	0.801499	2
>sp|P04176|PH4H_RAT Phenylalanine-4-hydroxylase OS	-0.102403	1.01205	10	1.62349	0.765309	10	1.58854	0.944972	10	-0.234874	1.00489	10
>sp|P04182|OAT_RAT Ornithine aminotransferase, mitochondrial OS	-0.449345	1.03981	5	2.46199	0.256377	5	2.39127	0.395661	5	-0.57299	1.02022	5
>sp|P04256|ROA1_RAT Heterogeneous nuclear ribonucleoprotein A1 OS	-0.0891188	1.01089	3	-2.1541	0.420633	3	-2.44374	0.358107	3	-0.965117	0.964841	3
>sp|P04259|K2C6B_HUMAN Keratin, type II cytoskeletal 6B OS	-0.408633	1.03612	2	-1.34114	0.853384	2	-0.340448	1.00504	2	1.67182	0.615564	2
>sp|P04264|K2C1_HUMAN Keratin, type II cytoskeletal 1 OS	-2.09048	0.581677	17	-1.32929	0.857165	14	0.672165	1.00416	17	3.79648	0.129411	17
>sp|P04550|PTMS_RAT Parathymosin OS	-0.70371	1.02127	1	-0.730756	0.9967	1	0.371227	1.00893	1	0.90697	0.973391	1
>sp|P04636|MDHM_RAT Malate dehydrogenase, mitochondrial OS	-0.658053	1.02224	18	0.32852	1.01225	18	0.960468	0.976237	18	0.274605	1.00205	18
>sp|P04639|APOA1_RAT Apolipoprotein A-I OS	-0.371305	1.0147	1	0.785729	1.01761	1	0.00736854	1.00213	1	-1.86765	0.557674	1
>sp|P04642|LDHA_RAT L-lactate dehydrogenase A chain OS	-1.64445	0.799694	13	0.618645	1.00378	13	2.29058	0.854575	13	2.59746	0.928452	13
>sp|P04644|RS17_RAT 40S ribosomal protein S17 OS	-1.13477	0.944777	2	-1.38241	0.846911	2	0.130835	0.995723	2	1.395	0.809589	2
>sp|P04692-2|TPM1_RAT Isoform 2 of Tropomyosin alpha-1 chain OS	-1.60174	0.813685	9	-1.97777	0.533901	9	-0.446238	1.02896	9	1.1672	1.00657	9
>sp|P04692-4|TPM1_RAT Isoform 4 of Tropomyosin alpha-1 chain OS	-2.12605	0.589445	3				-0.547035	1.01296	3	1.33982	0.82482	3
>sp|P04692-5|TPM1_RAT Isoform 5 of Tropomyosin alpha-1 chain OS				-2.5756	0.222817	3
>sp|P04692-8|TPM1_RAT Isoform 8 of Tropomyosin alpha-1 chain OS	0.984589	0.982197	4				-2.04145	0.620385	4	-0.281718	1.00296	4
>sp|P04762|CATA_RAT Catalase OS	0.0901065	1.01403	23	0.428175	1.01126	23	0.546696	1.01782	23	0.29318	1.00613	23
>sp|P04764|ENOA_RAT Alpha-enolase OS	-1.26766	0.938887	10	-0.68321	1.00093	10	0.607745	1.01435	10	1.41917	0.793412	10
>sp|P04785|PDIA1_RAT Protein disulfide-isomerase OS	-1.35129	0.898778	20	0.558029	1.00658	20	1.5015	1.01047	20	0.995425	1.02028	20
>sp|P04797|G3P_RAT Glyceraldehyde-3-phosphate dehydrogenase OS	-0.934997	0.98729	13	-0.425311	1.01076	11	0.445735	1.02557	13	1.4632	1.00463	13
>sp|P04800|CP3A1_RAT Cytochrome P450 3A1 OS	0.505786	1.0304	8	4.68693	0.00115787	5	2.87715	0.17171	8	-3.56575	0.0168347	8
>sp|P04897|GNAI2_RAT Guanine nucleotide-binding protein G(i) subunit alpha-2 OS	0.421079	1.04042	1	-0.50549	1.00993	1	-0.384901	1.0086	1	0.493069	1.02441	1
>sp|P04903|GSTA2_RAT Glutathione S-transferase alpha-2 OS	0.000669954	1.00189	1	-0.646251	1.00611	1	-0.110109	0.990278	1	0.94648	0.971303	1
>sp|P04904|GSTA3_RAT Glutathione S-transferase alpha-3 OS	-1.53888	0.842884	4	-2.53046	0.231991	4	-0.335301	1.00842	4	2.81256	0.120936	4
>sp|P04905|GSTM1_RAT Glutathione S-transferase Mu 1 OS	-2.14187	0.566659	14	0.52427	1.01432	14	1.19251	1.01449	14	-0.856505	0.974816	14
>sp|P04906|GSTP1_RAT Glutathione S-transferase P OS	0.548881	1.01733	1	-2.11415	0.439838	1	0.205173	1.0027	1	4.10492	0.00273686	1
>sp|P04937|FINC_RAT Fibronectin OS	-0.257901	1.01181	5	0.372594	1.01611	5	0.0905447	0.991256	5	-0.919007	0.972476	5
>sp|P05065|ALDOA_RAT Fructose-bisphosphate aldolase A OS	-3.15469	0.139866	1	-1.65695	0.740339	1	1.46314	0.98403	1	0.9732	0.958315	1
>sp|P05178|CP2C6_RAT Cytochrome P450 2C6 OS	-0.271192	1.01281	9	-1.49874	0.807506	9	-1.04133	1.0002	9	0.547325	1.0267	9
>sp|P05179|CP2C7_RAT Cytochrome P450 2C7 OS	-0.248985	1.01048	14	-1.59914	0.780202	14	0.139471	1.00044	14	3.75693	0.00963269	14
>sp|P05182|CP2E1_RAT Cytochrome P450 2E1 OS	1.77544	0.733428	11	0.325762	1.01261	11	-0.551327	1.01218	11	-0.00258124	1.0004	11
>sp|P05183|CP3A2_RAT Cytochrome P450 3A2 OS	1.47172	0.86115	4	5.61826	8.05322e-06	7	3.501	0.0342585	4	-4.09311	0.00265855	4
>sp|P05197|EF2_RAT Elongation factor 2 OS	0.000131711	1.0005	21	0.108232	0.996126	21	0.323981	1.00908	21	0.605978	1.01997	21
>sp|P05426|RL7_RAT 60S ribosomal protein L7 OS	0.216662	1.01805	10	-0.970194	0.970851	10	-0.951704	0.973452	10	0.269066	1.00276	10
>sp|P05544|SPA3L_RAT Serine protease inhibitor A3L OS	0.274204	1.01219	1	4.01179	0.00718809	1	2.22857	0.512436	1	-2.74922	0.127649	1
>sp|P05545|SPA3K_RAT Serine protease inhibitor A3K OS	-0.317067	1.01592	3	2.37055	0.287978	3	1.89795	0.721734	3	-1.58489	0.700371	3
>sp|P05554|CEBPA_RAT CCAAT/enhancer-binding protein alpha OS	1.38255	0.889971	1	0.436964	1.00984	1	-1.09908	0.997382	1	-0.760723	1.01916	1
>sp|P05712|RAB2A_RAT Ras-related protein Rab-2A OS	0.873241	0.997961	1	0.655333	1.00999	1	-0.330903	1.00703	1	-0.514679	1.02754	1
>sp|P05765|RS21_RAT 40S ribosomal protein S21 OS	0.310637	1.01423	5	-0.578113	1.01023	5	-0.764757	1.00086	5	-0.17565	1.004	5
>sp|P05783|K1C18_HUMAN Keratin, type I cytoskeletal 18 OS	0.774388	1.01484	1	0.339955	1.01289	1	0.887447	0.981072	1	1.90039	0.493543	1
>sp|P06214|HEM2_RAT Delta-aminolevulinic acid dehydratase OS	0.694526	1.01649	1	1.12191	0.932569	1	1.05526	1.00566	1	0.731945	1.02288	1
>sp|P06238|A2MG_RAT Alpha-2-macroglobulin OS				1.97358	0.528613	1
>sp|P06399|FIBA_RAT Fibrinogen alpha chain OS	1.17503	0.954163	4	-0.847958	0.992639	4	-2.88126	0.184011	4	-3.46848	0.0242858	4
>sp|P06685|AT1A1_RAT Sodium/potassium-transporting ATPase subunit alpha-1 OS	1.92586	0.663086	7	-0.160958	1.01142	7	-0.765346	1.00007	7	0.820929	0.99343	7
>sp|P06757|ADH1_RAT Alcohol dehydrogenase 1 OS	-1.83264	0.713415	12	-2.87701	0.155919	12	-0.871104	0.999827	12	2.44799	0.233299	12
>sp|P06761|GRP78_RAT 78 kDa glucose-regulated protein OS	-0.931383	0.984159	24	0.316663	1.01128	24	-0.113914	0.993637	24	-2.76432	0.12866	24
>sp|P06866|HPT_RAT Haptoglobin OS	-0.755577	1.00832	1	-0.935386	0.96979	1	-0.453639	1.01835	1	-0.184963	1.00558	1
>sp|P07153|RPN1_RAT Dolichyl-diphosphooligosaccharide--protein glycosyltransferase subunit 1 OS	0.293589	1.01601	22	0.30056	1.01631	22	0.178292	0.997791	22	-0.142649	1.00334	22
>sp|P07340|AT1B1_RAT Sodium/potassium-transporting ATPase subunit beta-1 OS	0.681445	1.02463	1	-0.281397	1.01478	1	0.00680806	1.00072	1	1.27017	0.858384	1
>sp|P07379|PCKGC_RAT Phosphoenolpyruvate carboxykinase, cytosolic [GTP] OS	1.62002	0.805766	4	2.5065	0.239561	4	1.92996	0.726433	4	0.592974	1.01859	4
>sp|P07632|SODC_RAT Superoxide dismutase [Cu-Zn] OS	-0.0711746	1.00655	5	-0.215268	1.01715	5	0.503109	1.00787	5	1.80953	0.583054	5
>sp|P07633|PCCB_RAT Propionyl-CoA carboxylase beta chain, mitochondrial OS	0.24475	1.01306	11	0.838067	0.991621	11	0.548158	1.01379	11	-0.457466	1.02764	11
>sp|P07687|HYEP_RAT Epoxide hydrolase 1 OS	0.752859	1.00788	20	-2.9185	0.146842	20	-2.23708	0.520342	20	1.79572	0.827452	20
>sp|P07724|ALBU_MOUSE Serum albumin OS	-3.71698	0.0837214	2	3.59996	0.730105	2	4.41506	0.00167834	2	-3.59336	0.0138949	2
>sp|P07756|CPSM_RAT Carbamoyl-phosphate synthase [ammonia], mitochondrial OS	-2.4301	0.384099	93	0.0919675	0.99567	93	1.26713	1.03522	93	0.416538	1.00684	93
>sp|P07824|ARGI1_RAT Arginase-1 OS	-0.940234	0.989825	19	-0.018545	0.997751	19	0.768839	1.02491	19	1.00184	1.02058	19
>sp|P07867|LIPC_RAT Hepatic triacylglycerol lipase OS	-0.249242	1.01177	1	0.735516	0.996876	1	1.43609	0.978038	1	0.773379	1.01194	1
>sp|P07872|ACOX1_RAT Peroxisomal acyl-coenzyme A oxidase 1 OS	1.70614	0.757928	18	2.304	0.328162	18	1.46857	0.973869	18	0.0164894	1.0029	18
>sp|P07895|SODM_RAT Superoxide dismutase [Mn], mitochondrial OS	-1.16605	0.954748	6	-0.289327	1.01479	6	-1.03643	1.00165	6	-3.44389	0.0245059	6
>sp|P07896|ECHP_RAT Peroxisomal bifunctional enzyme OS	1.16646	0.945504	45	0.943662	0.979153	45	0.4617	1.01711	45	0.0783776	1.00898	45
>sp|P08010|GSTM2_RAT Glutathione S-transferase Mu 2 OS	-0.764229	1.0146	18	0.335719	1.01311	18	0.986794	0.989486	18	0.852278	0.98303	18
>sp|P08011|MGST1_RAT Microsomal glutathione S-transferase 1 OS	0.536189	1.0218	7	-0.460169	1.01203	7	-0.385774	1.01035	7	0.520617	1.03019	7
>sp|P08082|CLCB_RAT Clathrin light chain B OS	0.264723	1.0137	1	-0.190526	1.01916	1	-0.406541	1.01713	1	-0.012811	1.00212	1
>sp|P08290|ASGR2_RAT Asialoglycoprotein receptor 2 OS	0.721685	1.01063	1	0.873945	0.990973	1	0.44746	1.02041	1	0.214063	1.00427	1
>sp|P08430|UD16_RAT UDP-glucuronosyltransferase 1-6 OS	0.39688	1.03033	3	-1.14697	0.914658	3	-0.810283	0.9888	3	1.12682	0.895841	3
>sp|P08461|ODP2_RAT Dihydrolipoyllysine-residue acetyltransferase component of pyruvate dehydrogenase complex, mitochondrial OS	-0.679951	1.02275	6	-0.722186	0.991415	6	0.850748	0.993998	6	3.19132	0.0469388	6
>sp|P08503|ACADM_RAT Medium-chain specific acyl-CoA dehydrogenase, mitochondrial OS	-0.673267	1.0188	9	0.543327	1.00733	9	0.357452	1.0051	9	-1.46461	0.78208	9
>sp|P08516|CP4AA_RAT Cytochrome P450 4A10 OS	1.91748	0.651877	2	1.58759	0.788537	2	0.314164	1.00659	2	0.0207058	1.00388	2
>sp|P08541|UD2B2_RAT UDP-glucuronosyltransferase 2B2 OS	3.16106	0.136841	6	-2.55068	0.218957	4	-2.10109	0.591214	6	5.32086	1.29019e-05	6
>sp|P08542|UDB17_RAT UDP-glucuronosyltransferase 2B17 OS	-2.2893	0.467831	10	-1.02844	0.957078	10	0.604523	1.00931	10	1.09721	0.908877	10
>sp|P08649|CO4_RAT Complement C4 OS	0.888535	0.9952	6	-1.42483	0.841575	6	-2.03178	0.617817	6	-0.648399	1.01226	6
>sp|P08683|CP2CB_RAT Cytochrome P450 2C11 OS	-0.411512	1.03576	17	3.76973	0.0194943	17	2.86319	0.166328	17	-3.11445	0.0554231	17
>sp|P08779|K1C16_HUMAN Keratin, type I cytoskeletal 16 OS	0.768867	1.0125	1	0.577075	1.00824	1	-0.0963975	0.997637	1	-0.158167	1.00233	1
>sp|P09006|SPA3N_RAT Serine protease inhibitor A3N OS	0.635446	1.02306	6	-0.552191	1.00619	6	-1.48227	0.97327	6	-1.58714	0.697202	6
>sp|P09034|ASSY_RAT Argininosuccinate synthase OS	-0.558463	1.01661	24	0.267383	1.01613	24	0.873598	1.01123	24	0.537709	1.01339	24
>sp|P09118|URIC_RAT Uricase OS	-0.117093	1.01477	1	-0.561116	1.00606	1	-0.618208	1.02377	1	-0.257559	1.00148	1
>sp|P09495|TPM4_RAT Tropomyosin alpha-4 chain OS	-1.33754	0.904674	5	-0.990623	0.963301	5	0.918347	0.99963	5	2.57074	0.179138	5
>sp|P09527|RAB7A_RAT Ras-related protein Rab-7a OS	0.565087	1.01842	4	0.292716	1.01618	4	-0.0841265	0.993442	4	-0.12018	1.00524	4
>sp|P09606|GLNA_RAT Glutamine synthetase OS	-0.416536	1.03973	4	1.67746	0.73616	4	1.74998	0.840497	4	-0.599874	1.01702	4
>sp|P09811|PYGL_RAT Glycogen phosphorylase, liver form OS	-2.6346	0.253323	13	-0.601227	1.00731	13	1.10534	1.00786	13	1.2746	0.865215	13
>sp|P09875|UD2B1_RAT UDP-glucuronosyltransferase 2B1 OS	1.25225	0.935844	6	-1.3494	0.865317	6	-1.66858	0.91056	6	0.683634	1.02502	6
>sp|P09895|RL5_RAT 60S ribosomal protein L5 OS	-0.0325956	1.00561	9	-0.895259	0.976313	9	-0.790007	0.989242	9	-0.0938342	1.0071	9
>sp|P0C169|H2A1C_RAT Histone H2A type 1-C OS	-2.79384	0.232837	4	-2.01349	0.511005	4	0.666449	1.00408	4	2.09928	1.02407	4
>sp|P0C2X9|AL4A1_RAT Delta-1-pyrroline-5-carboxylate dehydrogenase, mitochondrial OS	0.465408	1.03438	9	0.902205	0.980484	9	0.946821	1.01119	9	-0.127181	1.00804	9
>sp|P0C5E3|PALLD_RAT Palladin (Fragment) OS	-0.262396	1.01364	1	0.381298	1.0138	1	0.542901	1.01465	1	-0.10985	1.00744	1
>sp|P0C5H9|MANF_RAT Mesencephalic astrocyte-derived neurotrophic factor OS	-0.440511	1.03503	4	-0.439472	1.01075	4	0.10831	0.989845	4	2.29192	1.00667	4
>sp|P0C606|SGF29_RAT SAGA-associated factor 29 homolog OS	-1.38171	0.882798	1	-0.583732	1.00995	1	0.624128	1.02354	1	0.153671	1.00399	1
>sp|P0CAX5|OPHN1_RAT Oligophrenin-1 OS	0.565328	1.01813	1	0.460926	1.01403	1	-0.414399	1.01787	1	-0.755931	1.0214	1
>sp|P10111|PPIA_RAT Peptidyl-prolyl cis-trans isomerase A OS	-0.952574	0.983756	9	-0.987684	0.964147	9	-0.340482	1.01059	9	0.534714	1.03192	9
>sp|P10536|RAB1B_RAT Ras-related protein Rab-1B OS	-0.271745	1.01226	1	-0.354234	1.01061	1	-0.562905	1.0147	1	-0.75433	1.0193	1
>sp|P10633|CP2D1_RAT Cytochrome P450 2D1 OS	-0.503054	1.03048	11	0.617777	1.00485	6	0.162337	1.00093	11	-1.99011	0.488031	11
>sp|P10634|CP2DQ_RAT Cytochrome P450 2D26 OS	1.43673	0.878225	6	0.845997	0.990919	6	0.684677	1.01327	6	1.69871	0.636587	6
>sp|P10637|TAU_MOUSE Microtubule-associated protein tau OS	0.0763513	1.0067	1	0.0291528	0.995217	1	-0.409432	1.01677	1	-0.622852	1.0143	1
>sp|P10715|CYC2_RAT Cytochrome c, testis-specific OS	-3.19096	0.123439	5	-0.518996	1.01233	5	1.90691	0.723794	5	1.50985	0.749565	5
>sp|P10719|ATPB_RAT ATP synthase subunit beta, mitochondrial OS	-0.327751	1.02565	38	11.3922	0.98907	38	1.107	1.01217	38	0.230594	1.00795	38
>sp|P10760|SAHH_RAT Adenosylhomocysteinase OS	-1.14498	0.945954	14	0.953181	0.987208	14	1.47473	0.974807	14	0.22963	1.00609	14
>sp|P10860|DHE3_RAT Glutamate dehydrogenase 1, mitochondrial OS	-3.51389	0.0638522	37	-0.968491	0.973334	35	4.22715	0.93414	37	4.22715	0.0881449	37
>sp|P10867|GGLO_RAT L-gulonolactone oxidase OS	1.24052	0.942318	2	2.30318	0.31999	2	0.639866	1.01944	2	-1.65652	0.660538	2
>sp|P10888|COX41_RAT Cytochrome c oxidase subunit 4 isoform 1, mitochondrial OS	2.06221	0.605757	8	1.05015	0.959677	8	0.212213	1.00128	8	0.554052	1.02406	8
>sp|P11030|ACBP_RAT Acyl-CoA-binding protein OS	-0.126808	1.01926	3	-0.841574	0.989695	3	0.682164	1.01269	3	2.91918	0.090467	3
>sp|P11232|THIO_RAT Thioredoxin OS	-1.30703	0.919325	1	-1.39302	0.848552	1	0.0307578	0.999434	1	0.662905	1.01603	1
>sp|P11240|COX5A_RAT Cytochrome c oxidase subunit 5A, mitochondrial OS	1.98859	0.633767	7	1.2356	0.86747	7	1.25266	1.0301	7	2.45931	0.837746	7
>sp|P11348|DHPR_RAT Dihydropteridine reductase OS	-0.482117	1.03125	3	0.723932	0.995437	3	0.814604	0.990141	3	-0.234959	1.00481	3
>sp|P11442|CLH_RAT Clathrin heavy chain 1 OS	0.41442	1.03729	29	-1.04298	0.955522	29	-1.48585	0.950717	29	-1.30852	0.857871	29
>sp|P11499|HS90B_MOUSE Heat shock protein HSP 90-beta OS	-0.1222	1.01712	1	0.72375	0.995674	1	0.392041	1.01356	1	-0.619169	1.01062	1
>sp|P11507|AT2A2_RAT Sarcoplasmic/endoplasmic reticulum calcium ATPase 2 OS	1.28062	0.928127	6	0.752693	1.00833	6	-0.43468	1.02209	6	-1.19867	0.85717	6
>sp|P11510|CP2CC_RAT Cytochrome P450 2C12, female-specific OS	6.14849	1.30011e-06	2	-8.26639	0	2	-8.99472	0	2	0.366613	1.01168	2
>sp|P11517|HBB2_RAT Hemoglobin subunit beta-2 OS	-1.89989	0.66647	4	-3.98448	0.00734307	4	-0.466718	1.01704	4	5.24552	1.61691e-05	4
>sp|P11598|PDIA3_RAT Protein disulfide-isomerase A3 OS	0.568708	1.00702	28	0.749246	1.00357	28	0.345836	1.00774	28	0.129265	1.01883	28
>sp|P11661|NU5M_RAT NADH-ubiquinone oxidoreductase chain 5 OS	1.26405	0.929358	1	1.39868	0.847616	1	0.257265	1.0069	1	-0.261948	1.00266	1
>sp|P11711|CP2A1_RAT Cytochrome P450 2A1 OS	1.34069	0.907782	13	-1.6858	0.733797	10	-1.76237	0.818317	13	0.853063	0.98649	13
>sp|P11862|GAS2_MOUSE Growth arrest-specific protein 2 OS	-1.1434	0.935685	6	-1.42785	0.845113	6	-0.768751	0.999664	6	1.20564	0.995048	6
>sp|P11883|AL3A1_RAT Aldehyde dehydrogenase, dimeric NADP-preferring OS	0.375196	1.01582	1	1.32391	0.858273	1	0.36606	1.00911	1	-1.0821	0.912347	1
>sp|P11884|ALDH2_RAT Aldehyde dehydrogenase, mitochondrial OS	-2.10389	0.585325	13	0.469153	1.01432	13	1.39659	0.997301	13	-0.187889	1.00947	13
>sp|P11915|NLTP_RAT Non-specific lipid-transfer protein OS	-1.01352	0.973646	4	-1.11282	0.940383	4	0.00901608	1.00081	4	0.631358	1.01439	4
>sp|P11951|CX6C2_RAT Cytochrome c oxidase subunit 6C-2 OS	-0.747628	1.00811	1	-0.238231	1.01691	1	-0.136892	0.997216	1	-0.91513	0.973112	1
>sp|P11960|ODBA_RAT 2-oxoisovalerate dehydrogenase subunit alpha, mitochondrial (Fragment) OS	0.393288	1.02872	2	1.25485	0.866144	2	-0.142081	0.999506	2	-1.79331	0.589193	2
>sp|P11980|KPYM_RAT Pyruvate kinase isozymes M1/M2 OS	0.121457	1.0164	1	0.598864	1.00799	1	1.23866	1.03655	1	1.22185	0.861585	1
>sp|P12001|RL18_RAT 60S ribosomal protein L18 OS	-1.56855	0.832357	5	-1.75182	0.716528	5	-0.904442	0.987919	5	-0.262879	1.00175	5
>sp|P12007|IVD_RAT Isovaleryl-CoA dehydrogenase, mitochondrial OS	0.0890587	1.01094	6	1.90878	0.587526	6	1.3502	1.01311	6	-1.22622	0.867633	6
>sp|P12075|COX5B_RAT Cytochrome c oxidase subunit 5B, mitochondrial OS	-0.0300841	1.0058	3	-0.121381	0.999775	3	0.736376	1.01269	3	1.48541	0.766997	3
>sp|P12336|GTR2_RAT Solute carrier family 2, facilitated glucose transporter member 2 OS	0.790633	1.01549	1	-1.49806	0.799914	1	-1.57846	0.935235	1	1.00181	0.955188	1
>sp|P12346|TRFE_RAT Serotransferrin OS	-1.12319	0.945917	17	-0.899907	0.983749	17	-0.326883	1.01265	17	-0.154765	1.01592	17
>sp|P12749|RL26_RAT 60S ribosomal protein L26 OS	0.67449	1.02605	6	-1.12494	0.927992	6	-1.38087	1.00391	6	0.0221051	1.00654	6
>sp|P12785|FAS_RAT Fatty acid synthase OS	-0.322219	1.02404	7	-1.24517	0.867868	7	0.877513	1.00523	7	4.59866	0.000431603	7
>sp|P12928|KPYR_RAT Pyruvate kinase isozymes R/L OS	0.184684	1.02293	8	0.734589	0.994241	8	1.86495	0.743513	8	3.35696	0.0290863	8
>sp|P12938|CP2D3_RAT Cytochrome P450 2D3 OS	1.20055	0.967678	7	0.801831	1.01412	10	0.367515	1.01021	7	0.687499	1.02652	7
>sp|P12939|CP2DA_RAT Cytochrome P450 2D10 OS				0.0883903	0.99639	1
>sp|P13084|NPM_RAT Nucleophosmin OS	-0.970102	0.985853	7	-1.33699	0.852528	7	-1.54533	0.965067	7	-0.729899	1.02148	7
>sp|P13086|SUCA_RAT Succinyl-CoA ligase [ADP/GDP-forming] subunit alpha, mitochondrial OS	-1.509	0.854999	13	0.218722	1.01834	13	1.15593	1.04346	13	0.790322	1.00758	13
>sp|P13107|CP2B3_RAT Cytochrome P450 2B3 OS	2.75246	0.250852	6	4.09276	0.00593211	6	2.34432	0.418841	6	0.0402014	1.00764	6
>sp|P13108|CP2D4_RAT Cytochrome P450 2D4 OS				0.30176	1.01509	1
>sp|P13221|AATC_RAT Aspartate aminotransferase, cytoplasmic OS	1.12581	0.948114	4	3.39647	0.0495629	4	1.86201	0.732297	4	-2.4583	0.226708	4
>sp|P13255|GNMT_RAT Glycine N-methyltransferase OS	-0.0471171	1.00432	4	2.85192	0.157765	4	3.03112	0.136612	4	0.619239	1.01289	4
>sp|P13286|PHKG1_RAT Phosphorylase b kinase gamma catalytic chain, skeletal muscle isoform OS	-1.50126	0.844665	1	-0.392859	1.01727	1	0.692255	1.01113	1	0.177404	1.006	1
>sp|P13383|NUCL_RAT Nucleolin OS	-3.13805	0.127865	15	-1.78782	0.680962	15	-0.822722	0.995471	15	-1.74747	0.600111	15
>sp|P13437|THIM_RAT 3-ketoacyl-CoA thiolase, mitochondrial OS	-0.654471	1.01945	21	0.953704	1.00541	21	0.795563	1.00699	21	-1.7947	0.587405	21
>sp|P13444|METK1_RAT S-adenosylmethionine synthase isoform type-1 OS	-1.86426	0.696083	7	-0.088858	0.997913	7	1.17619	1.0303	7	0.792407	1.00473	7
>sp|P13471|RS14_RAT 40S ribosomal protein S14 OS	-0.147261	1.02338	5	-0.741232	1.00233	5	-0.608626	1.01676	5	0.0542031	1.0057	5
>sp|P13645|K1C10_HUMAN Keratin, type I cytoskeletal 10 OS	-2.67695	0.256012	11	-1.49826	0.7996	10	0.489508	1.01258	11	2.83933	0.267807	11
>sp|P13646|K1C13_HUMAN Keratin, type I cytoskeletal 13 OS	-0.766834	1.01106	1				0.280293	1.00319	1	3.37675	0.0234145	1
>sp|P13647|K2C5_HUMAN Keratin, type II cytoskeletal 5 OS	-2.70089	0.25418	1	-2.37699	0.288605	1	0.313161	1.00113	1	0.937197	0.94109	1
>sp|P13721|SIAT1_RAT Beta-galactoside alpha-2,6-sialyltransferase 1 OS	-0.702419	1.01646	2	-0.367806	1.01686	2	-0.190264	1.00264	2	-0.650659	1.01676	2
>sp|P13803|ETFA_RAT Electron transfer flavoprotein subunit alpha, mitochondrial OS	-0.391221	1.02822	11	0.884673	0.980461	11	0.763532	1.0025	11	-0.678186	1.01787	11
>sp|P14046|A1I3_RAT Alpha-1-inhibitor 3 OS	0.261924	1.0141	7	0.843618	0.989798	6	0.303787	1.00803	7	-1.71791	0.622136	7
>sp|P14141|CAH3_RAT Carbonic anhydrase 3 OS	-0.500986	1.02772	10	5.92572	8.81145e-05	10	6.16745	0.000386787	10	-1.18812	0.836866	10
>sp|P14408|FUMH_RAT Fumarate hydratase, mitochondrial OS	0.588318	1.02126	5	1.17814	0.893937	5	0.728655	1.01345	5	-0.282486	1.00459	5
>sp|P14427|HA14_MOUSE H-2 class I histocompatibility antigen, D-P alpha chain OS	0.618879	1.02253	1	0.284012	1.01217	1	0.158648	0.999322	1	0.494114	1.02841	1
>sp|P14480|FIBB_RAT Fibrinogen beta chain OS	1.14441	0.940444	4	-0.0813314	0.996013	4	-2.0757	0.60452	4	-2.68786	0.147829	4
>sp|P14604|ECHM_RAT Enoyl-CoA hydratase, mitochondrial OS	-0.569121	1.01792	12	0.779221	1.01233	12	1.25193	1.02217	12	-0.489759	1.02308	12
>sp|P14668|ANXA5_RAT Annexin A5 OS	0.489352	1.02794	1	1.12808	0.931203	1	0.51061	1.00942	1	-0.408482	1.00368	1
>sp|P14669|ANXA3_RAT Annexin A3 OS	-0.493073	1.03182	1	0.573985	1.00981	1	0.942163	0.977036	1	-0.0772393	1.00995	1
>sp|P14740|DPP4_RAT Dipeptidyl peptidase 4 OS	1.53511	0.842238	6	-0.317265	1.01067	6	-1.29543	1.00428	6	-0.516975	1.02804	6
>sp|P14882|PCCA_RAT Propionyl-CoA carboxylase alpha chain, mitochondrial OS	0.848307	1.00371	6	0.722261	0.993827	6	0.169027	0.999113	6	-0.304497	1.00771	6
>sp|P14942|GSTA4_RAT Glutathione S-transferase alpha-4 OS	-1.733	0.767823	2	-0.609719	1.00692	2	0.582976	1.01608	2	-0.0468535	1.00664	2
>sp|P15149|CP2A2_RAT Cytochrome P450 2A2 OS	0.925763	0.983988	3	2.08096	1.01192	5	2.08489	0.602902	3	-1.82966	0.575243	3
>sp|P15385|KCNA4_RAT Potassium voltage-gated channel subfamily A member 4 OS	-0.427395	1.04011	1	1.42758	0.845543	1	0.758277	1.00125	1	-1.75754	0.603831	1
>sp|P15650|ACADL_RAT Long-chain specific acyl-CoA dehydrogenase, mitochondrial OS	0.309254	1.01154	8	2.09467	0.451151	8	1.11086	1.01058	8	-1.84264	0.564787	8
>sp|P15651|ACADS_RAT Short-chain specific acyl-CoA dehydrogenase, mitochondrial OS	0.161532	1.02397	9	1.33294	0.858759	9	0.956289	0.977117	9	-0.650137	1.01373	9
>sp|P15709|ST2A1_RAT Bile salt sulfotransferase OS	0.276267	1.01252	1	-0.835558	0.990711	1	-0.299488	1.00744	1	1.29248	0.861113	1
>sp|P15864|H12_MOUSE Histone H1.2 OS	0.928293	0.985302	2	-2.50404	0.233012	2	-2.90924	0.184096	2	0.351875	1.01316	2
>sp|P15865|H12_RAT Histone H1.2 OS	0.634285	1.02213	13	-2.18616	0.40765	13	-1.66042	0.885063	13	0.591866	1.01535	13
>sp|P15999|ATPA_RAT ATP synthase subunit alpha, mitochondrial OS	-0.129699	1.01876	34	0.660336	1.00365	34	0.569906	1.01735	34	-0.817263	0.989655	34
>sp|P16015|CAH3_MOUSE Carbonic anhydrase 3 OS	-0.703423	1.01773	1	2.43188	0.272654	1	2.79425	0.179968	1	-0.470604	1.02879	1
>sp|P16036|MPCP_RAT Phosphate carrier protein, mitochondrial OS	-1.07595	0.959547	9	0.0955248	0.998647	9	-0.0267783	0.99891	9	-1.97704	0.48455	9
>sp|P16086|SPTA2_RAT Spectrin alpha chain, brain OS	1.11251	0.947905	48	-0.0973494	0.999021	48	-0.253173	1.01428	48	0.731828	1.00509	48
>sp|P16232|DHI1_RAT Corticosteroid 11-beta-dehydrogenase isozyme 1 OS	-2.11639	0.585068	11	-2.01018	0.51506	11	-0.756855	0.999037	11	0.209218	1.00435	11
>sp|P16303|CES3_RAT Carboxylesterase 3 OS	-1.43993	0.87912	9	2.12015	0.440072	9	1.7019	0.864343	9	-2.76718	0.127536	9
>sp|P16391|HA12_RAT RT1 class I histocompatibility antigen, AA alpha chain OS	1.19251	0.95654	1	2.75387	0.175633	1	1.96345	0.672002	1	0.220254	1.00592	1
>sp|P16409|MYL3_RAT Myosin light chain 3 OS	-0.378655	1.01477	1	-1.09997	0.940131	1	-0.981335	0.977478	1	-0.299093	1.00579	1
>sp|P16617|PGK1_RAT Phosphoglycerate kinase 1 OS	-1.011	0.977407	7	0.409987	1.01302	7	1.46264	0.984969	7	1.53074	0.745816	7
>sp|P16636|LYOX_RAT Protein-lysine 6-oxidase OS	1.02287	0.982047	1	-0.4341	1.013	1	-0.363704	1.00548	1	1.52621	0.741646	1
>sp|P16638|ACLY_RAT ATP-citrate synthase OS	1.68398	0.773981	2	1.95008	0.544251	2	2.55989	0.283754	2	2.93599	0.0899933	2
>sp|P16970|ABCD3_RAT ATP-binding cassette sub-family D member 3 OS	0.703835	1.0211	3	1.1714	0.897992	3	-0.00307691	1.00001	3	-1.27595	0.86316	3
>sp|P17046|LAMP2_RAT Lysosome-associated membrane glycoprotein 2 OS	0.220683	1.01798	1	1.69821	0.721793	1	2.66769	0.229973	1	1.65596	0.661296	1
>sp|P17077|RL9_RAT 60S ribosomal protein L9 OS	-0.0340493	1.00567	5	-1.17776	0.894504	5	-0.407817	1.01853	5	1.61059	0.672602	5
>sp|P17132|HNRPC_RAT Heterogeneous nuclear ribonucleoprotein C (Fragment) OS	-0.703196	1.01803	1	-1.24444	0.868963	1	-0.3059	1.00836	1	0.700051	1.02191	1
>sp|P17178|CP27A_RAT Sterol 26-hydroxylase, mitochondrial OS	0.351941	1.01779	12	-0.972466	0.970943	12	-0.564914	1.0156	12	1.20068	0.860172	12
>sp|P17425|HMCS1_RAT Hydroxymethylglutaryl-CoA synthase, cytoplasmic OS	-5.21959	0.000296598	1	-1.17941	0.898084	1	2.7557	0.186724	1	-0.576416	1.01944	1
>sp|P17475|A1AT_RAT Alpha-1-antiproteinase OS	-0.843543	1.00429	5	0.972694	0.975755	5	0.971727	0.97733	5	-0.978847	0.955318	5
>sp|P17702|RL28_RAT 60S ribosomal protein L28 OS	0.495762	1.02867	3	-0.856098	0.98874	3	-1.13867	1.02062	3	-0.0426893	1.00687	3
>sp|P17764|THIL_RAT Acetyl-CoA acetyltransferase, mitochondrial OS	1.726	0.90006	20	2.3927	0.285005	20	1.67294	0.995258	20	-0.351581	0.998511	20
>sp|P17988|ST1A1_RAT Sulfotransferase 1A1 OS	-0.747934	1.0077	3	1.42387	0.843092	3	0.958931	0.978479	3	-2.07036	0.439375	3
>sp|P18163|ACSL1_RAT Long-chain-fatty-acid--CoA ligase 1 OS	-1.98468	0.62429	41	0.338913	1.0123	41	1.65839	0.949024	41	1.6283	0.972563	41
>sp|P18418|CALR_RAT Calreticulin OS	-1.03312	0.985691	11	0.898821	0.980588	11	1.18071	1.028	11	-0.536817	1.03271	11
>sp|P18420|PSA1_RAT Proteasome subunit alpha type-1 OS	0.412372	1.0348	1	0.360344	1.01184	1	0.0976625	0.990421	1	0.0754044	1.00951	1
>sp|P18445|RL27A_RAT 60S ribosomal protein L27a OS	1.93759	0.660014	4	-0.573657	1.01021	4	-1.48206	0.973648	4	0.524612	1.03304	4
>sp|P18484|AP2A2_RAT AP-2 complex subunit alpha-2 OS	-0.213343	1.01896	17	-0.303492	1.01576	17	-0.10419	0.991405	17	0.303427	1.00879	17
>sp|P18666|ML12B_RAT Myosin regulatory light chain 12B OS	-0.0637171	1.00575	3	-0.976037	0.976032	3	-0.678563	1.01226	3	0.471846	1.02736	3
>sp|P18757|CGL_RAT Cystathionine gamma-lyase OS	-1.28002	0.923927	14	-1.62246	0.756949	14	-0.455667	1.02098	14	1.14864	0.881269	14
>sp|P18886|CPT2_RAT Carnitine O-palmitoyltransferase 2, mitochondrial OS	1.72764	0.768079	5	2.57518	0.217288	5	1.35454	1.00516	5	-0.401766	1.00366	5
>sp|P19112|F16P1_RAT Fructose-1,6-bisphosphatase 1 OS	-0.501981	1.02862	7	-0.157166	1.00789	7	0.595911	1.01049	7	0.918841	0.972712	7
>sp|P19225|CP270_RAT Cytochrome P450 2C70 OS	0.211513	1.01694	4	1.36552	0.857883	4	1.95632	0.9922	4	1.81021	0.591229	4
>sp|P19234|NDUV2_RAT NADH dehydrogenase [ubiquinone] flavoprotein 2, mitochondrial OS	0.0553861	1.00441	2	0.315048	1.0113	2	0.215246	1.00066	2	-0.130937	1.0068	2
>sp|P19468|GSH1_RAT Glutamate--cysteine ligase catalytic subunit OS	0.608541	1.02376	1	0.236579	1.01623	1	0.0054765	0.999935	1	0.395363	1.00603	1
>sp|P19488|UDB37_RAT UDP-glucuronosyltransferase 2B37 OS	0.0602547	1.00545	4	-0.240452	1.01704	5	0.914275	0.990356	4	2.09452	1.02676	4
>sp|P19511|AT5F1_RAT ATP synthase subunit b, mitochondrial OS	1.0194	0.975957	7	0.995435	0.96493	7	-0.0592445	0.994341	7	-1.3463	0.824513	7
>sp|P19643|AOFB_RAT Amine oxidase [flavin-containing] B OS	0.322107	1.02415	12	-0.270057	1.01583	12	-1.12231	1.01811	12	-2.01797	0.465767	12
>sp|P19804|NDKB_RAT Nucleoside diphosphate kinase B OS	-0.22094	1.01925	1	-0.685938	0.999874	1	0.232743	1.00284	1	1.27087	0.864046	1
>sp|P19945|RLA0_RAT 60S acidic ribosomal protein P0 OS	-1.81529	0.727329	12	-1.55716	0.79463	12	-0.10648	0.994197	12	1.30893	1.01395	12
>sp|P20059|HEMO_RAT Hemopexin OS	1.72863	0.766462	2	0.625748	1.00632	2	-0.579903	1.01757	2	-0.00151597	1.00002	2
>sp|P20069|MPPA_RAT Mitochondrial-processing peptidase subunit alpha OS	-0.775209	1.01372	1	0.136005	1.00835	1	1.35511	1.01484	1	0.920746	0.974899	1
>sp|P20070|NB5R3_RAT NADH-cytochrome b5 reductase 3 OS	-0.929685	0.98329	7	-1.26782	0.86832	7	-0.322041	1.00772	7	0.606073	1.01985	7
>sp|P20280|RL21_RAT 60S ribosomal protein L21 OS	1.61125	0.809058	1	0.191148	1.02078	1	-0.508123	1.00718	1	0.977503	0.957256	1
>sp|P20611|PPAL_RAT Lysosomal acid phosphatase OS	-0.163861	1.02327	1	-0.521936	1.01501	1	0.120136	0.996283	1	0.873828	0.975961	1
>sp|P20673|ARLY_RAT Argininosuccinate lyase OS	1.37861	0.887847	9	1.03077	0.95906	9	-0.10267	0.989419	9	-1.1991	0.862472	9
>sp|P20759|IGHG1_RAT Ig gamma-1 chain C region OS	0.0325911	1.00562	1	0.800114	1.01214	1	-0.233925	1.00398	1	-1.43434	0.793538	1
>sp|P20760|IGG2A_RAT Ig gamma-2A chain C region OS	0.0830234	1.00952	6	-0.663347	1.00459	6	-2.70424	0.20614	6	-5.36406	1.32148e-05	6
>sp|P20761|IGG2B_RAT Ig gamma-2B chain C region OS	0.889205	0.99906	2	1.39948	0.854395	2	0.169298	1.00029	2	-1.27154	0.863038	2
>sp|P20762|IGG2C_RAT Ig gamma-2C chain C region OS	-0.270215	1.01141	1	0.534093	1.01099	1	-0.55127	1.01224	1	-2.24532	0.334918	1
>sp|P20767|LAC2_RAT Ig lambda-2 chain C region OS	1.98889	0.633313	1	3.3477	0.0544322	1	0.454106	1.01978	1	-2.30332	0.302877	1
>sp|P20788|UCRI_RAT Cytochrome b-c1 complex subunit Rieske, mitochondrial OS	-1.24791	0.937843	6	-0.211272	1.01575	6	-0.41478	1.01745	6	-2.61554	0.162557	6
>sp|P20812|CP2A3_RAT Cytochrome P450 2A3 OS	-0.107805	1.01409	2	-0.646916	1.00527	3	0.701423	1.01607	2	0.289629	1.00714	2
>sp|P20814|CP2CD_RAT Cytochrome P450 2C13, male-specific OS	0.981087	0.982023	2	1.44196	0.851041	2	-0.139326	0.999189	2	-1.73391	0.609438	2
>sp|P20816|CP4A2_RAT Cytochrome P450 4A2 OS	0.259313	1.01198	19	3.21519	0.0725664	18	0.121201	0.997381	19	-8.22972	9.01501e-14	19
>sp|P20817|CP4AE_RAT Cytochrome P450 4A14 OS	1.07129	0.958783	4	1.56114	0.797897	4	0.0815514	0.99367	4	-1.89847	0.541033	4
>sp|P21213|HUTH_RAT Histidine ammonia-lyase OS	0.0945014	1.01491	4	1.67199	0.734217	4	1.51036	0.990357	4	0.132183	1.00708	4
>sp|P21396|AOFA_RAT Amine oxidase [flavin-containing] A OS	0.656048	1.02112	8	-0.122273	1.00098	8	-0.988952	0.986255	8	-1.50748	0.745158	8
>sp|P21531|RL3_RAT 60S ribosomal protein L3 OS	-0.618626	1.01933	7	-1.05809	0.953394	7	-0.502034	1.00607	7	0.162995	1.00264	7
>sp|P21533|RL6_RAT 60S ribosomal protein L6 OS	0.665526	1.02131	9	-0.517529	1.011	9	-0.728994	1.013	9	0.223308	1.00529	9
>sp|P21575|DYN1_RAT Dynamin-1 OS	0.360345	1.01498	3	-0.911109	0.983638	3	-0.979649	0.976373	3	0.182023	1.00611	3
>sp|P21775|THIKA_RAT 3-ketoacyl-CoA thiolase A, peroxisomal OS	0.436879	1.03523	8	-0.324092	1.01433	8	0.123595	0.997999	8	1.63223	0.677536	8
>sp|P21807|PERI_RAT Peripherin OS	2.07276	0.607438	1	0.636212	1.00591	1	0.183923	0.999802	1	1.67936	0.646006	1
>sp|P21913|DHSB_RAT Succinate dehydrogenase [ubiquinone] iron-sulfur subunit, mitochondrial OS	0.0908435	1.01339	8	-0.606118	1.00465	8	-0.711336	1.01095	8	-0.300155	1.00717	8
>sp|P22071|3BHS1_RAT 3 beta-hydroxysteroid dehydrogenase/Delta 5-->4-isomerase type 1 OS	-0.0231371	1.00649	1	2.76307	0.180423	1	1.30699	1.01275	1	-2.76285	0.125749	1
>sp|P22072|3BHS2_RAT 3 beta-hydroxysteroid dehydrogenase/Delta 5-->4-isomerase type 2 OS	-0.496081	1.0314	1	2.47976	0.249494	1	1.53708	0.966835	1	-2.09149	0.426265	1
>sp|P22509|FBRL_RAT rRNA 2'-O-methyltransferase fibrillarin OS	-0.252964	1.0151	8	-0.179985	1.0145	8	0.311103	1.00557	8	0.979593	0.957682	8
>sp|P22734|COMT_RAT Catechol O-methyltransferase OS	-0.525968	1.02546	9	-0.347864	1.0139	9	1.07933	1.00884	9	2.63184	0.168192	9
>sp|P22791|HMCS2_RAT Hydroxymethylglutaryl-CoA synthase, mitochondrial OS	-1.15363	0.954226	21	1.65619	0.734823	21	1.98721	0.730912	21	0.101246	1.00676	21
>sp|P22985|XDH_RAT Xanthine dehydrogenase/oxidase OS	0.383096	1.0189	2	0.67915	0.997669	2	0.856546	0.999839	2	0.513264	1.02493	2
>sp|P23358|RL12_RAT 60S ribosomal protein L12 OS	0.577362	1.01785	6	-1.00811	0.956819	6	-1.05073	1.00641	6	0.411305	1.00518	6
>sp|P23457|DIDH_RAT 3-alpha-hydroxysteroid dehydrogenase OS	-0.525662	1.02583	9	0.0113232	0.999343	9	1.30507	1.01621	9	2.87769	0.0985707	9
>sp|P23562|B3AT_RAT Band 3 anion transport protein OS	2.43197	0.394259	4	-0.719462	0.992443	4	-2.91414	0.181233	4	-1.9331	0.517578	4
>sp|P23565|AINX_RAT Alpha-internexin OS	1.26681	0.932518	1	0.447635	1.0138	1	1.23249	1.04143	1	3.12104	0.0541983	1
>sp|P23576|GBRA2_RAT Gamma-aminobutyric acid receptor subunit alpha-2 OS	0.042989	1.00521	1	-0.239481	1.0157	1	-1.31963	1.0066	1	-1.82022	0.578294	1
>sp|P23680|SAMP_RAT Serum amyloid P-component OS	0.569113	1.01793	2	1.42665	0.84702	2	0.445093	1.02307	2	-1.23774	0.856913	2
>sp|P23965|ECI1_RAT Enoyl-CoA delta isomerase 1, mitochondrial OS	0.548995	1.01719	7	1.766	0.694895	7	0.532941	1.00621	7	-2.2635	0.327647	7
>sp|P24008|S5A1_RAT 3-oxo-5-alpha-steroid 4-dehydrogenase 1 OS	-0.673667	1.02079	2	-2.16101	0.413384	2	-0.845573	0.992036	2	1.63425	0.674726	2
>sp|P24049|RL17_RAT 60S ribosomal protein L17 OS	-0.358757	1.01493	3	-0.988973	0.962266	3	-0.166303	0.999459	3	1.2275	0.86575	3
>sp|P24050|RS5_RAT 40S ribosomal protein S5 OS	1.454	0.871453	4	-0.910536	0.979678	4	-1.35004	1.00281	4	0.847906	0.984556	4
>sp|P24270|CATA_MOUSE Catalase OS	-1.55011	0.841701	1	-0.846913	0.989645	1	0.122165	0.997894	1	-0.423141	1.00891	1
>sp|P24329|THTR_RAT Thiosulfate sulfurtransferase OS	-0.434046	1.03551	11	1.43218	0.846648	11	1.50608	0.984904	11	-0.135787	1.00527	11
>sp|P24368|PPIB_RAT Peptidyl-prolyl cis-trans isomerase B OS	-2.60604	0.275454	16	-1.64777	0.747737	16	-0.322629	1.00712	16	0.0800978	1.01018	16
>sp|P24464|CP4AC_RAT Cytochrome P450 4A12 OS				1.84209	0.631923	1
>sp|P24470|CP2CN_RAT Cytochrome P450 2C23 OS	-0.0149075	1.00512	14	0.985087	0.967946	14	0.98275	0.978997	14	-0.0017847	0.999807	14
>sp|P24473|GSTK1_RAT Glutathione S-transferase kappa 1 OS	0.656375	1.0244	3	0.131927	1.00115	3	-0.297698	1.0068	3	-0.0722886	1.00685	3
>sp|P24483|ADX_RAT Adrenodoxin, mitochondrial OS	0.186982	1.02226	1	-0.949182	0.979489	1	-0.398863	1.01624	1	1.16748	0.878969	1
>sp|P25093|FAAA_RAT Fumarylacetoacetase OS	-1.44427	0.878171	10	-0.0561687	0.994511	10	0.729176	1.01276	10	0.352489	1.01251	10
>sp|P25235|RPN2_RAT Dolichyl-diphosphooligosaccharide--protein glycosyltransferase subunit 2 OS	0.945294	1.00072	15	0.495473	1.01558	14	-0.135436	0.998589	15	0.356707	1.01333	15
>sp|P25304|AGRIN_RAT Agrin OS	-0.174273	1.02456	1	-1.72305	0.730661	1	-1.3385	1.01686	1	0.328076	1.01293	1
>sp|P25409|ALAT1_RAT Alanine aminotransferase 1 OS	0.151316	1.02398	2	1.30145	0.862252	2	1.13886	1.02535	2	-0.389567	1.00417	2
>sp|P25886|RL29_RAT 60S ribosomal protein L29 OS	-0.907742	0.988637	3	-1.52264	0.808735	2	-1.0298	0.991644	3	-0.109104	1.00604	3
>sp|P25977|UBF1_RAT Nucleolar transcription factor 1 OS	-0.601104	1.02259	2	-0.466788	1.01507	2	-0.373125	1.00957	2	-0.149042	1.00392	2
>sp|P26039|TLN1_MOUSE Talin-1 OS	0.0757549	1.00525	3	0.741419	1.00208	3	1.21285	1.03142	3	1.08487	0.913845	3
>sp|P26284|ODPA_RAT Pyruvate dehydrogenase E1 component subunit alpha, somatic form, mitochondrial OS	-0.673952	1.02295	3	-1.29315	0.858921	3	0.19338	1.00194	3	2.02993	0.464856	3
>sp|P26435|NTCP_RAT Sodium/bile acid cotransporter OS	0.977936	0.983129	1	-0.0581901	0.995317	1	-0.576989	1.01548	1	0.185923	1.00689	1
>sp|P26453|BASI_RAT Basigin OS	0.424331	1.0387	3	-0.174971	1.01485	3	-0.114706	0.992951	3	0.629328	1.01334	3
>sp|P26644|APOH_RAT Beta-2-glycoprotein 1 OS	-1.03468	0.98331	3	-1.66703	0.741847	3	-1.16911	1.03703	3	-0.620789	1.01332	3
>sp|P26772|CH10_RAT 10 kDa heat shock protein, mitochondrial OS	-1.2088	0.961604	6	0.53472	1.01336	6	1.39318	0.992377	6	0.633982	1.0147	6
>sp|P27046|MA2A1_MOUSE Alpha-mannosidase 2 OS	0.612049	1.01938	1	0.703887	0.998895	1	0.0972258	0.988834	1	-0.229202	1.0065	1
>sp|P27139|CAH2_RAT Carbonic anhydrase 2 OS	0.600799	1.02297	2	-0.757138	1.01321	2	0.201691	1.00154	2	2.68437	0.149379	2
>sp|P27364|3BHS5_RAT 3 beta-hydroxysteroid dehydrogenase type 5 OS	-1.42993	0.87113	4	2.0634	0.476315	4	1.96653	0.684275	4	-2.56895	0.174377	4
>sp|P27546|MAP4_MOUSE Microtubule-associated protein 4 OS	2.01909	0.619934	1	2.40639	0.283218	1	1.02794	0.994503	1	0.288965	1.0078	1
>sp|P27605|HPRT_RAT Hypoxanthine-guanine phosphoribosyltransferase OS	1.06837	0.963214	2	1.4771	0.818287	2	0.674643	1.01352	2	0.0197482	1.00466	2
>sp|P27653|C1TC_RAT C-1-tetrahydrofolate synthase, cytoplasmic OS	-3.39882	0.0861052	29	-2.37163	0.287136	29	-0.390741	1.01791	29	0.929226	1.02047	29
>sp|P27867|DHSO_RAT Sorbitol dehydrogenase OS	-1.53571	0.841237	11	-0.21462	1.01405	11	0.723782	1.00516	11	0.28275	1.00433	11
>sp|P28037|AL1L1_RAT Aldehyde dehydrogenase family 1 member L1 OS	0.137679	1.01929	23	-0.28741	1.01671	23	0.109912	0.991345	23	0.885933	0.974539	23
>sp|P28042|SSBP_RAT Single-stranded DNA-binding protein, mitochondrial OS	-0.784446	1.01247	5	-0.18277	1.01914	5	-0.14121	0.998898	5	-0.705218	1.01908	5
>sp|P28480|TCPA_RAT T-complex protein 1 subunit alpha OS	0.390769	1.02688	6	-1.18586	0.902707	6	-0.89335	0.99234	6	0.948362	0.973676	6
>sp|P28492|GLSL_RAT Glutaminase liver isoform, mitochondrial OS	0.643637	1.02232	4	0.457843	1.01274	4	0.173861	0.999694	4	0.094916	1.00819	4
>sp|P29117|PPIF_RAT Peptidyl-prolyl cis-trans isomerase F, mitochondrial OS	-1.04626	0.971485	2	1.09317	0.933015	2	2.10034	0.580465	2	0.564209	1.02754	2
>sp|P29147|BDH_RAT D-beta-hydroxybutyrate dehydrogenase, mitochondrial OS	-0.943233	0.985445	18	2.95682	0.285749	17	3.14572	0.178435	18	1.60424	0.681339	18
>sp|P29266|3HIDH_RAT 3-hydroxyisobutyrate dehydrogenase, mitochondrial OS	-0.426615	1.03807	2	0.756146	1.01182	2	0.373777	1.00887	2	-1.3802	0.819456	2
>sp|P29410|KAD2_RAT Adenylate kinase 2, mitochondrial OS	1.32525	0.91384	6	1.55065	0.795462	6	1.22902	1.04764	6	0.907165	0.973115	6
>sp|P29418|ATP5E_RAT ATP synthase subunit epsilon, mitochondrial OS	0.834247	0.997687	2	0.38179	1.01327	2	-0.737026	1.01182	2	-1.12523	0.892481	2
>sp|P29419|ATP5I_RAT ATP synthase subunit e, mitochondrial OS	-0.940191	0.984795	2	-0.702079	0.998751	2	-0.0309666	0.999264	2	0.0383636	1.00723	2
>sp|P29456|IL10_RAT Interleukin-10 OS	0.359478	1.01417	1	0.079072	0.992861	1	0.314683	1.00607	1	0.904496	0.972093	1
>sp|P29995|ITPR2_RAT Inositol 1,4,5-trisphosphate receptor type 2 OS	0.0813114	1.0077	1	1.26506	0.865914	1	1.32469	1.01432	1	0.181973	1.00615	1
>sp|P30427|PLEC_RAT Plectin OS	1.14733	0.948766	11	1.92487	0.566191	11	1.13786	1.02197	11	-0.0871603	1.01016	11
>sp|P30713|GSTT2_RAT Glutathione S-transferase theta-2 OS	-1.39599	0.897115	2	-1.59324	0.789562	2	0.272316	1.00632	2	1.77487	0.589921	2
>sp|P30839|AL3A2_RAT Fatty aldehyde dehydrogenase OS	-1.16311	0.952649	15	1.20878	0.884733	15	1.08057	1.01358	15	-1.69115	0.638402	15
>sp|P30904|MIF_RAT Macrophage migration inhibitory factor OS	-0.286828	1.01233	1	-1.71182	0.729505	1	-0.333535	1.00685	1	2.0454	0.45713	1
>sp|P31000|VIME_RAT Vimentin OS	1.50018	0.846439	8	0.710014	0.997189	8	1.30183	1.01219	8	3.62522	0.0146523	8
>sp|P31044|PEBP1_RAT Phosphatidylethanolamine-binding protein 1 OS	-0.820073	1.00108	2	-0.753998	1.01063	2	0.590475	1.01373	2	2.00626	0.478951	2
>sp|P31210|AK1D1_RAT 3-oxo-5-beta-steroid 4-dehydrogenase OS	-1.28569	0.935626	7	0.12184	0.999373	7	0.795156	0.995016	7	0.0571333	1.0065	7
>sp|P31399|ATP5H_RAT ATP synthase subunit d, mitochondrial OS	-0.643843	1.02205	8	-0.276452	1.0134	8	0.178442	1.0028	8	0.290819	1.00838	8
>sp|P31422|GRM3_RAT Metabotropic glutamate receptor 3 OS	-0.445066	1.03576	1	-0.13471	1.00407	1	0.440244	1.02266	1	0.346257	1.01295	1
>sp|P31977|EZRI_RAT Ezrin OS	-1.80383	0.732059	8	-0.581696	1.01242	8	0.377225	1.00876	8	0.014241	1.00097	8
>sp|P32089|TXTP_RAT Tricarboxylate transport protein, mitochondrial OS	0.401777	1.03427	6	-0.937592	0.971482	6	-1.00173	0.991498	6	0.217841	1.00595	6
>sp|P32198|CPT1A_RAT Carnitine O-palmitoyltransferase 1, liver isoform OS	2.81045	0.233793	14	2.27362	0.330961	14	-0.630928	1.02223	14	-4.40721	0.000895011	14
>sp|P32233|DRG1_MOUSE Developmentally-regulated GTP-binding protein 1 OS	-0.776006	1.0169	3	-0.403201	1.01771	3	0.0432917	0.996732	3	-0.141351	1.00449	3
>sp|P32551|QCR2_RAT Cytochrome b-c1 complex subunit 2, mitochondrial OS	-1.28583	0.935391	17	0.803524	1.01615	17	0.591868	1.01203	17	-2.13411	0.400918	17
>sp|P32755|HPPD_RAT 4-hydroxyphenylpyruvate dioxygenase OS	-1.54261	0.843637	12	0.997614	0.966979	12	1.34495	0.998179	12	-0.972001	0.954929	12
>sp|P33273|CP255_RAT Cytochrome P450 2C55 OS	-1.88705	0.661084	1	3.0572	0.113061	1	3.47552	0.0345428	1	-2.17881	0.375253	1
>sp|P33274|CP4F1_RAT Cytochrome P450 4F1 OS	0.397574	1.02957	3	1.6622	0.73231	2	1.24896	1.01832	3	-0.440273	1.02528	3
>sp|P35171|CX7A2_RAT Cytochrome c oxidase subunit 7A2, mitochondrial OS	0.218806	1.01826	2	0.302656	1.01661	2	0.118149	0.993977	2	-0.0498205	1.00611	2
>sp|P35213|1433B_RAT 14-3-3 protein beta/alpha OS	-1.15471	0.952531	3	-0.571379	1.0108	3	-0.837419	0.983808	3	-2.30727	0.299722	3
>sp|P35281|RAB10_RAT Ras-related protein Rab-10 OS	1.01705	0.9795	1	0.897544	0.977727	1	0.283569	1.01038	1	0.302818	1.00694	1
>sp|P35289|RAB15_RAT Ras-related protein Rab-15 OS	0.169268	1.02409	1	0.181499	1.01526	1	-5.13975	0.000111829	1	-8.78628	0	1
>sp|P35427|RL13A_RAT 60S ribosomal protein L13a OS	0.212522	1.01748	6	-0.951435	0.984647	6	-1.26041	1.02562	6	-0.681378	1.02145	6
>sp|P35434|ATPD_RAT ATP synthase subunit delta, mitochondrial OS	-1.93456	0.664656	2	-0.418869	1.01236	2	0.930106	0.977587	2	-0.0273116	1.00609	2
>sp|P35435|ATPG_RAT ATP synthase subunit gamma, mitochondrial OS	0.572687	1.02022	15	1.15939	0.902007	15	0.823812	1.00649	15	-0.000523048	1.00547	15
>sp|P35505|FAAA_MOUSE Fumarylacetoacetase OS	-0.712944	1.01957	1	0.759028	1.01753	1	1.07056	1.00737	1	-0.456183	1.02609	1
>sp|P35527|K1C9_HUMAN Keratin, type I cytoskeletal 9 OS	-0.393065	1.02896	18	-1.76699	0.693403	18	-0.591618	1.00758	18	2.46159	0.500984	18
>sp|P35565|CALX_RAT Calnexin OS	0.0582968	1.00325	6	-0.220298	1.01683	6	-0.000988797	0.999826	6	0.223879	1.00474	6
>sp|P35704|PRDX2_RAT Peroxiredoxin-2 OS	-0.371981	1.01661	4	-0.240516	1.01851	4	0.137768	0.998503	4	0.32468	1.01388	4
>sp|P35738|ODBB_RAT 2-oxoisovalerate dehydrogenase subunit beta, mitochondrial OS	0.605108	1.02455	3	-0.365517	1.01238	3	-0.0508389	0.996851	3	1.22306	0.866036	3
>sp|P35908|K22E_HUMAN Keratin, type II cytoskeletal 2 epidermal OS	-0.113754	1.01567	9	-1.51089	0.803168	9	0.507672	1.01156	9	4.2415	0.0014176	9
>sp|P36201|CRIP2_RAT Cysteine-rich protein 2 OS	-0.883629	0.997418	2	-1.31236	0.859491	2	-1.02465	0.993582	2	-0.705801	1.02232	2
>sp|P36380|CXB4_RAT Gap junction beta-4 protein OS	-1.71535	0.751089	1	-0.872656	0.988192	1	0.415717	1.01925	1	-0.169891	1.00567	1
>sp|P36511|UDB15_RAT UDP-glucuronosyltransferase 2B15 OS	-0.0892124	1.0128	7	-0.274265	1.01401	7	-0.280793	1.00591	7	-0.144091	1.00415	7
>sp|P36970|GPX41_RAT Phospholipid hydroperoxide glutathione peroxidase, mitochondrial OS	0.880751	0.996752	2	0.292283	1.01662	2	-0.180584	0.99784	2	0.209549	1.00404	2
>sp|P37199|NU155_RAT Nuclear pore complex protein Nup155 OS	0.269299	1.01232	1	1.06275	0.953944	1	1.00633	0.990272	1	0.213825	1.00449	1
>sp|P38652|PGM1_RAT Phosphoglucomutase-1 OS	0.444371	1.03655	4	0.891255	0.98196	4	0.697132	1.01384	4	-0.411027	1.00366	4
>sp|P38656|LA_RAT Lupus La protein homolog OS	-0.539599	1.02307	3	-1.3421	0.85677	3	-1.39605	0.998292	3	-0.946477	0.971307	3
>sp|P38659|PDIA4_RAT Protein disulfide-isomerase A4 OS	0.0059647	1.00313	8	1.16183	0.902327	8	0.290884	1.00794	8	-2.19787	0.36324	8
>sp|P38718|BR44_RAT Brain protein 44 OS	1.35077	0.89962	2	0.609227	1.00417	2	-1.78625	0.802807	2	-2.99096	0.0792354	2
>sp|P38918|ARK73_RAT Aflatoxin B1 aldehyde reductase member 3 OS	-0.525312	1.02412	2	1.76829	0.702792	2	2.21302	0.533333	2	0.183865	1.00441	2
>sp|P38983|RSSA_RAT 40S ribosomal protein SA OS	-0.978718	0.98197	9	-1.08824	0.940406	9	0.121199	1.00951	9	1.93362	1.02794	9
>sp|P39032|RL36_RAT 60S ribosomal protein L36 OS	1.34259	0.904683	1	-0.851445	0.992246	1	-1.18761	1.02436	1	0.86458	0.979634	1
>sp|P39052|DYN2_RAT Dynamin-2 OS	0.859382	1.00198	3	-0.637953	1.00953	3	-1.48871	0.982524	3	-0.737746	1.02483	3
>sp|P40615|DKC1_RAT H/ACA ribonucleoprotein complex subunit 4 OS	-0.00410401	1.00279	8	-1.11267	0.934671	8	-0.911167	0.988169	8	0.126637	1.00644	8
>sp|P41034|TTPA_RAT Alpha-tocopherol transfer protein OS	0.395203	1.02939	2	0.031008	0.99736	2	0.28276	1.00877	2	1.01538	0.940783	2
>sp|P41123|RL13_RAT 60S ribosomal protein L13 OS	0.400307	1.0359	3	-1.42884	0.851983	3	-1.57883	0.948836	3	0.10056	1.00736	3
>sp|P41562|IDHC_RAT Isocitrate dehydrogenase [NADP] cytoplasmic OS	-0.417296	1.03887	10	0.0593883	0.996189	10	1.01785	0.990186	10	1.7863	0.592402	10
>sp|P41777|NOLC1_RAT Nucleolar and coiled-body phosphoprotein 1 OS	0.355206	1.01694	1	-1.11093	0.937305	1	-1.71582	0.854596	1	-0.528722	1.03471	1
>sp|P42667|SC11A_RAT Signal peptidase complex catalytic subunit SEC11A OS	1.36134	0.890721	3	0.5084	1.01457	3	-0.387568	1.01383	3	-0.12025	1.00517	3
>sp|P43244|MATR3_RAT Matrin-3 OS	-1.45887	0.872889	6	-2.27955	0.331576	6	-1.09808	0.998974	6	0.748343	1.01893	6
>sp|P43278|H10_RAT Histone H1.0 OS	-0.077239	1.0079	5	-2.6114	0.209152	5	-2.40821	0.377778	5	0.127172	1.00597	5
>sp|P43428|G6PC_RAT Glucose-6-phosphatase OS	3.24759	0.120316	1	2.0992	0.456373	1	-0.694193	1.01119	1	-0.785938	1.00778	1
>sp|P45592|COF1_RAT Cofilin-1 OS	0.125021	1.01877	5	-0.777907	1.01413	5	-0.472656	1.0136	5	0.729547	1.02195	5
>sp|P45953|ACADV_RAT Very long-chain specific acyl-CoA dehydrogenase, mitochondrial OS	-0.193764	1.02256	10	1.06033	0.95379	10	0.886316	0.997511	10	0.273448	1.00898	10
>sp|P46462|TERA_RAT Transitional endoplasmic reticulum ATPase OS	-0.369434	1.01493	10	0.287238	1.01449	10	-0.196018	1.00169	10	-1.45597	0.781883	10
>sp|P46720|SO1A1_RAT Solute carrier organic anion transporter family member 1A1 OS	-0.0539309	1.00435	1	-0.245195	1.01778	1	1.48402	0.982746	1	2.16377	0.380793	1
>sp|P46953|3HAO_RAT 3-hydroxyanthranilate 3,4-dioxygenase OS	-0.38906	1.02691	5	-0.616129	1.00688	5	0.327251	1.01078	5	1.48182	0.772314	5
>sp|P47198|RL22_RAT 60S ribosomal protein L22 OS	-0.760096	1.00635	4	-1.03709	0.960636	4	-0.264687	1.00671	4	0.444914	1.02595	4
>sp|P47757-2|CAPZB_MOUSE Isoform 2 of F-actin-capping protein subunit beta OS	-0.360426	1.0149	1	-0.742998	1.00394	1	-0.244779	1.00658	1	0.354473	1.01305	1
>sp|P47758|SRPRB_MOUSE Signal recognition particle receptor subunit beta OS	-0.110874	1.01547	1	0.113261	0.996985	1	1.21978	1.03096	1	1.67328	0.64598	1
>sp|P47819|GFAP_RAT Glial fibrillary acidic protein OS	-3.97972	0.0285303	2	-1.34626	0.870251	2	2.9241	1.01305	2	5.54631	0.0719157	2
>sp|P48037|ANXA6_RAT Annexin A6 OS	0.906483	1.01383	16	0.132018	1.01127	16	-4.06834	0.00592226	16	-10.9328	0	16
>sp|P48199|CRP_RAT C-reactive protein OS	0.959926	0.983334	2	1.86187	0.622483	2	0.42332	1.02511	2	-1.37635	0.817875	2
>sp|P48437|PROX1_MOUSE Prospero homeobox protein 1 OS	-1.64357	0.801152	1	-0.403768	1.01709	1	0.161319	1.00185	1	-0.823538	0.994279	1
>sp|P48500|TPIS_RAT Triosephosphate isomerase OS	0.0398019	1.00596	7	0.192905	1.02133	7	0.336283	1.00995	7	0.500779	1.02063	7
>sp|P48675|DESM_RAT Desmin OS	-0.952976	0.983169	2	-0.513827	1.01128	2	0.352862	1.00816	2	0.424734	1.00717	2
>sp|P48679|LMNA_RAT Prelamin-A/C OS	-3.65063	0.108169	27	-0.294388	1.0161	27	1.0694	1.00921	27	-0.829871	0.975397	27
>sp|P48721|GRP75_RAT Stress-70 protein, mitochondrial OS	-0.439304	1.03444	18	0.441918	1.01082	18	0.378409	1.01588	18	-0.803752	0.974408	18
>sp|P48774|GSTM5_MOUSE Glutathione S-transferase Mu 5 OS	0.603844	1.02613	1	1.5762	0.796737	1	2.82657	0.173869	1	2.75783	0.127695	1
>sp|P49242|RS3A_RAT 40S ribosomal protein S3a OS	-0.200353	1.02155	16	-1.32119	0.857715	16	-0.859099	1.023	16	0.6425	1.0008	16
>sp|P49432|ODPB_RAT Pyruvate dehydrogenase E1 component subunit beta, mitochondrial OS	-1.54738	0.846253	7	-1.81344	0.661958	7	0.33625	1.00999	7	3.16229	0.0518803	7
>sp|P49890|ST1E6_RAT Estrogen sulfotransferase, isoform 6 OS	-0.558905	1.01934	1	4.23644	0.00379236	1	4.36284	0.00208753	1	-0.622528	1.01115	1
>sp|P49911|AN32A_RAT Acidic leucine-rich nuclear phosphoprotein 32 family member A OS	0.395083	1.02953	2	0.0963053	0.999919	2	0.157233	1.0006	2	0.42262	1.00669	2
>sp|P50115|S10A8_RAT Protein S100-A8 OS	0.636333	1.02193	1	-0.95332	0.987003	1	-2.17395	0.555242	1	-1.19895	0.862698	1
>sp|P50116|S10A9_RAT Protein S100-A9 OS	-0.106291	1.01338	1	-2.8996	0.155996	1	-3.57661	0.029788	1	-1.20742	0.86437	1
>sp|P50137|TKT_RAT Transketolase OS	-0.990554	0.978727	22	0.782969	1.01712	22	0.885554	0.99373	22	0.124694	1.02867	22
>sp|P50169|RDH3_RAT Retinol dehydrogenase 3 OS	0.895404	0.996625	4	1.73358	0.721859	5	0.866378	1.00175	4	-0.456953	1.02522	4
>sp|P50170|RDH2_RAT Retinol dehydrogenase 2 OS	1.69539	0.767322	4	1.70087	0.735525	2	0.189486	1.00118	4	-1.39359	0.80677	4
>sp|P50237|ST1C1_RAT Sulfotransferase 1C1 OS	-0.241773	1.01365	4	2.87794	0.155456	4	2.78915	0.175366	4	-0.404456	1.00258	4
>sp|P50398|GDIA_RAT Rab GDP dissociation inhibitor alpha OS	0.581387	1.02075	2	1.17229	0.896666	2	0.378183	1.00774	2	-0.319829	1.01209	2
>sp|P50554|GABT_RAT 4-aminobutyrate aminotransferase, mitochondrial OS	0.317409	1.01807	3	0.73295	0.996387	3	0.584105	1.01471	3	0.299563	1.00531	3
>sp|P50878|RL4_RAT 60S ribosomal protein L4 OS	-0.858044	1.00387	10	-1.17962	0.897764	10	-0.681677	1.01078	10	-0.0184147	1.00385	10
>sp|P51583|PUR6_RAT Multifunctional protein ADE2 OS	-0.33958	1.01958	1	0.487274	1.01311	1	1.05859	1.01331	1	0.457536	1.02756	1
>sp|P51635|AK1A1_RAT Alcohol dehydrogenase [NADP+] OS	-1.83478	0.710031	3	-0.28582	1.01432	3	1.48639	0.978276	3	1.12306	0.895631	3
>sp|P51647|AL1A1_RAT Retinal dehydrogenase 1 OS	1.61483	0.814344	5	-1.2014	0.89168	5	-2.69596	0.211471	5	0.520335	1.03052	5
>sp|P51802|CLCKB_RAT Chloride channel protein ClC-Kb OS	-0.627612	1.02339	2	0.237153	1.01796	2	0.746885	1.00686	2	-0.00857991	1.00241	2
>sp|P51869|CP4F4_RAT Cytochrome P450 4F4 OS				1.479	0.821065	1
>sp|P52164|MAX_RAT Protein max OS	-0.0449138	1.00488	1	0.277273	1.01416	1	0.52546	1.00765	1	0.317254	1.01304	1
>sp|P52303|AP1B1_RAT AP-1 complex subunit beta-1 OS	1.02564	0.981661	2	0.155486	1.00802	2	-0.0579513	0.995416	2	0.641067	1.01302	2
>sp|P52555|ERP29_RAT Endoplasmic reticulum resident protein 29 OS	-0.590307	1.02107	2	0.74976	1.00288	2	1.00483	0.992552	2	-0.315679	1.00963	2
>sp|P52759|UK114_RAT Ribonuclease UK114 OS	-2.65463	0.252539	6	-1.18464	0.904555	6	0.623474	1.02437	6	1.20074	0.86608	6
>sp|P52844|ST1E1_RAT Estrogen sulfotransferase, isoform 1 OS	-1.17632	0.95902	6	4.2411	0.00371447	6	3.42	0.279992	6	-2.61377	0.1634	6
>sp|P52847|ST1B1_RAT Sulfotransferase family cytosolic 1B member 1 OS	1.31415	0.923874	4	0.942656	0.975642	4	-0.216207	0.999756	4	-0.923386	0.974415	4
>sp|P52873|PYC_RAT Pyruvate carboxylase, mitochondrial OS	-0.0338372	1.00459	34	1.19852	0.896031	34	1.50738	0.982399	34	1.00118	0.95611	34
>sp|P52925|HMGB2_RAT High mobility group protein B2 OS	1.07774	0.962784	2	-0.917445	0.979377	2	-1.21593	1.03184	2	0.817289	0.994011	2
>sp|P53534|PYGB_RAT Glycogen phosphorylase, brain form (Fragment) OS	-0.993659	0.979524	2	-0.775386	1.01336	2	0.457582	1.02178	2	1.07606	0.915613	2
>sp|P53767|VGFR1_RAT Vascular endothelial growth factor receptor 1 OS	1.32151	0.919972	1	1.26352	0.86173	1	-0.626435	1.02426	1	-1.34613	0.820095	1
>sp|P53987|MOT1_RAT Monocarboxylate transporter 1 OS	1.79224	0.719636	1	0.601726	1.0067	1	-0.845714	0.991841	1	-0.103863	1.00653	1
>sp|P54708|AT12A_RAT Potassium-transporting ATPase alpha chain 2 OS	0.446118	1.03753	1	-0.680048	1.00255	1	-0.397076	1.01268	1	1.13656	0.887373	1
>sp|P55006|RDH7_RAT Retinol dehydrogenase 7 OS				0.745312	1.00086	1
>sp|P55063|HS71L_RAT Heat shock 70 kDa protein 1-like OS	-1.81216	0.732383	3	-0.685944	1.00352	3	0.075021	0.991415	3	-0.923694	0.977273	3
>sp|P55159|PON1_RAT Serum paraoxonase/arylesterase 1 OS	-0.283536	1.01323	5	2.74952	0.177981	5	1.9326	0.722026	5	-1.86562	0.551047	5
>sp|P56198|CIDEC_MOUSE Cell death activator CIDE-3 OS	-41.2576	0	1	4.73526	0.000502951	1	-6.781e-05	1.00055	1	-6.781e-05	1.00055	1
>sp|P56391|CX6B1_MOUSE Cytochrome c oxidase subunit 6B1 OS	0.690636	1.01774	6	-0.146395	1.01001	6	-0.562232	1.01551	6	-0.344145	1.01256	6
>sp|P56522|ADRO_RAT NADPH:adrenodoxin oxidoreductase, mitochondrial OS	0.547572	1.01889	3	1.03553	0.957444	3	1.30022	1.01507	3	1.27114	0.86364	3
>sp|P56571|ES1_RAT ES1 protein homolog, mitochondrial OS	-1.73706	0.761177	1	-1.29295	0.859229	1	-0.380916	1.01017	1	-0.84624	0.980863	1
>sp|P56574|IDHP_RAT Isocitrate dehydrogenase [NADP], mitochondrial OS	0.850778	1.00485	9	1.32836	0.858592	9	0.961213	0.980393	9	0.342953	1.01121	9
>sp|P57093|PAHX_RAT Phytanoyl-CoA dioxygenase, peroxisomal OS	1.06098	0.962713	8	1.42411	0.842721	8	0.792851	0.989627	8	-0.260445	1.00179	8
>sp|P57113|MAAI_RAT Maleylacetoacetate isomerase OS	-1.0042	0.982065	5	-0.30706	1.01538	5	0.525059	1.00812	5	0.589766	1.01449	5
>sp|P59924|THOC1_RAT THO complex subunit 1 OS	0.152997	1.02243	1	0.159456	1.01069	1	0.322502	1.00725	1	0.439042	1.02373	1
>sp|P59999|ARPC4_MOUSE Actin-related protein 2/3 complex subunit 4 OS	0.484364	1.0317	4	-0.0807743	0.994582	4	-0.100853	0.989662	4	0.59926	1.01778	4
>sp|P60122|RUVB1_MOUSE RuvB-like 1 OS	-0.695756	1.01874	1	-2.12667	0.433003	1	-0.988994	0.986192	1	0.990356	0.961264	1
>sp|P60335|PCBP1_MOUSE Poly(rC)-binding protein 1 OS	0.251573	1.01181	3	0.00271267	1.00023	3	-1.04425	1.00605	3	-1.69176	0.637588	3
>sp|P60521|GBRL2_MOUSE Gamma-aminobutyric acid receptor-associated protein-like 2 OS	0.600403	1.02115	1	0.637225	1.00695	1	0.488766	1.0082	1	0.505219	1.02487	1
>sp|P60843|IF4A1_MOUSE Eukaryotic initiation factor 4A-I OS	0.749454	1.01245	1	0.233803	1.01512	1	-0.293507	1.00693	1	0.120711	1.00477	1
>sp|P60901|PSA6_RAT Proteasome subunit alpha type-6 OS	-0.502003	1.0286	1	0.719197	0.992786	1	0.337205	1.01156	1	-1.10935	0.902408	1
>sp|P61107|RAB14_RAT Ras-related protein Rab-14 OS	0.0673514	1.0059	1	0.650219	1.00934	1	1.04911	1.00897	1	0.683214	1.02296	1
>sp|P61459|PHS_RAT Pterin-4-alpha-carbinolamine dehydratase OS	0.554669	1.01901	4	0.279123	1.01232	4	0.317738	1.00462	4	0.747832	1.01962	4
>sp|P61620|S61A1_MOUSE Protein transport protein Sec61 subunit alpha isoform 1 OS	0.792097	1.01784	3	0.171383	1.01317	3	-0.338472	1.01282	3	-0.0970453	1.00838	3
>sp|P61804|DAD1_MOUSE Dolichyl-diphosphooligosaccharide--protein glycosyltransferase subunit DAD1 OS	0.317069	1.01842	1	0.293787	1.0151	1	-0.560239	1.0146	1	-1.06061	0.925281	1
>sp|P61979|HNRPK_MOUSE Heterogeneous nuclear ribonucleoprotein K OS	-0.833007	0.999412	3	-1.74567	0.714554	3	-1.36106	1.01476	3	-0.221575	1.00467	3
>sp|P61982|1433G_MOUSE 14-3-3 protein gamma OS	-0.0800743	1.00744	1	-0.132885	1.00232	1	-0.182835	1.0008	1	-0.187282	1.00783	1
>sp|P62075|TIM13_MOUSE Mitochondrial import inner membrane translocase subunit Tim13 OS	0.0444721	1.00398	1	0.217511	1.01725	1	0.776716	0.993146	1	0.982174	0.96263	1
>sp|P62082|RS7_MOUSE 40S ribosomal protein S7 OS	-0.385687	1.02511	3	0.0817714	0.997549	3	0.24306	1.0067	3	-0.248418	1.00569	3
>sp|P62138|PP1A_RAT Serine/threonine-protein phosphatase PP1-alpha catalytic subunit OS	0.138544	1.01992	2	-0.943642	0.97422	2	-1.07468	1.01183	2	-0.10583	1.00686	2
>sp|P62242|RS8_MOUSE 40S ribosomal protein S8 OS	0.854562	0.999507	1	0.134107	1.00461	1	-0.285684	1.0107	1	0.372245	1.00837	1
>sp|P62259|1433E_MOUSE 14-3-3 protein epsilon OS	-0.565342	1.02031	5	-0.0134284	0.998856	5	-0.579502	1.0158	5	-1.94767	0.509526	5
>sp|P62267|RS23_MOUSE 40S ribosomal protein S23 OS	1.33033	0.916493	1	0.0288221	0.994272	1	-0.555504	1.01044	1	0.880359	0.974567	1
>sp|P62274|RS29_MOUSE 40S ribosomal protein S29 OS	-1.54291	0.843141	2	-1.69934	0.727101	2	-0.374644	1.01185	2	0.436111	1.00228	2
>sp|P62301|RS13_MOUSE 40S ribosomal protein S13 OS	1.81593	0.740371	6	-0.109124	0.997308	6	-0.0404639	1.01644	6	1.88335	1.01597	6
>sp|P62315|SMD1_MOUSE Small nuclear ribonucleoprotein Sm D1 OS	0.784373	1.01257	1	-0.357107	1.01269	1	-0.782596	0.993609	1	0.351239	1.01208	1
>sp|P62317|SMD2_MOUSE Small nuclear ribonucleoprotein Sm D2 OS	0.62031	1.02428	3	-0.249643	1.01574	3	-1.06933	1.00932	3	-0.876778	0.971864	3
>sp|P62320|SMD3_MOUSE Small nuclear ribonucleoprotein Sm D3 OS	1.50292	0.851738	3	-0.580256	1.01089	3	-1.68492	0.879979	3	-0.69872	1.02366	3
>sp|P62331|ARF6_MOUSE ADP-ribosylation factor 6 OS	1.41265	0.890546	1	1.72124	0.725997	1	0.568669	1.01662	1	-0.0956737	1.00753	1
>sp|P62425|RL7A_RAT 60S ribosomal protein L7a OS	-0.61794	1.02018	8	-1.66479	0.73506	8	-1.11803	1.01069	8	0.246994	1.00475	8
>sp|P62702|RS4X_MOUSE 40S ribosomal protein S4, X isoform OS	0.211179	1.01726	7	-1.26202	0.859684	7	-0.662991	1.01218	7	1.29339	0.859735	7
>sp|P62754|RS6_MOUSE 40S ribosomal protein S6 OS	0.140436	1.02033	5	-1.743	0.718658	5	-1.16089	1.04304	5	1.22419	0.864357	5
>sp|P62806|H4_MOUSE Histone H4 OS	-0.288065	1.01865	12	-1.24737	0.870957	12	-0.0480739	1.04163	12	2.32966	1.02351	12
>sp|P62830|RL23_MOUSE 60S ribosomal protein L23 OS	0.883799	1.00198	3	-0.392266	1.01524	3	-0.693128	1.01258	3	0.493951	1.02547	3
>sp|P62858|RS28_MOUSE 40S ribosomal protein S28 OS	-1.02928	0.985737	1	-1.77887	0.686805	1	-0.733089	1.01026	1	0.419093	1.00683	1
>sp|P62889|RL30_MOUSE 60S ribosomal protein L30 OS	-0.445417	1.03833	3	-1.39677	0.850607	3	-1.00088	0.987082	3	0.0518257	1.00638	3
>sp|P62907|RL10A_RAT 60S ribosomal protein L10a OS	0.455004	1.03631	8	-0.346263	1.01052	1	-0.849881	0.995209	8	0.106249	1.00649	8
>sp|P62908|RS3_MOUSE 40S ribosomal protein S3 OS	-1.0478	0.969147	8	-1.57828	0.793423	8	-0.436725	1.02271	8	1.32779	0.835796	8
>sp|P62944|AP2B1_RAT AP-2 complex subunit beta OS	0.305731	1.01104	13				-0.8697	1.00182	13	-0.339698	1.01201	13
>sp|P62944-2|AP2B1_RAT Isoform 2 of AP-2 complex subunit beta OS				-0.776224	1.01644	13
>sp|P62962|PROF1_MOUSE Profilin-1 OS	1.49235	0.849593	2	1.07479	0.947228	2	0.965273	0.981493	2	1.79964	0.586906	2
>sp|P62996|TRA2B_MOUSE Transformer-2 protein homolog beta OS	1.01456	0.977637	2	0.189374	1.01878	2	0.177985	0.998072	2	1.28904	0.859386	2
>sp|P63028|TCTP_MOUSE Translationally-controlled tumor protein OS	-0.33949	1.01968	2	0.00924586	0.996801	2	0.0405141	0.997119	2	-0.0606683	1.00549	2
>sp|P63037|DNJA1_MOUSE DnaJ homolog subfamily A member 1 OS	-0.281342	1.01064	1	0.677741	0.999463	1	0.835045	0.982639	1	0.0615133	1.00478	1
>sp|P63038|CH60_MOUSE 60 kDa heat shock protein, mitochondrial OS	-0.38141	1.01537	6	0.975215	0.972062	6	1.04909	1.00265	6	-0.469212	1.02733	6
>sp|P63101|1433Z_MOUSE 14-3-3 protein zeta/delta OS	0.771562	1.01164	4	0.449931	1.01405	4	-0.397815	1.01462	4	-1.0515	0.927631	4
>sp|P63174|RL38_RAT 60S ribosomal protein L38 OS	0.910645	0.989349	2	-1.06619	0.954456	2	-0.993765	0.986492	2	0.992321	0.958401	2
>sp|P63242|IF5A1_MOUSE Eukaryotic translation initiation factor 5A-1 OS	15.3764	1.00428	4	-0.64577	1.01432	6	-1.02849	0.993656	4	-1.15232	0.881661	4
>sp|P67778|PHB_MOUSE Prohibitin OS	-0.401672	1.03439	2	-0.755944	1.01209	2	-0.422645	1.02299	2	0.049682	1.00623	2
>sp|P68040|GBLP_MOUSE Guanine nucleotide-binding protein subunit beta-2-like 1 OS	1.16436	0.957435	13	-0.842498	0.988415	13	-1.26842	1.01761	13	-0.161082	1.00225	13
>sp|P68181-4|KAPCB_MOUSE Isoform 4 of cAMP-dependent protein kinase catalytic subunit beta OS	-0.442882	1.03529	1	-0.459751	1.0125	1	-0.256385	1.00541	1	-0.209435	1.00415	1
>sp|P68368|TBA4A_MOUSE Tubulin alpha-4A chain OS	-0.405455	1.03491	3	-0.225481	1.01711	3	0.252394	1.00618	3	0.0624665	1.00594	3
>sp|P69060|NEUA_RAT N-acylneuraminate cytidylyltransferase OS	-0.414961	1.03861	7	-1.70713	0.736796	7	-1.48905	0.981889	7	-0.297939	1.0045	7
>sp|P70473|AMACR_RAT Alpha-methylacyl-CoA racemase OS	0.0846229	1.01012	5	3.44001	0.0485715	5	3.70963	0.017763	5	1.1492	0.880445	5
>sp|P70552|GFRP_RAT GTP cyclohydrolase 1 feedback regulatory protein OS	0.58392	1.02102	3	-1.40507	0.845564	3	-1.1228	1.01731	3	1.24382	0.869251	3
>sp|P70580|PGRC1_RAT Membrane-associated progesterone receptor component 1 OS	-1.11292	0.947283	6	-0.642261	1.00762	6	0.195525	0.999957	6	0.634325	1.01789	6
>sp|P70581|NUPL1_RAT Nucleoporin p58/p45 OS	1.42715	0.87568	1	0.734737	0.9979	1	0.229403	1.00375	1	0.929057	0.979562	1
>sp|P70584|ACDSB_RAT Short/branched chain specific acyl-CoA dehydrogenase, mitochondrial OS	-0.308635	1.01054	5	0.941982	0.976616	5	0.137804	0.998471	5	-2.30885	0.306536	5
>sp|P70619|GSHR_RAT Glutathione reductase (Fragment) OS	0.590634	1.02409	1	0.622527	1.00576	1	0.220756	1.00292	1	0.0792064	1.00961	1
>sp|P70670|NACAM_MOUSE Nascent polypeptide-associated complex subunit alpha, muscle-specific form OS	-0.0996318	1.01246	3	-0.745251	1.00095	3	-1.1131	1.01164	3	-1.42693	0.789379	3
>sp|P80067|CATC_RAT Dipeptidyl peptidase 1 OS	1.26097	0.93435	1	1.00876	0.959369	1	1.00267	0.990074	1	1.57524	0.714069	1
>sp|P80254|DOPD_RAT D-dopachrome decarboxylase OS	0.0630714	1.005	5	-0.0621658	0.995746	5	0.566685	1.01679	5	1.35934	0.826422	5
>sp|P80432|COX7C_RAT Cytochrome c oxidase subunit 7C, mitochondrial OS	0.862607	1.00838	2	0.652075	1.01055	2	0.180535	0.997885	2	0.0775792	1.00966	2
>sp|P81155|VDAC2_RAT Voltage-dependent anion-selective channel protein 2 OS	1.44276	0.874444	8	0.0103388	0.998327	8	-1.27991	1.01285	8	-1.62024	0.675155	8
>sp|P81795|IF2G_RAT Eukaryotic translation initiation factor 2 subunit 3 OS	-0.231886	1.01556	6	0.0590797	0.996446	6	0.124021	0.999667	6	-0.376097	1.00694	6
>sp|P82995|HS90A_RAT Heat shock protein HSP 90-alpha OS	-0.969933	0.986103	9	-0.0917724	0.99735	9	0.396543	1.01325	9	0.00561276	0.999831	9
>sp|P84078|ARF1_MOUSE ADP-ribosylation factor 1 OS	-0.360994	1.0169	3	0.576939	1.0084	3	1.67728	0.994955	3	1.55206	0.666169	3
>sp|P84091|AP2M1_MOUSE AP-2 complex subunit mu OS	0.0838319	1.00882	4	-0.234192	1.01626	4	-0.735249	1.0101	4	-1.08357	0.915731	4
>sp|P84099|RL19_MOUSE 60S ribosomal protein L19 OS	1.9234	0.652368	2	-0.569429	1.00992	2	-1.76724	0.809719	2	-0.518486	1.02947	2
>sp|P84104|SRSF3_MOUSE Serine/arginine-rich splicing factor 3 OS	-0.130283	1.01824	2	-0.205248	1.01926	2	1.70715	0.999998	2	3.55465	0.0149588	2
>sp|P84586|HNRGL_RAT Heterogeneous nuclear ribonucleoprotein G retrogene-like OS	-2.36337	0.421872	4	-2.35489	0.294688	2	-0.850647	0.994138	4	-0.204368	1.00518	4
>sp|P85094|ISC2A_MOUSE Isochorismatase domain-containing protein 2A, mitochondrial OS	-0.773986	1.01115	1	-0.15521	1.00828	1	0.552006	1.01462	1	0.164525	1.00339	1
>sp|P85118|CMLO2_RAT Probable N-acetyltransferase CML2 OS	1.41091	0.893441	1	0.0767024	0.993597	1	-1.03356	0.995896	1	-0.0149309	1.00416	1
>sp|P85834|EFTU_RAT Elongation factor Tu, mitochondrial OS	-0.929476	0.983593	14	-0.647286	1.00715	14	-0.0841878	0.99339	14	0.127559	1.00771	14
>sp|P85968|6PGD_RAT 6-phosphogluconate dehydrogenase, decarboxylating OS	1.22339	0.945304	4	1.24926	0.868116	4	1.35053	1.0125	4	2.11089	0.415332	4
>sp|P85972|VINC_RAT Vinculin OS	0.190345	1.02579	13	0.99076	0.966564	13	0.397048	1.01271	13	-0.891388	0.971586	13
>sp|P85973|PNPH_RAT Purine nucleoside phosphorylase OS	-0.234677	1.01287	3	1.86254	0.621547	3	1.64109	0.925798	3	-0.447938	1.02451	3
>sp|P86252|PURA_RAT Transcriptional activator protein Pur-alpha (Fragments) OS	0.276104	1.01031	1	-0.0957506	0.998453	1	-0.598542	1.01184	1	-0.49332	1.0262	1
>sp|P97519|HMGCL_RAT Hydroxymethylglutaryl-CoA lyase, mitochondrial OS	0.291787	1.0154	2	1.44343	0.848667	2	1.53861	0.963917	2	0.519965	1.02772	2
>sp|P97521|MCAT_RAT Mitochondrial carnitine/acylcarnitine carrier protein OS	1.2574	0.932541	7	1.09445	0.936828	7	-0.203377	1.00217	7	-1.75136	0.6034	7
>sp|P97524|S27A2_RAT Very long-chain acyl-CoA synthetase OS	0.93658	0.984989	18	-0.268425	1.0151	18	-1.15021	1.03987	18	-1.47688	0.771719	18
>sp|P97532|THTM_RAT 3-mercaptopyruvate sulfurtransferase OS	1.14408	0.940956	2	1.5506	0.795535	2	0.930286	0.982357	2	0.485668	1.0196	2
>sp|P97536|CAND1_RAT Cullin-associated NEDD8-dissociated protein 1 OS	0.878035	0.995871	2	0.452949	1.01351	2	-0.320124	1.00468	2	-0.426925	1.0132	2
>sp|P97562|ACOX2_RAT Peroxisomal acyl-coenzyme A oxidase 2 OS	-1.14084	0.935435	15	-1.2616	0.856046	15	-1.14607	1.03376	15	-1.42965	0.785358	15
>sp|P97564|GPAT1_RAT Glycerol-3-phosphate acyltransferase 1, mitochondrial OS	1.57771	0.82435	2	-0.0606118	0.997043	2	-0.407392	1.01621	2	1.28168	0.859061	2
>sp|P97584|PTGR1_RAT Prostaglandin reductase 1 OS	0.847704	1.00456	1	1.30363	0.865883	1	0.260783	1.00581	1	-0.527281	1.03314	1
>sp|P97603|NEO1_RAT Neogenin (Fragment) OS	0.525374	1.02405	1	0.181254	1.01548	1	0.116277	0.993593	1	0.551086	1.02549	1
>sp|P97612|FAAH1_RAT Fatty-acid amide hydrolase 1 OS	1.17519	0.96084	1	0.564304	1.00754	1	0.385723	1.0104	1	1.25976	0.862906	1
>sp|P97633|KC1A_RAT Casein kinase I isoform alpha OS	0.0456637	1.00426	1	0.0376756	0.994969	1	1.077	1.01257	1	1.74858	0.60702	1
>sp|P97700|M2OM_RAT Mitochondrial 2-oxoglutarate/malate carrier protein OS	1.22906	0.945967	5	0.772945	1.01249	5	-0.323005	1.0084	5	-1.00264	0.953972	5
>sp|P97772-3|GRM1_MOUSE Isoform 3 of Metabotropic glutamate receptor 1 OS	-0.309887	1.0109	1	0.568568	1.01096	1	1.54245	0.970574	1	1.14633	0.878911	1
>sp|P97807|FUMH_MOUSE Fumarate hydratase, mitochondrial OS	1.19294	0.963002	1	0.842994	0.990663	1	0.51749	1.00761	1	0.963557	0.967096	1
>sp|P97830|UNC4_RAT Homeobox protein unc-4 homolog OS	0.495999	1.0315	1	0.348451	1.01328	1	0.665679	1.00875	1	1.11939	0.895327	1
>sp|P97837|DLGP2_RAT Disks large-associated protein 2 OS	-0.345783	1.01909	1	-0.0371932	0.994143	1	4.48729	0.00167561	1	7.1586	1.89058e-10	1
>sp|P97852|DHB4_RAT Peroxisomal multifunctional enzyme type 2 OS	-1.55422	0.845524	31	-1.31374	0.864437	31	-0.150913	1.00155	31	1.48929	0.766541	31
>sp|P97872|FMO5_MOUSE Dimethylaniline monooxygenase [N-oxide-forming] 5 OS	0.803702	1.00762	1	0.038538	0.995487	1	-0.172485	0.998811	1	0.658464	1.01797	1
>sp|P97885|CXCL5_RAT C-X-C motif chemokine 5 OS	0.289825	1.01253	1	7.04164	3.17269e-09	1	4.48341	0.00119444	1	-3.41189	0.0255537	1
>sp|P99024|TBB5_MOUSE Tubulin beta-5 chain OS	0.00973602	1.00438	1	0.417149	1.01425	1	0.22993	1.00325	1	-0.318945	1.01131	1
>sp|Q00438|PTBP1_RAT Polypyrimidine tract-binding protein 1 OS	-0.676953	1.02284	8	-0.951429	0.979579	8	-0.741139	1.01043	8	-0.698364	1.02015	8
>sp|Q00566|MECP2_RAT Methyl-CpG-binding protein 2 OS	0.387373	1.02601	1	0.0660716	0.996866	1	-0.30915	1.00508	1	-0.153486	1.00204	1
>sp|Q00715|H2B1_RAT Histone H2B type 1 OS	-1.09922	0.945993	4	-2.06304	0.47673	4	-1.07056	1.01399	4	0.844271	0.979111	4
>sp|Q00729|H2B1A_RAT Histone H2B type 1-A OS	0.643505	1.01885	7	-1.09947	0.940896	7	-1.49813	0.986628	7	-0.246867	1.00333	7
>sp|Q00961|NMDE3_RAT Glutamate [NMDA] receptor subunit epsilon-3 OS	0.489955	1.02928	1	0.881682	0.984671	1	0.188999	0.999459	1	-0.550381	1.02634	1
>sp|Q01177|PLMN_RAT Plasminogen OS	-0.459579	1.03607	6	-0.0097409	0.997604	6	-1.85201	0.733121	6	-5.05377	5.41127e-05	6
>sp|Q01205|ODO2_RAT Dihydrolipoyllysine-residue succinyltransferase component of 2-oxoglutarate dehydrogenase complex, mitochondrial OS	0.0881371	1.0104	3	-1.07876	0.946989	3	-0.713294	1.01234	3	0.818611	0.992197	3
>sp|Q01405|SC23A_MOUSE Protein transport protein Sec23A OS	-0.202518	1.0195	3	0.392115	1.0154	3	0.453174	1.01691	3	-0.0657353	1.0091	3
>sp|Q02253|MMSA_RAT Methylmalonate-semialdehyde dehydrogenase [acylating], mitochondrial OS	-0.414425	1.03729	18	1.26285	0.858445	18	1.25815	1.02966	18	-0.393997	1.0048	18
>sp|Q02769|FDFT_RAT Squalene synthase OS	-1.11014	0.945426	1	-1.67201	0.744582	1	0.0413065	0.998366	1	1.29059	0.857036	1
>sp|Q02874|H2AY_RAT Core histone macro-H2A.1 OS	-0.0625094	1.00548	6	-1.69715	0.723402	6	-1.20281	1.03168	6	0.995835	0.95858	6
>sp|Q02974|KHK_RAT Ketohexokinase OS	-0.511741	1.02861	3	-0.116189	0.995749	3	0.886167	0.997724	3	1.76718	0.599855	3
>sp|Q03248|BUP1_RAT Beta-ureidopropionase OS	0.585349	1.02265	4	0.546407	1.0068	4	0.775876	0.994272	4	1.6724	0.647174	4
>sp|Q03265|ATPA_MOUSE ATP synthase subunit alpha, mitochondrial OS	0.934388	0.983143	1	0.377632	1.01335	1	0.189854	1.00084	1	0.883672	0.973039	1
>sp|Q03336|RGN_RAT Regucalcin OS	0.919782	0.987669	12	3.28225	0.0636955	12	3.32944	0.054422	12	1.65894	0.657231	12
>sp|Q03626|MUG1_RAT Murinoglobulin-1 OS	0.66692	1.01951	2	0.550198	1.00543	2	-0.310956	1.00572	2	-0.897493	0.972441	2
>sp|Q04931|SSRP1_RAT FACT complex subunit SSRP1 OS	1.23589	0.942342	1	-0.222054	1.01664	1	-0.770196	0.997724	1	0.635236	1.01674	1
>sp|Q05096|MYO1B_RAT Myosin-Ib OS	0.588031	1.02161	3	0.389685	1.01448	3	-0.125154	0.998672	3	-0.437529	1.0225	3
>sp|Q05343|RXRA_RAT Retinoic acid receptor RXR-alpha OS	-0.383696	1.02094	1	0.384515	1.01739	1	0.468498	1.01534	1	-0.39115	1.00248	1
>sp|Q05962|ADT1_RAT ADP/ATP translocase 1 OS	-0.303071	1.00887	9	1.01773	0.955008	9	0.614162	1.01929	9	-1.37537	0.81935	9
>sp|Q05982|NDKA_RAT Nucleoside diphosphate kinase A OS	-0.575639	1.01995	5	-0.859965	0.990837	5	0.0658775	0.992651	5	1.32409	0.84136	5
>sp|Q06647|ATPO_RAT ATP synthase subunit O, mitochondrial OS	0.557412	1.01787	9	0.148851	1.00918	9	0.364835	1.00865	9	0.167461	1.00358	9
>sp|Q07066|PXMP2_RAT Peroxisomal membrane protein 2 OS	1.56968	0.83048	2	-0.396395	1.01612	2	-2.07995	0.598269	2	-1.28634	0.856598	2
>sp|Q07071|GCKR_RAT Glucokinase regulatory protein OS	0.0322983	1.00398	2	0.750734	1.00425	2	1.12056	1.01374	2	0.665239	1.01555	2
>sp|Q07116|SUOX_RAT Sulfite oxidase, mitochondrial OS	-0.809491	1.00839	2	0.242127	1.01694	2	0.233295	1.00459	2	-1.19796	0.858195	2
>sp|Q07205|IF5_RAT Eukaryotic translation initiation factor 5 OS	-0.206838	1.01764	1	0.558727	1.00891	1	0.311171	1.00797	1	-0.731218	1.01971	1
>sp|Q07936|ANXA2_RAT Annexin A2 OS	0.591986	1.02242	7	0.49119	1.01353	7	0.0578427	0.99423	7	-0.253451	1.00314	7
>sp|Q07984|SSRD_RAT Translocon-associated protein subunit delta OS	0.613842	1.01947	2	0.141045	1.00863	2	-0.616982	1.02171	2	-0.697279	1.02158	2
>sp|Q09073|ADT2_RAT ADP/ATP translocase 2 OS	0.384148	1.02225	11	0.773519	1.01171	11	0.0211598	0.999094	11	-1.84622	0.566311	11
>sp|Q09167-2|SRSF5_RAT Isoform 2 of Serine/arginine-rich splicing factor 5 OS	-0.0232138	1.00643	1	-0.446275	1.01344	1	-0.385779	1.01304	1	0.0746717	1.00814	1
>sp|Q0D2L3|SPEB_RAT Agmatinase, mitochondrial OS	0.354331	1.01787	3	0.159633	1.01263	3	-0.673479	1.01124	3	-1.52888	0.74312	3
>sp|Q0P557|MIEAP_MOUSE Mitochondria-eating protein OS	1.29478	0.928691	1	0.559566	1.00791	1	-1.2255	1.03869	1	-1.29751	0.860481	1
>sp|Q0VGK3|GLCTK_RAT Glycerate kinase OS	0.350089	1.01715	1	0.182126	1.01612	1	0.22496	1.00344	1	0.524315	1.0334	1
>sp|Q10758|K2C8_RAT Keratin, type II cytoskeletal 8 OS	-2.45988	0.366429	35	-0.938511	0.970166	35	0.920374	0.981753	35	2.12207	0.822698	35
>sp|Q1HCL7|NAKD1_RAT NAD kinase domain-containing protein 1 OS	1.79797	0.741538	2	2.37908	0.286972	2	1.40338	0.996101	2	0.43826	1.02168	2
>sp|Q1JU68|EIF3A_RAT Eukaryotic translation initiation factor 3 subunit A OS	-0.746753	1.00658	3	-0.379989	1.01345	3	1.89074	1.00945	3	3.16865	0.0438316	3
>sp|Q27W01|RBM8A_RAT RNA-binding protein 8A OS	2.00244	0.628758	2	0.0659659	0.995699	2	-1.19014	1.02829	2	0.063476	1.00509	2
>sp|Q2TA68|OPA1_RAT Dynamin-like 120 kDa protein, mitochondrial OS	0.746053	1.00751	2	1.03568	0.957221	2	0.0931684	0.99033	2	-0.840973	0.979201	2
>sp|Q3B7D0|HEM6_RAT Coproporphyrinogen-III oxidase, mitochondrial OS	-0.252616	1.01311	1	0.861809	0.992788	1	1.76758	0.825105	1	1.10197	0.90755	1
>sp|Q3B8Q1|DDX21_RAT Nucleolar RNA helicase 2 OS	-0.220788	1.01788	2	-0.690147	1.00673	2	-0.666604	1.01129	2	-0.430431	1.01216	2
>sp|Q3B8Q2|IF4A3_RAT Eukaryotic initiation factor 4A-III OS	0.938103	0.987835	5	0.296535	1.01554	5	-0.186645	0.999461	5	0.079532	1.00933	5
>sp|Q3KR86|IMMT_RAT Mitochondrial inner membrane protein (Fragment) OS	1.81305	0.730946	4	1.86436	0.626457	4	0.185003	0.99881	4	-1.21963	0.864858	4
>sp|Q3KRE0|ATAD3_RAT ATPase family AAA domain-containing protein 3 OS	1.17372	0.956254	1	1.542	0.799733	1	-0.903629	0.989082	1	-2.67654	0.14732	1
>sp|Q3MIB4|LONP2_RAT Lon protease homolog 2, peroxisomal OS	0.110271	1.01396	8	2.024	0.50535	8	1.16086	1.04309	8	-1.87253	0.551561	8
>sp|Q3MIE0|ECHD3_RAT Enoyl-CoA hydratase domain-containing protein 3, mitochondrial OS	-1.99798	0.635448	10	-0.305579	1.01526	10	0.364047	1.00773	10	-1.24971	0.86698	10
>sp|Q3MIF4|XYLB_RAT Xylulose kinase OS	1.36623	0.891118	2	-0.125287	1.00233	2	-0.633982	1.02446	2	1.02893	0.933536	2
>sp|Q3SWU3|HNRDL_RAT Heterogeneous nuclear ribonucleoprotein D-like OS	-2.79015	0.223432	1	-3.42966	0.0438796	1	-0.735206	1.01016	1	0.863073	0.977163	1
>sp|Q3TES0|IQEC3_MOUSE IQ motif and SEC7 domain-containing protein 3 OS	-0.402517	1.03628	1	1.90305	0.584337	1	2.17263	0.54459	1	-0.23697	1.00441	1
>sp|Q3THW5|H2AV_MOUSE Histone H2A.V OS	-1.43139	0.868742	3	-0.989486	0.964964	3	0.964336	1.0099	3	2.16673	1.02398	3
>sp|Q3TQB2|FXRD1_MOUSE FAD-dependent oxidoreductase domain-containing protein 1 OS	-0.648194	1.02015	1	-0.401587	1.01676	1	2.24225	0.513424	1	3.54646	0.0181164	1
>sp|Q3UEB3|PUF60_MOUSE Poly(U)-binding-splicing factor PUF60 OS	1.68185	0.777444	1	1.71902	0.729432	1	-0.520495	1.00721	1	-1.36119	0.823646	1
>sp|Q3UHD9|AGAP2_MOUSE Arf-GAP with GTPase, ANK repeat and PH domain-containing protein 2 OS	-0.613846	1.01946	1	-0.128129	1.0025	1	-0.48085	1.01223	1	-1.29702	0.861219	1
>sp|Q3UHU5|CC165_MOUSE Coiled-coil domain-containing protein 165 OS	-0.761966	1.00657	1	-0.586866	1.01051	1	1.14416	1.03702	1	1.86555	0.551134	1
>sp|Q3UQ44|IQGA2_MOUSE Ras GTPase-activating-like protein IQGAP2 OS	-0.395948	1.03136	3	0.0124635	0.998426	3	0.386553	1.01221	3	0.226396	1.00462	3
>sp|Q3UV17|K22O_MOUSE Keratin, type II cytoskeletal 2 oral OS				-2.7638	0.180021	1
>sp|Q3UX83|1A1L2_MOUSE 1-aminocyclopropane-1-carboxylate synthase-like protein 2 OS	1.51182	0.86047	1	-0.253074	1.01624	1	-1.99283	0.660098	1	-0.878638	0.973879	1
>sp|Q3V0K9|PLSI_MOUSE Plastin-1 OS	-0.00441289	1.00254	1	0.502419	1.01149	1	0.80039	0.99363	1	0.430712	1.01185	1
>sp|Q3V1G4|OLM2B_MOUSE Olfactomedin-like protein 2B OS	-0.378321	1.01513	1	0.818224	0.995804	1	0.851014	0.99826	1	-0.475999	1.02564	1
>sp|Q460M5|LRFN2_RAT Leucine-rich repeat and fibronectin type-III domain-containing protein 2 OS	0.966044	0.9813	1	0.0372145	0.994125	1	-1.48525	0.980434	1	-1.29567	0.863289	1
>sp|Q496Z2|TRIL_RAT TLR4 interactor with leucine rich repeats OS	0.693912	1.0173	1	0.699842	0.99793	1	0.653192	1.01355	1	0.821852	0.992163	1
>sp|Q497B0|NIT2_RAT Omega-amidase NIT2 OS	-0.0159717	1.00549	9	0.950503	0.977568	9	1.43491	0.972467	9	1.35171	0.823514	9
>sp|Q498D5|RMD2_RAT Regulator of microtubule dynamics protein 2 OS	0.0214065	1.00666	3	0.609541	1.00714	3	1.2053	1.03595	3	1.23883	0.861634	3
>sp|Q498U4|SARNP_RAT SAP domain-containing ribonucleoprotein OS	1.1571	0.955425	1	1.20217	0.894687	1	0.362367	1.00428	1	0.0951199	1.00801	1
>sp|Q4AEF8|COPG_RAT Coatomer subunit gamma OS	0.581666	1.02378	1	0.400782	1.01764	1	-0.576994	1.01547	1	-0.904219	0.972483	1
>sp|Q4FZT0|STML2_RAT Stomatin-like protein 2 OS	-0.552367	1.01961	4	0.5512	1.00424	4	0.69955	1.01853	4	-0.0733667	1.00726	4
>sp|Q4FZT8|SPRY4_RAT SPRY domain-containing protein 4 OS	-0.31919	1.01874	2	0.76823	1.00919	2	0.674913	1.01317	2	-1.24088	0.862852	2
>sp|Q4FZU2|K2C6A_RAT Keratin, type II cytoskeletal 6A OS	-1.76501	0.75022	1	-2.1709	0.413203	1	-0.463663	1.01857	1	0.557327	1.01625	1
>sp|Q4FZV0|MANBA_RAT Beta-mannosidase OS	0.579394	1.01983	1	0.0376378	0.99378	1	-0.155343	1.00019	1	0.424648	1.00726	1
>sp|Q4FZX7|SRPRB_RAT Signal recognition particle receptor subunit beta OS	1.47218	0.860402	2	0.737236	0.998487	2	-0.540469	1.00896	2	-0.844892	0.98272	2
>sp|Q4G061|EIF3B_RAT Eukaryotic translation initiation factor 3 subunit B OS	0.64828	1.02004	1	-0.0397572	0.996327	1	-0.808853	0.986439	1	-0.453263	1.02642	1
>sp|Q4KLH4|PSPC1_RAT Paraspeckle component 1 OS	0.985544	0.980778	2	-0.64862	1.00782	2	-0.857795	1.0028	2	0.66025	1.01568	2
>sp|Q4KLL4|TM9S4_RAT Transmembrane 9 superfamily member 4 OS	-1.25784	0.931822	1	0.226412	1.01848	1	0.282948	1.00858	1	-1.13225	0.887958	1
>sp|Q4KLP0|DHTK1_RAT Probable 2-oxoglutarate dehydrogenase E1 component DHKTD1, mitochondrial OS	-0.8419	0.997499	6	1.29206	0.860577	6	2.18399	0.55404	6	1.17443	0.874719	6
>sp|Q4KLZ6|DHAK_RAT Bifunctional ATP-dependent dihydroxyacetone kinase/FAD-AMP lyase (cyclizing) OS	-0.680477	1.0259	7	-0.866513	0.990734	7	0.415987	1.01895	7	2.08783	0.430106	7
>sp|Q4KM73|KCY_RAT UMP-CMP kinase OS	0.380068	1.01327	1	0.537021	1.01271	1	0.876252	1.00215	1	1.04566	0.930703	1
>sp|Q4LDG0|S27A5_MOUSE Bile acyl-CoA synthetase OS	0.89307	0.996741	1	1.93915	0.558254	1	0.679331	1.01127	1	-0.989089	0.963114	1
>sp|Q4QQV3|F162A_RAT Protein FAM162A OS	1.49208	0.840497	1	0.905299	0.982386	1	-0.897175	0.993406	1	-1.06537	0.922002	1
>sp|Q4V898|HNRPG_RAT Heterogeneous nuclear ribonucleoprotein G OS				-1.72535	0.72709	2
>sp|Q4V8F9|HSDL2_RAT Hydroxysteroid dehydrogenase-like protein 2 OS	0.448703	1.04055	1	0.251873	1.01587	1	-0.0604071	0.995291	1	0.0450595	1.00619	1
>sp|Q4V8K1|STEA4_RAT Metalloreductase STEAP4 OS	1.147	0.949275	2	-0.284022	1.01216	2	-0.432958	1.02402	2	0.880341	0.974591	2
>sp|Q501J6|DDX17_MOUSE Probable ATP-dependent RNA helicase DDX17 OS	-0.745794	1.00786	1	-0.680912	1.00145	1	-0.102342	0.9897	1	-0.0455072	1.00582	1
>sp|Q505J6|GHC2_RAT Mitochondrial glutamate carrier 2 OS	0.57885	1.01826	2	1.16793	0.897206	2	0.793717	0.98846	2	-0.0590031	1.00493	2
>sp|Q505J8|SYFA_RAT Phenylalanyl-tRNA synthetase alpha chain OS	-1.69413	0.757642	1	-0.585393	1.00793	1	0.742445	1.00869	1	0.475349	1.02639	1
>sp|Q561S0|NDUAA_RAT NADH dehydrogenase [ubiquinone] 1 alpha subcomplex subunit 10, mitochondrial OS	0.251328	1.01205	8	0.279335	1.01447	8	0.020491	0.999636	8	-0.23531	1.006	8
>sp|Q562C4|MET7B_RAT Methyltransferase-like protein 7B OS	-0.143751	1.023	2	1.53404	0.79994	2	1.34897	1.00475	2	-0.443413	1.02765	2
>sp|Q58FK9|KAT3_RAT Kynurenine--oxoglutarate transaminase 3 OS	0.826674	0.999304	5	1.64872	0.746274	5	1.14016	1.02826	5	-0.231283	1.0068	5
>sp|Q5BJN5|MIA40_RAT Mitochondrial intermembrane space import and assembly protein 40 OS	0.86196	1.00457	1	0.723541	0.995947	1	0.338955	1.01231	1	0.487366	1.02276	1
>sp|Q5BJQ0|ADCK3_RAT Chaperone activity of bc1 complex-like, mitochondrial OS	-0.537514	1.02022	4	-0.780647	1.01462	4	0.211439	0.999791	4	1.29527	0.856883	4
>sp|Q5BJS7|CPNE9_RAT Copine-9 OS	-0.821082	1.00263	1	-1.30313	0.866648	1	-1.18887	1.0305	1	-0.9289	0.974789	1
>sp|Q5BJY9|K1C18_RAT Keratin, type I cytoskeletal 18 OS	-2.03693	0.626366	31	-0.727961	0.997803	31	0.896731	0.978838	31	2.11811	0.813214	31
>sp|Q5BK17|IYD1_RAT Iodotyrosine dehalogenase 1 OS	0.154636	1.02237	1	-2.40503	0.284272	1	-2.60709	0.260492	1	-0.0748002	1.00803	1
>sp|Q5BK63|NDUA9_RAT NADH dehydrogenase [ubiquinone] 1 alpha subcomplex subunit 9, mitochondrial OS	1.14854	0.951223	11	1.02144	0.954876	11	0.347473	1.00861	11	-0.354698	1.01282	11
>sp|Q5BK71|ARL11_RAT ADP-ribosylation factor-like protein 11 OS	0.234406	1.01313	1	0.612511	1.00572	1	0.321981	1.00528	1	-0.226491	1.00681	1
>sp|Q5EAN7|TE2IP_RAT Telomeric repeat-binding factor 2-interacting protein 1 OS	0.640479	1.0227	1	1.18313	0.900655	1	0.597611	1.01069	1	-0.18991	1.00759	1
>sp|Q5FVM4|NONO_RAT Non-POU domain-containing octamer-binding protein OS	0.969303	0.981749	5	-1.29384	0.864694	5	-1.20112	1.02609	5	1.50813	0.752074	5
>sp|Q5FVN1|STBD1_RAT Starch-binding domain-containing protein 1 OS	-0.141297	1.02168	1	-0.540212	1.00894	1	-0.588461	1.01279	1	-0.276635	1.00242	1
>sp|Q5FVQ4|MLEC_RAT Malectin OS	1.22554	0.946738	5	2.39567	0.282709	5	1.39547	0.999364	5	-0.718005	1.02367	5
>sp|Q5FVR5|ACNT2_RAT Acyl-coenzyme A amino acid N-acyltransferase 2 OS	1.98917	0.632897	5	1.98374	0.526441	5	-3.61701	0.0255048	5	-10.4981	0	5
>sp|Q5FWT1|FA98A_RAT Protein FAM98A OS	-0.622021	1.0245	2	0.542101	1.00878	2	0.876217	1.00221	2	-0.0654284	1.00738	2
>sp|Q5I012|S38AA_MOUSE Putative sodium-coupled neutral amino acid transporter 10 OS	0.120922	1.01549	1	0.170937	1.01145	1	-0.222989	1.00306	1	-0.527573	1.03279	1
>sp|Q5I0C3|MCCA_RAT Methylcrotonoyl-CoA carboxylase subunit alpha, mitochondrial OS	0.188625	1.02294	3	0.285488	1.01307	3	0.442088	1.02352	3	0.200025	1.00554	3
>sp|Q5I0H9|PDIA5_RAT Protein disulfide-isomerase A5 OS	-2.09597	0.585141	22	0.163778	1.01439	22	1.17293	1.03048	22	0.156894	1.0049	22
>sp|Q5I0J9|ASPD_RAT Putative L-aspartate dehydrogenase OS	0.322569	1.02622	3	0.284999	1.01356	3	0.24072	1.00511	3	0.310874	1.00621	3
>sp|Q5M7U6|ARP2_RAT Actin-related protein 2 OS	0.512079	1.02821	2	-1.00235	0.965285	2	-0.815711	0.98863	2	1.19671	0.854145	2
>sp|Q5M7V8|TR150_RAT Thyroid hormone receptor-associated protein 3 OS	1.12766	0.945267	4	-0.388169	1.01611	4	-0.896677	0.990845	4	0.504181	1.02293	4
>sp|Q5M7W5|MAP4_RAT Microtubule-associated protein 4 OS	0.655941	1.02125	1	-0.0807741	0.994582	1	-1.13009	1.01995	1	-0.906925	0.968676	1
>sp|Q5M828|ADTRP_RAT Androgen-dependent TPF1-regulating protein OS	0.811183	1.00605	1	-0.797028	1.01063	1	-1.37113	1.0035	1	0.156501	1.00143	1
>sp|Q5M844|SYNE4_RAT Nesprin-4 OS	-0.176824	1.02439	1	1.08742	0.937813	1	1.3115	1.01459	1	0.0714582	1.00623	1
>sp|Q5M875|DHB13_RAT 17-beta-hydroxysteroid dehydrogenase 13 OS	0.694732	1.02008	8	-2.62255	0.211231	8	-2.96684	0.1687	8	0.705309	1.01896	8
>sp|Q5M9G3|CAPR1_RAT Caprin-1 OS	1.536	0.840761	2	-0.258817	1.01446	2	-0.984733	0.981508	2	0.576842	1.01892	2
>sp|Q5M9I5|QCR6_RAT Cytochrome b-c1 complex subunit 6, mitochondrial OS	0.263571	1.01483	1	-0.246957	1.01837	1	1.8862	0.724592	1	3.802	0.00803793	1
>sp|Q5PPL3|NSDHL_RAT Sterol-4-alpha-carboxylate 3-dehydrogenase, decarboxylating OS	0.0768081	1.00827	4	1.32028	0.859107	4	0.90314	0.989784	4	-0.802841	0.999177	4
>sp|Q5PQT3|GLYAT_RAT Glycine N-acyltransferase OS	-0.673764	1.02319	13	-0.0853302	0.997078	13	0.61459	1.01876	13	1.03276	0.933303	13
>sp|Q5PQX1|TOIP1_RAT Torsin-1A-interacting protein 1 OS	0.00118414	1.0033	1	0.0856755	0.998703	1	0.501355	1.00382	1	0.560545	1.0241	1
>sp|Q5RJR8|LRC59_RAT Leucine-rich repeat-containing protein 59 OS	-1.92641	0.662258	8	0.0889003	0.997877	8	0.143533	1.00029	8	-2.17055	0.383181	8
>sp|Q5RK30|SBDS_RAT Ribosome maturation protein SBDS OS	-0.28249	1.01188	1	-0.505433	1.01	1	0.115795	0.994011	1	0.664165	1.01442	1
>sp|Q5RKH0|GLYR1_RAT Putative oxidoreductase GLYR1 OS	1.17509	0.961001	1	-0.203905	1.02053	1	-1.22877	1.04196	1	-0.386282	1.00499	1
>sp|Q5RKH1|PRP4B_RAT Serine/threonine-protein kinase PRP4 homolog OS	-0.908892	0.986986	1	-0.961497	0.980147	1	-0.39836	1.01403	1	-0.243412	1.00282	1
>sp|Q5RKI0|WDR1_RAT WD repeat-containing protein 1 OS	-0.0897164	1.01237	1	-0.0294243	0.996821	1	0.395123	1.01024	1	0.560754	1.02609	1
>sp|Q5SGE0|LPPRC_RAT Leucine-rich PPR motif-containing protein, mitochondrial OS	0.725944	1.01291	2	-0.224201	1.01608	2	-0.690346	1.01361	2	-0.0217183	1.00495	2
>sp|Q5U216|DX39A_RAT ATP-dependent RNA helicase DDX39A OS	0.0558237	1.00532	4	-0.884953	0.980067	4	-1.12977	1.01311	4	-0.52176	1.031	4
>sp|Q5U2P6|CL053_RAT Uncharacterized protein C12orf53 homolog OS	-1.04751	0.969595	1	0.00966331	0.997667	1	0.763203	0.998794	1	-0.201606	1.00407	1
>sp|Q5U2Q3|CK054_RAT Ester hydrolase C11orf54 homolog OS	-0.294282	1.01531	1	-0.166709	1.01179	1	0.495216	1.00683	1	0.716172	1.02203	1
>sp|Q5U2R0|MAT2B_RAT Methionine adenosyltransferase 2 subunit beta OS	-0.353695	1.01594	1	0.246737	1.01859	1	0.909484	0.99059	1	0.585912	1.01579	1
>sp|Q5U2V4|PLBL1_RAT Phospholipase B-like 1 OS	0.0593266	1.0043	1	-1.2966	0.865066	1	-0.32904	1.00894	1	1.72584	0.620033	1
>sp|Q5U300|UBA1_RAT Ubiquitin-like modifier-activating enzyme 1 OS	0.528579	1.02448	1	0.768379	1.01314	1	0.318074	1.00676	1	-0.0717857	1.00728	1
>sp|Q5XHZ0|TRAP1_RAT Heat shock protein 75 kDa, mitochondrial OS	0.885408	0.999676	4	0.730639	0.9943	4	0.238956	1.0045	4	-0.0891944	1.00841	4
>sp|Q5XI72|IF4H_RAT Eukaryotic translation initiation factor 4H OS	0.243271	1.01219	1	-0.0844252	0.996571	1	-0.607729	1.01089	1	-0.559267	1.02565	1
>sp|Q5XI78|ODO1_RAT 2-oxoglutarate dehydrogenase, mitochondrial OS	0.494679	1.02994	2	-1.06788	0.951918	2	-0.493726	1.00553	2	1.75197	0.602605	2
>sp|Q5XI81|FXR1_RAT Fragile X mental retardation syndrome-related protein 1 OS	0.651053	1.02016	1	-0.0747376	0.995252	1	-1.42314	0.97118	1	-1.42773	0.788206	1
>sp|Q5XI89|FA55D_RAT Protein FAM55D OS	-0.400149	1.03326	3	1.04723	0.958444	3	0.877355	1.00058	3	-0.980618	0.964894	3
>sp|Q5XIC0|ECI2_RAT Enoyl-CoA delta isomerase 2, mitochondrial OS	-2.92547	0.196162	9	-0.172724	1.01407	9	1.21451	1.02851	9	-0.14374	1.00446	9
>sp|Q5XIE6|HIBCH_RAT 3-hydroxyisobutyryl-CoA hydrolase, mitochondrial OS	0.566834	1.0185	1	3.45361	0.046187	1	2.50868	0.312765	1	-0.67266	1.01609	1
>sp|Q5XIF3|NDUS4_RAT NADH dehydrogenase [ubiquinone] iron-sulfur protein 4, mitochondrial OS	0.166123	1.02482	2	0.11949	0.998785	2	-1.14329	1.03068	2	-2.34343	0.279553	2
>sp|Q5XIH7|PHB2_RAT Prohibitin-2 OS	-0.0521314	1.00586	17	-0.99335	0.967993	17	-1.10403	1.00306	17	-0.67801	1.0181	17
>sp|Q5XIM9|TCPB_RAT T-complex protein 1 subunit beta OS	-0.0919865	1.01441	8	-1.06152	0.955791	8	-1.04115	1.00048	8	-0.504758	1.02225	8
>sp|Q5XIN1|MDM4_RAT Protein Mdm4 OS	0.600271	1.01902	1	0.610776	1.00562	1	0.577557	1.01817	1	0.711265	1.02179	1
>sp|Q5XIN6|LETM1_RAT LETM1 and EF-hand domain-containing protein 1, mitochondrial OS	1.59812	0.808732	3	2.69893	0.18737	3	0.981604	0.977082	3	-1.39416	0.805918	3
>sp|Q5XIT9|MCCB_RAT Methylcrotonoyl-CoA carboxylase beta chain, mitochondrial OS	0.281659	1.01032	4	0.775406	1.01333	4	0.633223	1.02298	4	0.145695	1.00481	4
>sp|Q60587|ECHB_RAT Trifunctional enzyme subunit beta, mitochondrial OS	-0.361573	1.01629	15	1.51235	0.806821	15	0.658424	1.01059	15	-1.4085	0.801818	15
>sp|Q60932|VDAC1_MOUSE Voltage-dependent anion-selective channel protein 1 OS	-0.412745	1.03725	4	-0.64691	1.00528	4	-0.872437	1.00275	4	-1.17481	0.874161	4
>sp|Q61598|GDIB_MOUSE Rab GDP dissociation inhibitor beta OS	0.591346	1.02321	4	1.06022	0.953954	4	1.01784	0.990204	4	0.75327	1.01649	4
>sp|Q62059|CSPG2_MOUSE Versican core protein OS	-0.0374136	1.00604	1	0.0387988	0.995274	1	0.0792794	0.991702	1	0.00240644	1.00054	1
>sp|Q62261|SPTB2_MOUSE Spectrin beta chain, brain 1 OS	-0.205066	1.01932	1	-0.264167	1.0154	1	-0.577707	1.01799	1	-0.765843	1.01648	1
>sp|Q62296|TEAD4_MOUSE Transcriptional enhancer factor TEF-3 OS	-1.21835	0.946126	1	0.133021	1.00422	1	1.11058	1.00633	1	-0.0643672	1.00631	1
>sp|Q62425|NDUA4_MOUSE NADH dehydrogenase [ubiquinone] 1 alpha subcomplex subunit 4 OS	-0.313363	1.0164	5	0.571484	1.01067	5	1.19707	1.01788	5	1.06559	1.00509	5
>sp|Q62636|RAP1B_RAT Ras-related protein Rap-1b OS	0.0858395	1.00907	4	-0.473495	1.01519	4	-0.15092	1.00206	4	0.844276	0.979105	4
>sp|Q62651|ECH1_RAT Delta(3,5)-Delta(2,4)-dienoyl-CoA isomerase, mitochondrial OS	-1.30074	0.924268	16	0.213828	1.0148	16	0.660316	1.00818	16	-0.686564	1.02775	16
>sp|Q62656|PTPRZ_RAT Receptor-type tyrosine-protein phosphatase zeta OS	0.228528	1.01423	1	-0.547455	1.00556	1	0.136659	0.997422	1	1.42328	0.787333	1
>sp|Q62730|DHB2_RAT Estradiol 17-beta-dehydrogenase 2 OS	0.342477	1.01912	7	1.51682	0.808797	7	0.374202	1.00842	7	-2.3892	0.268838	7
>sp|Q62736|CALD1_RAT Non-muscle caldesmon OS	-1.64902	0.799921	7	-2.69178	0.191435	7	-1.83143	0.751738	7	-0.262155	1.00246	7
>sp|Q62764|DBPA_RAT DNA-binding protein A OS	0.64105	1.02197	1	-0.157835	1.00937	1	-0.0105432	1.00082	1	1.0396	0.934107	1
>sp|Q62774|MYO1A_RAT Myosin-Ia (Fragment) OS	0.789684	1.01246	1	0.506575	1.01367	1	-0.219337	1.00053	1	-0.191453	1.00911	1
>sp|Q62780|DDX46_RAT Probable ATP-dependent RNA helicase DDX46 OS	0.72294	1.01292	1	0.175809	1.01622	1	-0.931594	0.980469	1	-0.909854	0.972521	1
>sp|Q62789|UD2B7_RAT UDP-glucuronosyltransferase 2B7 OS				-3.00078	0.124919	1
>sp|Q62812|MYH9_RAT Myosin-9 OS	1.93111	0.66998	15	-0.00166807	0.999866	15	-1.57735	0.937308	15	-1.24134	0.866461	15
>sp|Q62826|HNRPM_RAT Heterogeneous nuclear ribonucleoprotein M OS	-0.78158	1.01354	8	-0.927624	0.96806	8	-0.959016	0.978354	8	-1.24429	0.868545	8
>sp|Q62844|FYN_RAT Tyrosine-protein kinase Fyn OS	1.43621	0.869895	1	0.752503	1.00858	1	-0.181551	0.998386	1	0.225455	1.00551	1
>sp|Q62902|LMAN1_RAT Protein ERGIC-53 OS	1.60852	0.81357	6	0.596421	1.00876	6	0.0189582	0.999005	6	0.934522	0.976728	6
>sp|Q62930|CO9_RAT Complement component C9 OS	0.0817908	1.0086	1	-0.0181167	0.996284	1	0.875421	0.998497	1	1.23809	0.862734	1
>sp|Q63010|EST5_RAT Liver carboxylesterase B-1 OS	-0.569276	1.02105	1	0.712102	0.994488	1	0.912805	0.989135	1	-0.281818	1.00526	1
>sp|Q63041|A1M_RAT Alpha-1-macroglobulin OS	-0.0103585	1.00572	11	0.415725	1.01127	11	-0.50344	1.00749	11	-2.43461	0.237354	11
>sp|Q63060|GLPK_RAT Glycerol kinase OS	0.516652	1.02806	3	0.0897488	0.997153	3	-0.205689	1.00222	3	-0.0347034	1.0064	3
>sp|Q63081|PDIA6_RAT Protein disulfide-isomerase A6 OS	-1.179	0.959391	7	1.38732	0.847004	7	0.96439	0.979256	7	-2.29629	0.30064	7
>sp|Q63108|EST3_RAT Liver carboxylesterase 3 OS	-0.00293729	1.00372	2	1.62839	0.757663	2	1.44053	0.96987	2	-0.298932	1.00595	2
>sp|Q63150|DPYS_RAT Dihydropyrimidinase OS	1.06679	0.959749	4	1.99586	0.511568	4	1.4318	0.966703	4	0.432122	1.01314	4
>sp|Q63270|ACOC_RAT Cytoplasmic aconitate hydratase OS	0.175251	1.02587	5	0.555819	1.00397	5	1.00572	0.991191	5	1.24186	0.865676	5
>sp|Q63276|BAAT_RAT Bile acid-CoA:amino acid N-acyltransferase OS	-1.79726	0.729112	9	-0.167673	1.01232	9	0.461253	1.01762	9	-0.697255	1.02161	9
>sp|Q63342|M2GD_RAT Dimethylglycine dehydrogenase, mitochondrial OS	-1.55721	0.840522	12	-0.354392	1.01299	12	0.560761	1.01398	12	0.545293	1.02582	12
>sp|Q63362|NDUA5_RAT NADH dehydrogenase [ubiquinone] 1 alpha subcomplex subunit 5 OS	-2.24957	0.499804	2	-0.365929	1.01452	2	0.49416	1.00503	2	-1.053	0.93091	2
>sp|Q63396|TCP4_RAT Activated RNA polymerase II transcriptional coactivator p15 OS	0.382768	1.01925	1	-0.937644	0.971408	1	-1.89048	0.71756	1	-1.09001	0.913776	1
>sp|Q63429|UBC_RAT Polyubiquitin-C OS	-2.77185	0.236392	4	-1.36083	0.855041	4	-0.529903	1.00768	4	-1.62135	0.673623	4
>sp|Q63448|ACOX3_RAT Peroxisomal acyl-coenzyme A oxidase 3 OS	-0.104345	1.01373	2	0.240433	1.01706	2	0.283584	1.01037	2	-0.135941	1.00723	2
>sp|Q63507|RL14_RAT 60S ribosomal protein L14 OS	-0.305064	1.00928	7	-1.40053	0.852729	7	-1.05696	1.0094	7	0.324885	1.01366	7
>sp|Q63524|TMED2_RAT Transmembrane emp24 domain-containing protein 2 OS	0.896165	0.995532	1	0.615304	1.00453	1	-0.00394499	1.00116	1	0.0760643	1.00895	1
>sp|Q63584|TMEDA_RAT Transmembrane emp24 domain-containing protein 10 OS	1.92349	0.666728	5	0.909717	0.980845	5	-1.33171	1.01186	5	-3.00279	0.0762191	5
>sp|Q63598|PLST_RAT Plastin-3 OS	0.0766509	1.0084	1	-0.175181	1.01465	1	0.174282	0.99931	1	0.666782	1.01357	1
>sp|Q63610|TPM3_RAT Tropomyosin alpha-3 chain OS	-2.11019	0.594112	9	-1.22409	0.878419	9	0.259915	1.00818	9	1.32866	1.0074	9
>sp|Q63617|HYOU1_RAT Hypoxia up-regulated protein 1 OS	-0.44648	1.0401	1	-0.71885	0.989497	1	0.082457	0.992905	1	0.74356	1.02118	1
>sp|Q63639|AL1A2_RAT Retinal dehydrogenase 2 OS	-0.670671	1.01841	1	0.13533	1.00691	1	-0.397096	1.0154	1	-1.89559	0.538373	1
>sp|Q63707|PYRD_RAT Dihydroorotate dehydrogenase (quinone), mitochondrial OS	0.506914	1.02907	2	1.42287	0.836485	2	1.27792	1.01639	2	0.489622	1.02324	2
>sp|Q63716|PRDX1_RAT Peroxiredoxin-1 OS	-1.28103	0.93531	10	-0.721902	0.989285	10	0.0211383	1.01139	10	-0.220363	1.00462	10
>sp|Q63798|PSME2_RAT Proteasome activator complex subunit 2 OS	0.382198	1.01719	1	0.0309616	0.995569	1	-0.240315	1.0055	1	0.0075818	1.00197	1
>sp|Q63870|CO7A1_MOUSE Collagen alpha-1(VII) chain OS	-0.0930693	1.01347	1	0.163171	1.01151	1	0.608795	1.01655	1	0.584361	1.01769	1
>sp|Q63965|SFXN1_RAT Sideroflexin-1 OS	0.418756	1.04013	6	-0.7589	1.01771	6	-0.867927	0.999547	6	0.18663	1.00623	6
>sp|Q64057|AL7A1_RAT Alpha-aminoadipic semialdehyde dehydrogenase OS	0.11817	1.01587	9	0.950914	0.980329	9	1.08662	1.01061	9	0.372615	1.00798	9
>sp|Q64060|DDX4_RAT Probable ATP-dependent RNA helicase DDX4 OS	-0.186188	1.023	1	-0.433705	1.01067	1	-0.365105	1.00836	1	-0.145482	1.005	1
>sp|Q64096|MCF2L_MOUSE Guanine nucleotide exchange factor DBS OS	-2.17433	0.55159	1	-0.48911	1.01395	1	0.934033	0.98032	1	0.0980836	1.00748	1
>sp|Q64119|MYL6_RAT Myosin light polypeptide 6 OS	0.235617	1.01349	2	-0.327558	1.01324	2	-0.336162	1.01008	2	0.307821	1.00683	2
>sp|Q64152-2|BTF3_MOUSE Isoform 2 of Transcription factor BTF3 OS	-0.81738	1.00481	1	-0.823887	0.995212	1	-0.15937	1.00008	1	0.0272264	1.00425	1
>sp|Q641X3|HEXA_RAT Beta-hexosaminidase subunit alpha OS	-0.0820392	1.00839	3	-0.0913462	0.997715	3	-0.436596	1.02286	3	-0.894431	0.97202	3
>sp|Q641Y0|OST48_RAT Dolichyl-diphosphooligosaccharide--protein glycosyltransferase 48 kDa subunit OS	-0.302038	1.00991	10	-0.0470772	0.995229	10	0.385038	1.00845	10	0.678376	1.02148	10
>sp|Q641Y2|NDUS2_RAT NADH dehydrogenase [ubiquinone] iron-sulfur protein 2, mitochondrial OS	0.0206646	1.00726	7	0.661719	1.00427	7	0.334968	1.00707	7	-0.0272579	1.00613	7
>sp|Q641Y8|DDX1_RAT ATP-dependent RNA helicase DDX1 OS	-1.28704	0.933403	10	-0.847006	0.993966	10	-0.545343	1.01174	10	-1.03814	0.936238	10
>sp|Q64232|TECR_RAT Trans-2,3-enoyl-CoA reductase OS	1.2404	0.935059	2	0.799054	1.01072	2	0.151084	1.00191	2	0.295439	1.00538	2
>sp|Q642A7|F151A_RAT Protein FAM151A OS	3.21543	0.134645	1	1.5229	0.808319	1	-0.935837	0.981095	1	0.202021	1.0059	1
>sp|Q64380|SARDH_RAT Sarcosine dehydrogenase, mitochondrial OS	-0.300639	1.01132	11	0.819619	0.998208	11	1.16675	1.04112	11	0.626763	1.01298	11
>sp|Q64428|ECHA_RAT Trifunctional enzyme subunit alpha, mitochondrial OS	-1.36545	0.892393	29	1.14028	0.918751	29	1.19199	1.03348	29	-1.34774	0.829465	29
>sp|Q64550|UD11_RAT UDP-glucuronosyltransferase 1-1 OS	-1.31685	0.91944	9	-0.499299	1.01211	9	-0.145416	1.00279	9	-0.525741	1.03499	9
>sp|Q64560|TPP2_RAT Tripeptidyl-peptidase 2 OS	0.0590151	1.00456	1	-0.256477	1.01676	1	0.372426	1.00766	1	1.05045	0.929165	1
>sp|Q64565|AGT2_RAT Alanine--glyoxylate aminotransferase 2, mitochondrial OS	0.55288	1.01899	4	1.23829	0.867635	4	0.520191	1.00757	4	-0.950905	0.970005	4
>sp|Q64573|EST4_RAT Liver carboxylesterase 4 OS	0.319449	1.02099	4	3.07136	0.107836	4	2.20786	0.540432	4	-1.11469	0.898393	4
>sp|Q64578|AT2A1_RAT Sarcoplasmic/endoplasmic reticulum calcium ATPase 1 OS	-0.312615	1.01469	1	-0.46718	1.01463	1	-0.92606	0.978401	1	-1.23957	0.860535	1
>sp|Q64581|CP3AI_RAT Cytochrome P450 3A18 OS	1.20345	0.962953	3	2.41734	0.283803	3	1.91544	0.721122	3	0.259557	1.0011	3
>sp|Q64591|DECR_RAT 2,4-dienoyl-CoA reductase, mitochondrial OS	-2.65412	0.253991	21	-0.214699	1.01546	21	-0.0376033	1.0043	21	-2.81474	0.103954	21
>sp|Q64602|AADAT_RAT Kynurenine/alpha-aminoadipate aminotransferase, mitochondrial OS	0.33019	1.02426	4	1.42042	0.840326	4	1.2885	1.00706	4	0.0750438	1.00782	4
>sp|Q64611|CSAD_RAT Cysteine sulfinic acid decarboxylase OS	0.013499	1.00503	9	1.72749	0.731312	9	1.77264	0.816085	9	0.302475	1.00729	9
>sp|Q64638|UD15_RAT UDP-glucuronosyltransferase 1-5 OS	-1.15488	0.952253	2	0.394214	1.0158	2	1.14217	1.02489	2	-0.0384984	1.00712	2
>sp|Q64640|ADK_RAT Adenosine kinase OS	0.716043	1.01546	3	1.03588	0.956935	3	0.343458	1.01021	3	-0.457112	1.02804	3
>sp|Q64654|CP51A_RAT Lanosterol 14-alpha demethylase OS	-1.77558	0.746287	1	-1.10599	0.934959	1	0.6081	1.01391	1	0.580912	1.01849	1
>sp|Q64FW2|RETST_MOUSE All-trans-retinol 13,14-reductase OS	0.343891	1.01936	2	-0.688272	1.00544	2	-0.567949	1.01749	2	0.801802	1.0006	2
>sp|Q66H80|COPD_RAT Coatomer subunit delta OS	-0.124119	1.01958	2	0.0950479	0.999056	2	0.270199	1.00603	2	0.131872	1.00736	2
>sp|Q66HD0|ENPL_RAT Endoplasmin OS	-0.865871	1.00847	16	1.0342	0.953968	16	0.558274	1.01367	16	-2.50226	0.186226	16
>sp|Q66HF1|NDUS1_RAT NADH-ubiquinone oxidoreductase 75 kDa subunit, mitochondrial OS	0.138754	1.02186	19	0.59196	1.0109	19	0.260832	1.00812	19	-0.780462	1.01092	19
>sp|Q66HG4|GALM_RAT Aldose 1-epimerase OS	0.384983	1.02316	1	-0.134738	1.0054	1	-0.23732	1.00608	1	0.226302	1.00471	1
>sp|Q66HG5|TM9S2_RAT Transmembrane 9 superfamily member 2 OS	-1.12057	0.949944	3	0.24422	1.01643	3	0.67134	1.01022	3	-0.822897	0.995163	3
>sp|Q66JV7|CH058_MOUSE Uncharacterized protein C8orf58 homolog OS	-0.334377	1.02245	1	0.372903	1.01578	1	1.00153	0.991803	1	0.550807	1.02583	1
>sp|Q66X93|SND1_RAT Staphylococcal nuclease domain-containing protein 1 OS	-3.04563	0.174568	39	-0.284068	1.01449	39	0.534219	1.02599	39	-1.71151	0.551799	39
>sp|Q68FP2|PON3_RAT Serum paraoxonase/lactonase 3 OS	1.32739	0.915802	5	0.52146	1.0125	5	0.823432	0.985356	5	2.23513	0.335475	5
>sp|Q68FQ0|TCPE_RAT T-complex protein 1 subunit epsilon OS	1.19784	0.959894	10	-1.06842	0.951109	10	-1.30708	1.01259	10	0.667046	1.01574	10
>sp|Q68FR6|EF1G_RAT Elongation factor 1-gamma OS	0.341489	1.02015	6	1.04542	0.955576	6	0.166325	1.00157	6	-1.69852	0.636839	6
>sp|Q68FR9|EF1D_RAT Elongation factor 1-delta OS	0.29349	1.01611	2	-0.23453	1.01594	2	-0.560098	1.01148	2	-0.287233	1.00469	2
>sp|Q68FS4|AMPL_RAT Cytosol aminopeptidase OS	-0.518354	1.02921	6	0.639979	1.00699	6	0.968568	0.981976	6	0.167885	1.00534	6
>sp|Q68FT3|PYRD2_RAT Pyridine nucleotide-disulfide oxidoreductase domain-containing protein 2 OS	0.23494	1.01414	2	-0.192444	1.01956	2	-0.0287703	0.997288	2	0.649557	1.01446	2
>sp|Q68FT5|BHMT2_RAT Betaine--homocysteine S-methyltransferase 2 OS	-1.40512	0.896993	4	0.563412	1.00861	4	1.34858	0.998502	4	0.116431	1.00441	4
>sp|Q68FU3|ETFB_RAT Electron transfer flavoprotein subunit beta OS	-0.855041	1.00347	11	0.465774	1.0143	11	0.743191	1.01181	11	-0.638031	1.01685	11
>sp|Q68FY0|QCR1_RAT Cytochrome b-c1 complex subunit 1, mitochondrial OS	-0.40454	1.03593	9	0.650081	1.00952	9	0.360404	1.00633	9	-1.39757	0.810708	9
>sp|Q68G31|PBLD_RAT Phenazine biosynthesis-like domain-containing protein OS	0.40696	1.03513	5	0.143027	1.00891	5	-0.0154641	0.999962	5	-0.0654731	1.00734	5
>sp|Q6AXM8|PON2_RAT Serum paraoxonase/arylesterase 2 OS	0.291238	1.01353	2	1.0221	0.953898	2	0.857594	1.00308	2	0.493052	1.02443	2
>sp|Q6AXN9|RIBC2_RAT RIB43A-like with coiled-coils protein 2 OS	-0.320312	1.02178	1	-1.29409	0.864308	1	-1.10806	1.01045	1	-0.0862776	1.01092	1
>sp|Q6AXR4|HEXB_RAT Beta-hexosaminidase subunit beta OS	0.363142	1.01724	2	0.709032	0.99473	2	-0.338159	1.01057	2	-1.53738	0.744286	2
>sp|Q6AXS3|DEK_RAT Protein DEK OS	-0.0192683	1.00653	1	-0.139626	1.00853	1	0.337622	1.01113	1	0.758257	1.02252	1
>sp|Q6AXT7|RBM42_RAT RNA-binding protein 42 OS	0.686931	1.02258	1	-0.0798247	0.993487	1	-0.6098	1.01882	1	0.00862775	1.00238	1
>sp|Q6AXV4|SAM50_RAT Sorting and assembly machinery component 50 homolog OS	0.863349	1.00732	2	1.34281	0.860586	2	0.0694011	0.992911	2	-1.25836	0.860606	2
>sp|Q6AY09|HNRH2_RAT Heterogeneous nuclear ribonucleoprotein H2 OS	-0.313103	1.01419	2	-0.126346	1.00273	2	-0.725834	1.00911	2	-1.66253	0.660602	2
>sp|Q6AY30|SCPDH_RAT Probable saccharopine dehydrogenase OS	0.950873	0.986247	4	-0.164633	1.01229	4	-1.10629	1.00633	4	-0.972483	0.959349	4
>sp|Q6AY56|TBA8_RAT Tubulin alpha-8 chain OS	1.13025	0.947549	1	2.55745	0.222901	1	0.259925	1.00665	1	-1.53649	0.745593	1
>sp|Q6AY78|S22AI_RAT Solute carrier family 22 member 18 OS	1.06463	0.963019	1	0.750814	1.00681	1	-2.08297	0.593871	1	-3.44189	0.0246874	1
>sp|Q6AYA1|GAR1_RAT H/ACA ribonucleoprotein complex subunit 1 OS	0.0684304	1.00499	1	-0.518693	1.01269	1	-1.59709	0.943476	1	-1.77708	0.595638	1
>sp|Q6AYK1|RNPS1_RAT RNA-binding protein with serine-rich domain 1 OS	1.18395	0.963202	1	0.900621	0.982734	1	-0.536419	1.00528	1	-1.41304	0.795068	1
>sp|Q6AYK2|JMJD6_RAT Bifunctional arginine demethylase and lysyl-hydroxylase JMJD6 OS	-0.0272959	1.00621	1	0.297291	1.01719	1	0.413861	1.01565	1	0.123433	1.00443	1
>sp|Q6AYQ2|AK1CL_RAT Aldo-keto reductase family 1 member C21 OS	1.96515	0.633345	2	1.78808	0.688183	2	1.22199	1.03592	2	1.63107	0.67096	2
>sp|Q6AYQ8|FAHD1_RAT Fumarylacetoacetate hydrolase domain-containing protein 1 OS	0.66378	1.01735	1	0.630999	1.00665	1	0.111602	0.993637	1	-0.0280027	1.00552	1
>sp|Q6AYS7|ACY1A_RAT Aminoacylase-1A OS	0.308675	1.0105	2	0.246458	1.01655	2	0.192444	1.00063	2	0.425873	1.00872	2
>sp|Q6AYS8|DHB11_RAT Estradiol 17-beta-dehydrogenase 11 OS	0.185586	1.02209	10	0.681653	1.02134	10	-0.538836	1.00877	10	-1.82557	0.580497	10
>sp|Q6AYZ1|TBA1C_RAT Tubulin alpha-1C chain OS	-0.292776	1.0144	13	0.553352	1.00481	13	0.713267	1.00842	13	0.157608	1.00185	13
>sp|Q6B966|NAL14_MOUSE NACHT, LRR and PYD domains-containing protein 14 OS	-0.3091	1.01007	1	-0.265972	1.01518	1	0.255812	1.00442	1	0.439325	1.02635	1
>sp|Q6DGG1|ABHEB_RAT Abhydrolase domain-containing protein 14B OS	1.08873	0.946079	4	0.62857	1.00624	4	0.0833132	0.994131	4	0.163711	1.00199	4
>sp|Q6F6B3|TANC1_RAT Protein TANC1 OS	-0.2889	1.01346	1	0.563256	1.00667	1	1.0418	1.00571	1	0.37429	1.00621	1
>sp|Q6I7R3|ISOC1_RAT Isochorismatase domain-containing protein 1 OS	0.517452	1.02711	1	0.768241	1.01333	1	0.0473942	0.995885	1	-0.53152	1.03135	1
>sp|Q6IE24|UBP54_RAT Inactive ubiquitin carboxyl-terminal hydrolase 54 OS	1.07194	0.96171	1	0.696052	0.999115	1	0.411253	1.01664	1	0.845072	0.982472	1
>sp|Q6IFV1|K1C14_RAT Keratin, type I cytoskeletal 14 OS	2.19401	0.555955	1	-0.335118	1.01124	1	-1.81068	0.733683	1	-0.201239	1.00378	1
>sp|Q6IFV3|K1C15_RAT Keratin, type I cytoskeletal 15 OS	-2.15671	0.563965	3	-2.07207	0.466362	3	2.67176	0.216214	3	6.71709	1.00517	3
>sp|Q6IFV4|K1C13_RAT Keratin, type I cytoskeletal 13 OS	-0.161646	1.02386	1	-0.279593	1.01421	1	0.137509	0.998129	1	0.498671	1.03626	1
>sp|Q6IFW6|K1C10_RAT Keratin, type I cytoskeletal 10 OS	-0.649362	1.02232	11	-1.89509	0.584655	9	-0.165877	1.00281	11	3.05832	0.0568437	11
>sp|Q6IFX2|K1C42_MOUSE Keratin, type I cytoskeletal 42 OS				-2.31087	0.322251	1
>sp|Q6IG00|K2C4_RAT Keratin, type II cytoskeletal 4 OS	0.0481594	1.00535	2	-0.171454	1.0131	2	-0.0487056	0.99653	2	0.30613	1.00862	2
>sp|Q6IG01|K2C1B_RAT Keratin, type II cytoskeletal 1b OS	-2.73226	0.247713	4	-2.09974	0.45577	4	1.40237	0.944367	4	3.71686	1.0032	4
>sp|Q6IG02|K22E_RAT Keratin, type II cytoskeletal 2 epidermal OS	1.02235	0.98284	5	-0.639216	1.00794	5	-0.344791	1.00553	5	1.92325	0.480767	5
>sp|Q6IG04|K2C72_RAT Keratin, type II cytoskeletal 72 OS	1.56657	0.835667	1	0.519052	1.01227	1	-0.737046	0.997837	1	-0.118848	1.00599	1
>sp|Q6IG05|K2C75_RAT Keratin, type II cytoskeletal 75 OS	-1.01679	0.974302	1	-0.279724	1.01408	1	0.906788	0.980308	1	0.608096	1.00961	1
>sp|Q6IMF3|K2C1_RAT Keratin, type II cytoskeletal 1 OS	-0.878295	1.00026	3	-2.57328	0.218488	3	-1.34623	0.974395	3	1.76415	0.558406	3
>sp|Q6IRK9|PGCP_RAT Plasma glutamate carboxypeptidase OS	0.618955	1.02244	1	2.86757	0.160645	1	2.27595	0.488851	1	-0.283517	1.00597	1
>sp|Q6IRU2|TPM4_MOUSE Tropomyosin alpha-4 chain OS	-0.938462	0.987312	1	-1.03723	0.960414	1	-0.0293963	0.998659	1	0.709248	1.02177	1
>sp|Q6MG08|ABCF1_RAT ATP-binding cassette sub-family F member 1 OS	0.051147	1.00477	1	0.302273	1.01457	1	0.809426	0.985662	1	0.901285	0.971852	1
>sp|Q6MGB5|DHB8_RAT Estradiol 17-beta-dehydrogenase 8 OS	-0.631044	1.01906	6	-0.100695	0.998085	6	0.347934	1.01072	6	-0.0174439	1.00338	6
>sp|Q6NS45|CCD66_MOUSE Coiled-coil domain-containing protein 66 OS	0.417515	1.04153	1	0.325967	1.0124	1	-0.186618	0.999485	1	-0.326159	1.0149	1
>sp|Q6NVF9|CPSF6_MOUSE Cleavage and polyadenylation specificity factor subunit 6 OS	0.889699	0.998351	1	-0.63424	1.00606	1	-1.05983	1.01134	1	0.432733	1.01532	1
>sp|Q6NZF1|ZC11A_MOUSE Zinc finger CCCH domain-containing protein 11A OS	-0.531429	1.02428	1	-0.185225	1.01903	1	-0.266691	1.00711	1	-0.871515	0.974584	1
>sp|Q6P0K8|PLAK_RAT Junction plakoglobin OS	0.515105	1.02673	1	0.198732	1.01951	1	0.417003	1.02066	1	0.765638	1.01676	1
>sp|Q6P502|TCPG_RAT T-complex protein 1 subunit gamma OS	0.18875	1.02282	4	-1.37969	0.843456	4	-0.802704	0.994796	4	1.2587	0.864499	4
>sp|Q6P6G7|RLP24_RAT Probable ribosome biogenesis protein RLP24 OS	0.23661	1.01405	1	1.58564	0.791635	1	2.55478	0.287954	1	1.91725	0.527385	1
>sp|Q6P6Q2|K2C5_RAT Keratin, type II cytoskeletal 5 OS	-1.11507	0.948072	3	-1.85397	0.626186	3	0.61262	1.00525	3	3.6776	0.0105631	3
>sp|Q6P6Q9|MICU1_RAT Calcium uptake protein 1, mitochondrial OS	1.58131	0.825594	1	1.12689	0.929014	1	-1.85274	0.747715	1	-2.97207	0.0800625	1
>sp|Q6P6R2|DLDH_RAT Dihydrolipoyl dehydrogenase, mitochondrial OS	-1.22568	0.946519	6	-0.30654	1.01591	6	0.652401	1.01088	6	0.455296	1.02411	6
>sp|Q6P6V0|G6PI_RAT Glucose-6-phosphate isomerase OS	0.320514	1.02157	4	-0.106688	0.997462	4	-0.302813	1.00901	4	0.113045	1.00464	4
>sp|Q6P747|HP1B3_RAT Heterochromatin protein 1-binding protein 3 OS	0.0366882	1.00664	1	-1.21073	0.885952	1	-1.80239	0.785361	1	-0.938582	0.974247	1
>sp|Q6P7R8|DHB12_RAT Estradiol 17-beta-dehydrogenase 12 OS	-0.164124	1.02448	4	0.13523	1.00496	4	-0.308377	1.00586	4	-0.897277	0.968037	4
>sp|Q6P9T8|TBB2C_RAT Tubulin beta-2C chain OS	-0.753298	1.01138	12	0.307149	1.01773	12	0.816727	0.990148	12	0.856451	0.981789	12
>sp|Q6PD03|2A5A_MOUSE Serine/threonine-protein phosphatase 2A 56 kDa regulatory subunit alpha isoform OS	-0.99258	0.981131	1	-0.748378	1.00075	1	-0.363655	1.00553	1	-0.636405	1.01527	1
>sp|Q6PDM2|SRSF1_MOUSE Serine/arginine-rich splicing factor 1 OS	1.34483	0.909343	8	0.36874	1.01586	8	-0.118611	1.01347	8	0.35988	1.01262	8
>sp|Q6RT24|CENPE_MOUSE Centromere-associated protein E OS	0.956255	0.988733	1	0.356645	1.01063	1	-0.176793	0.99916	1	0.356153	1.01391	1
>sp|Q6SKG1|ACSM3_RAT Acyl-coenzyme A synthetase ACSM3, mitochondrial OS	-2.88858	0.200023	1	-1.73924	0.72449	1	0.0475379	0.997672	1	-0.399081	1.00474	1
>sp|Q6TEK4|VKOR1_RAT Vitamin K epoxide reductase complex subunit 1 OS	0.159961	1.02107	1	-1.54157	0.794232	1	-0.83654	0.985016	1	1.23091	0.867025	1
>sp|Q6U6G5|ZC3HF_RAT Zinc finger CCCH domain-containing protein 15 OS	-0.457428	1.03653	3	-0.188496	1.01961	3	-0.0533638	0.996671	3	0.134832	1.00612	3
>sp|Q6UPE1|ETFD_RAT Electron transfer flavoprotein-ubiquinone oxidoreductase, mitochondrial OS	-0.745691	1.00397	17	1.64148	0.747392	17	1.44948	0.984982	17	-1.45851	0.778122	17
>sp|Q6WRH9|IGS10_RAT Immunoglobulin superfamily member 10 OS	-0.698406	1.01527	1	0.350817	1.0125	1	1.04908	1.00266	1	0.20783	1.00342	1
>sp|Q6ZWN5|RS9_MOUSE 40S ribosomal protein S9 OS	0.0916454	1.01471	2	-0.45799	1.01258	2	0.145018	1.00106	2	1.26887	0.860321	2
>sp|Q6ZWV3|RL10_MOUSE 60S ribosomal protein L10 OS	1.16638	0.961063	8	-0.261492	1.01415	8	-0.323852	1.00754	8	1.38472	0.812666	8
>sp|Q6ZWX6|IF2A_MOUSE Eukaryotic translation initiation factor 2 subunit 1 OS	-0.170826	1.02631	6	0.117678	0.99839	6	-0.161715	1.00149	6	-1.03971	0.939391	6
>sp|Q6ZWY3|RS27L_MOUSE 40S ribosomal protein S27-like OS	1.97145	0.633898	2	-0.0847442	0.996299	2	-1.71308	0.859577	2	-0.750006	1.02092	2
>sp|Q71HP2|BHLH9_RAT Protein BHLHb9 OS	0.842963	1.00054	1	1.35585	0.862819	1	0.276915	1.00735	1	-0.727264	1.02088	1
>sp|Q71S46|AT5G3_RAT ATP synthase lipid-binding protein, mitochondrial OS	1.19789	0.964657	1	0.462164	1.0155	1	-0.797087	0.995253	1	-0.521014	1.02971	1
>sp|Q71UF4|RBBP7_RAT Histone-binding protein RBBP7 OS	2.07179	0.591815	1	0.0471741	0.996383	1	-1.36035	1.00521	1	-0.115819	1.00358	1
>sp|Q75Q39|TOM70_RAT Mitochondrial import receptor subunit TOM70 OS	0.678588	1.02453	2	0.230054	1.01723	2	-0.29004	1.00878	2	-0.124597	1.00479	2
>sp|Q76MZ3|2AAA_MOUSE Serine/threonine-protein phosphatase 2A 65 kDa regulatory subunit A alpha isoform OS	0.392338	1.027	1	0.415531	1.01148	1	0.350419	1.01072	1	0.391256	1.00504	1
>sp|Q78XF5|OSTC_MOUSE Oligosaccharyltransferase complex subunit OSTC OS	0.682218	1.02619	1	-0.0804198	0.994881	1	-0.3869	1.01455	1	0.116837	1.00611	1
>sp|Q7M0E3|DEST_RAT Destrin OS	-0.316796	1.01454	2	-1.26895	0.86662	2	-0.256519	1.00763	2	1.56733	0.717244	2
>sp|Q7M767|UB2V2_RAT Ubiquitin-conjugating enzyme E2 variant 2 OS	-0.109581	1.01457	1	0.143908	1.01018	1	0.496937	1.00687	1	0.414931	1.00583	1
>sp|Q7TMD5|ZC3HE_RAT Zinc finger CCCH domain-containing protein 14 OS	-1.07231	0.961155	1	-0.321784	1.01177	1	1.14287	1.0314	1	0.986453	0.961665	1
>sp|Q7TMM9|TBB2A_MOUSE Tubulin beta-2A chain OS	-0.518241	1.02935	2	0.187255	1.01931	2	0.912587	0.989449	2	0.745626	1.02261	2
>sp|Q7TP47|HNRPQ_RAT Heterogeneous nuclear ribonucleoprotein Q OS	0.137836	1.01915	2	-0.421433	1.01228	2	-0.995386	0.989686	2	-1.03424	0.936519	2
>sp|Q7TP48|APMAP_RAT Adipocyte plasma membrane-associated protein OS	1.14768	0.952576	5	1.4687	0.825766	5	0.905307	0.991622	5	0.218641	1.00519	5
>sp|Q7TP52|CMBL_RAT Carboxymethylenebutenolidase homolog OS	0.63459	1.02174	4	0.419921	1.01121	4	0.16551	1.00018	4	0.240445	1.00337	4
>sp|Q7TPB1|TCPD_RAT T-complex protein 1 subunit delta OS	0.0645797	1.00631	8	-1.58539	0.792034	8	-1.10658	1.00585	8	1.09748	0.908473	8
>sp|Q7TPJ0|SSRA_RAT Translocon-associated protein subunit alpha OS	-0.923062	0.987889	3	0.446609	1.01307	3	1.07056	1.00599	3	0.717001	1.02501	3
>sp|Q7TQ16|QCR8_RAT Cytochrome b-c1 complex subunit 8 OS	1.22548	0.94194	3	0.903981	0.984265	3	-0.247259	1.0065	3	-0.629017	1.01373	3
>sp|Q7TS56|CBR4_RAT Carbonyl reductase family member 4 OS	-1.00312	0.978154	2	-0.495421	1.01064	2	0.756965	1.00301	2	1.08302	0.911005	2
>sp|Q7TSH3|ZN516_MOUSE Zinc finger protein 516 OS	0.347835	1.01694	1	0.528686	1.01427	1	0.717116	1.00732	1	0.739727	1.02637	1
>sp|Q7TT49|MRCKB_RAT Serine/threonine-protein kinase MRCK beta OS	-0.197236	1.02226	2	-0.485138	1.01164	2	0.24101	1.00713	2	1.05962	0.926725	2
>sp|Q7Z3Y8|K1C27_HUMAN Keratin, type I cytoskeletal 27 OS	0.762502	1.0086	1	-0.992865	0.963481	1	0.0579394	0.996988	1	2.00237	0.429181	1
>sp|Q80VM7|ANR24_MOUSE Ankyrin repeat domain-containing protein 24 OS	0.032122	1.00412	1	0.414396	1.01092	1	0.166316	0.999447	1	-0.419154	1.00677	1
>sp|Q80W89|NDUAB_RAT NADH dehydrogenase [ubiquinone] 1 alpha subcomplex subunit 11 OS	1.79445	0.73363	2	1.15589	0.907244	2	0.171543	0.999668	2	0.433178	1.01483	2
>sp|Q80XN0|BDH_MOUSE D-beta-hydroxybutyrate dehydrogenase, mitochondrial OS	-0.0862432	1.01071	1	1.57534	0.78831	1	2.46834	0.334421	1	1.27244	0.868483	1
>sp|Q80YR4|ZN598_MOUSE Zinc finger protein 598 OS	1.02173	0.978079	1	1.85162	0.629497	1	0.844458	0.989038	1	-0.405922	1.00644	1
>sp|Q80YV3|TRRAP_MOUSE Transformation/transcription domain-associated protein OS	0.0496926	1.00598	1	0.628104	1.00339	1	0.998966	0.989962	1	0.601339	1.0187	1
>sp|Q80Z29|NAMPT_RAT Nicotinamide phosphoribosyltransferase OS	0.314916	1.01647	2	-0.0813772	0.995974	2	0.58071	1.01659	2	1.69904	0.641773	2
>sp|Q811U3|RB6I2_RAT ELKS/Rab6-interacting/CAST family member 1 OS	-0.651115	1.02375	1	1.23454	0.869046	1	1.21171	1.03341	1	-0.284676	1.00482	1
>sp|Q8BGY2|IF5A2_MOUSE Eukaryotic translation initiation factor 5A-2 OS	-0.453028	1.03859	2	1.50404	0.808003	2	2.59715	0.268146	2	1.53538	0.739045	2
>sp|Q8BP67|RL24_MOUSE 60S ribosomal protein L24 OS	-0.00534086	1.00363	7	-1.26114	0.856727	7	-1.04131	1.00022	7	0.301276	1.0085	7
>sp|Q8BW94|DYH3_MOUSE Dynein heavy chain 3, axonemal OS	-1.26517	0.935187	1	0.0158384	0.996915	1	0.275862	1.006	1	-1.34799	0.829092	1
>sp|Q8BWY3|ERF1_MOUSE Eukaryotic peptide chain release factor subunit 1 OS	-1.47396	0.863836	5	0.132351	1.00279	5	0.824851	1.0011	5	-0.419312	1.00659	5
>sp|Q8C196|CPSM_MOUSE Carbamoyl-phosphate synthase [ammonia], mitochondrial OS	-0.518401	1.02916	1	0.16341	1.01129	1	1.00934	0.991476	1	0.685509	1.02518	1
>sp|Q8CCJ4|F123A_MOUSE Protein FAM123A OS	0.0129595	1.00362	1	-0.460426	1.0146	1	-0.427035	1.02483	1	0.0761247	1.0089	1
>sp|Q8CCP0|NEMF_MOUSE Nuclear export mediator factor Nemf OS	0.893989	0.995422	1	0.684312	0.999526	1	-0.540605	1.0088	1	-0.886803	0.973322	1
>sp|Q8CFN2-2|CDC42_RAT Isoform 2 of Cell division control protein 42 homolog OS	1.18524	0.961115	1	0.132962	1.00427	1	-1.0088	0.992298	1	-0.435453	1.02191	1
>sp|Q8CFW7|C2D2A_MOUSE Coiled-coil and C2 domain-containing protein 2A OS	0.471916	1.03698	1	0.216874	1.01562	1	0.736723	1.01222	1	1.36972	0.820517	1
>sp|Q8CG45|ARK72_RAT Aflatoxin B1 aldehyde reductase member 2 OS	-0.193646	1.02267	2	1.03273	0.956152	2	0.937511	0.978676	2	0.0190453	1.00334	2
>sp|Q8CHM7|HACL1_RAT 2-hydroxyacyl-CoA lyase 1 OS	1.58853	0.824539	4	1.81899	0.665227	4	0.967939	0.982903	4	0.504456	1.0226	4
>sp|Q8CHN6|SGPL1_RAT Sphingosine-1-phosphate lyase 1 OS	-0.159787	1.02123	2	0.506602	1.01364	2	-0.256359	1.00544	2	-1.51765	0.746133	2
>sp|Q8CJ40|CROCC_MOUSE Rootletin OS	-0.0888589	1.00978	1	0.0460729	0.996056	1	0.0518787	0.99599	1	-0.131637	1.00617	1
>sp|Q8K0U4|HS12A_MOUSE Heat shock 70 kDa protein 12A OS	-1.02702	0.983395	1	-0.225915	1.01669	1	-0.839718	0.985096	1	-2.46916	0.224425	1
>sp|Q8K1Q0|NMT1_RAT Glycylpeptide N-tetradecanoyltransferase 1 OS	1.72748	0.768341	1	1.34157	0.857588	1	-0.364287	1.00748	1	-0.589665	1.01462	1
>sp|Q8K2C9|HACD3_MOUSE 3-hydroxyacyl-CoA dehydratase 3 OS	-0.382291	1.01709	1	-0.303143	1.01611	1	-0.219719	1.00166	1	-0.332584	1.01168	1
>sp|Q8K2X1|AT10D_MOUSE Probable phospholipid-transporting ATPase VD OS	0.942239	0.986896	1	-1.11409	0.938462	1	-0.793892	0.99246	1	1.77564	0.597515	1
>sp|Q8K442|ABC8A_MOUSE ATP-binding cassette sub-family A member 8-A OS	0.402781	1.03599	1	-0.722507	0.993508	1	-1.29815	0.999452	1	-0.435192	1.0222	1
>sp|Q8K4C0|FMO5_RAT Dimethylaniline monooxygenase [N-oxide-forming] 5 OS	0.757889	1.00932	4	0.138205	1.00843	4	-1.38205	1.01295	4	-2.59093	0.168963	4
>sp|Q8R1F5|HYI_MOUSE Putative hydroxypyruvate isomerase OS	1.05391	0.967611	1	-0.02318	0.997636	1	-0.131968	0.996771	1	1.16653	0.880367	1
>sp|Q8R431|MGLL_RAT Monoglyceride lipase OS	0.783563	1.01082	1	3.33929	0.0519509	1	0.908501	0.992005	1	-2.67402	0.148432	1
>sp|Q8R491|EHD3_RAT EH domain-containing protein 3 OS	0.973583	0.986021	2	0.790085	1.0159	2	-0.389657	1.01431	2	-0.960961	0.96571	2
>sp|Q8R4H7|NAGS_MOUSE N-acetylglutamate synthase, mitochondrial OS	-0.7873	1.01142	1	0.885726	0.983586	1	0.200699	1.00026	1	-2.17717	0.376819	1
>sp|Q8VBU2|NDRG2_RAT Protein NDRG2 OS	-0.246105	1.01328	3	0.158527	1.01014	3	0.986305	0.984666	3	1.52905	0.742873	3
>sp|Q8VC69|S22A6_MOUSE Solute carrier family 22 member 6 OS	-1.55187	0.849468	1	0.753864	1.01081	1	1.14407	1.03717	1	-1.44107	0.791186	1
>sp|Q8VDQ9|KRI1_MOUSE Protein KRI1 homolog OS	-0.444577	1.03632	1	-0.116319	0.997602	1	0.608777	1.01657	1	0.601821	1.02161	1
>sp|Q8VE38|OXND1_MOUSE Oxidoreductase NAD-binding domain-containing protein 1 OS	-1.38454	0.89247	1	-0.356052	1.01125	1	3.28643	0.0634561	1	4.28475	0.00135049	1
>sp|Q8VE97|SRSF4_MOUSE Serine/arginine-rich splicing factor 4 OS	-1.0198	0.981005	1	-0.689325	1.00408	1	-0.125441	0.99842	1	-0.451833	1.02208	1
>sp|Q8VED5|K2C79_MOUSE Keratin, type II cytoskeletal 79 OS				-2.35063	0.29808	1
>sp|Q8VHE9|RETST_RAT All-trans-retinol 13,14-reductase OS	3.00729	0.167683	8	2.98758	0.130445	8	-1.0238	0.988948	8	-6.43478	2.00809e-08	8
>sp|Q8VHF5|CISY_RAT Citrate synthase, mitochondrial OS	-0.071624	1.00617	8	1.23106	0.867997	8	1.48318	0.971568	8	0.492602	1.02288	8
>sp|Q8VHG2|AMOT_MOUSE Angiomotin OS	-0.959977	0.983259	1	0.899469	0.97967	1	0.954934	0.97909	1	-0.266672	1.00274	1
>sp|Q8VHV7|HNRH1_RAT Heterogeneous nuclear ribonucleoprotein H OS	-0.712824	1.01709	4	-1.19613	0.89342	4	-0.975902	0.976528	4	-0.777084	1.0112	4
>sp|Q8VID1|DHRS4_RAT Dehydrogenase/reductase SDR family member 4 OS	0.226196	1.01648	6	-0.12047	0.999249	6	-0.144006	0.999872	6	-0.421288	1.00815	6
>sp|Q8VIF7|SBP1_RAT Selenium-binding protein 1 OS	-0.284537	1.01463	8	-0.103648	0.996837	8	1.33126	1.00244	8	3.32342	0.0307246	8
>sp|Q91V33|KHDR1_RAT KH domain-containing, RNA-binding, signal transduction-associated protein 1 OS	0.738943	1.00894	2	0.124192	1.00129	2	-0.231953	1.00359	2	0.180796	1.00288	2
>sp|Q91V64|ISOC1_MOUSE Isochorismatase domain-containing protein 1 OS	-0.674971	1.02543	1	0.182706	1.0192	1	1.49123	0.986502	1	1.15093	0.883684	1
>sp|Q91ZA3|PCCA_MOUSE Propionyl-CoA carboxylase alpha chain, mitochondrial OS	0.846951	0.999505	1	1.69899	0.727638	1	0.533124	1.006	1	-0.81057	0.992976	1
>sp|Q91ZN1|COR1A_RAT Coronin-1A OS	0.464435	1.0355	2	-1.61144	0.767513	2	-1.09509	0.997029	2	1.16721	0.879364	2
>sp|Q91ZW1|TFAM_RAT Transcription factor A, mitochondrial OS	-1.5296	0.841115	3	-1.44815	0.849834	3	0.0386567	0.996749	3	0.980823	0.964596	3
>sp|Q920D2|DYR_RAT Dihydrofolate reductase OS	0.467133	1.03541	1	0.00508909	1.00013	1	-0.506985	1.00849	1	-0.281362	1.00331	1
>sp|Q920F5|DCMC_RAT Malonyl-CoA decarboxylase, mitochondrial OS	0.70304	1.01564	3	-0.109788	0.996733	3	-0.424928	1.02525	3	0.338948	1.01279	3
>sp|Q920L2|DHSA_RAT Succinate dehydrogenase [ubiquinone] flavoprotein subunit, mitochondrial OS	0.125302	1.01852	12	-0.425698	1.01216	12	-0.838364	0.986963	12	-1.32826	0.835093	12
>sp|Q920P0|DCXR_RAT L-xylulose reductase OS	-1.09627	0.946499	3	-0.44352	1.01184	3	0.205523	1.00238	3	0.0587314	1.00516	3
>sp|Q921M3|SF3B3_MOUSE Splicing factor 3B subunit 3 OS	1.79361	0.717473	1	1.56416	0.79311	1	0.725019	1.00619	1	0.91078	0.974429	1
>sp|Q923K9|A1CF_RAT APOBEC1 complementation factor OS	-2.70513	0.25096	1	-0.675582	0.999809	1	0.964707	0.978792	1	-0.590198	1.0174	1
>sp|Q924C3|ENPP1_RAT Ectonucleotide pyrophosphatase/phosphodiesterase family member 1 OS	1.15299	0.948633	2	0.333766	1.01015	2	-0.616456	1.02237	2	-0.275858	1.00082	2
>sp|Q924S5|LONM_RAT Lon protease homolog, mitochondrial OS	-0.145576	1.02277	5	1.12243	0.931777	5	0.683196	1.01519	5	-1.13043	0.89059	5
>sp|Q924X7|STK33_MOUSE Serine/threonine-protein kinase 33 OS	2.18149	0.554125	1	1.39204	0.844844	1	-0.403822	1.01731	1	-0.0919209	1.0074	1
>sp|Q924Z4|CERS2_MOUSE Ceramide synthase 2 OS	0.573272	1.01951	1	-0.414659	1.01063	1	-0.830309	0.980337	1	0.0801037	1.01018	1
>sp|Q99KP6|PRP19_MOUSE Pre-mRNA-processing factor 19 OS	1.76548	0.749463	1	-0.499586	1.01178	1	-1.33259	1.02067	1	0.956374	0.972343	1
>sp|Q99LB2|DHRS4_MOUSE Dehydrogenase/reductase SDR family member 4 OS	-0.0089043	1.00505	1	0.470543	1.01564	1	0.695202	1.01246	1	0.322152	1.01393	1
>sp|Q99LF4|RTCB_MOUSE tRNA-splicing ligase RtcB homolog OS	-0.82325	0.999623	6	-0.43903	1.00939	6	-0.589027	1.01209	6	-1.35461	0.826309	6
>sp|Q99M63|SMU1_RAT WD40 repeat-containing protein SMU1 OS	1.71909	0.757096	3	-0.474998	1.01348	3	-0.836256	0.980981	3	0.998873	0.954155	3
>sp|Q99ML5|PCYOX_RAT Prenylcysteine oxidase OS	0.510157	1.02838	1	1.13445	0.927561	1	0.741944	1.00936	1	-0.0106849	1.00196	1
>sp|Q99MR6|SRRT_MOUSE Serrate RNA effector molecule homolog OS	2.00785	0.636783	1	-0.363982	1.01143	1	-2.13576	0.559671	1	-0.326968	1.01407	1
>sp|Q99MS0|S14L2_RAT SEC14-like protein 2 OS	-0.804021	1.00718	3	0.27328	1.01498	3	0.952183	0.977906	3	0.169356	1.004	3
>sp|Q99MZ8|LASP1_RAT LIM and SH3 domain protein 1 OS	-0.389897	1.026	4	-1.17359	0.900755	4	-0.39583	1.01129	4	1.29992	0.863874	4
>sp|Q99N48|SYTL3_MOUSE Synaptotagmin-like protein 3 OS	-0.0937784	1.0142	1	0.106199	0.997884	1	0.156408	0.999233	1	-0.0426536	1.00561	1
>sp|Q99NA5|IDH3A_RAT Isocitrate dehydrogenase [NAD] subunit alpha, mitochondrial OS	0.307855	1.00889	1	0.754515	1.00993	1	0.685339	1.01626	1	0.249771	1.00438	1
>sp|Q99NB9|SF3B1_MOUSE Splicing factor 3B subunit 1 OS	1.94492	0.663962	3	-0.255979	1.01493	3	-1.12529	1.02053	3	0.643763	1.01204	3
>sp|Q99P63|EFHA1_RAT EF-hand domain-containing family member A1 OS	0.158898	1.01989	1	-0.420904	1.01286	1	-0.357999	1.00625	1	0.18717	1.00793	1
>sp|Q99PL5|RRBP1_MOUSE Ribosome-binding protein 1 OS	0.537543	1.02339	1	-0.215234	1.01495	1	-0.0953712	0.988458	1	0.843591	0.980045	1
>sp|Q99PS8|HRG_RAT Histidine-rich glycoprotein OS	-2.33954	0.449788	1	-1.7714	0.698066	1	-0.292708	1.00774	1	-0.691075	1.02578	1
>sp|Q99PT1|GDIR1_MOUSE Rho GDP-dissociation inhibitor 1 OS	0.9107	0.98927	1	1.13034	0.933807	1	-0.0771798	0.991533	1	-0.684764	1.02354	1
>sp|Q99PV0|PRP8_MOUSE Pre-mRNA-processing-splicing factor 8 OS	2.24981	0.49949	6	0.15954	1.01062	6	-1.0604	1.01043	6	0.269394	1.00243	6
>sp|Q9CPY0|RRMJ2_MOUSE Putative ribosomal RNA methyltransferase 2 OS	0.180279	1.02337	1	0.501575	1.00948	1	0.673673	1.01099	1	0.500946	1.02357	1
>sp|Q9CQ62|DECR_MOUSE 2,4-dienoyl-CoA reductase, mitochondrial OS	1.90756	0.657508	3	2.67422	0.189529	3	1.20217	1.03278	3	-0.434566	1.02	3
>sp|Q9CQF3|CPSF5_MOUSE Cleavage and polyadenylation specificity factor subunit 5 OS	-0.209981	1.0169	1	-0.857738	0.986453	1	-1.35698	1.0114	1	-1.14109	0.886499	1
>sp|Q9CQM5|TXD17_MOUSE Thioredoxin domain-containing protein 17 OS	1.43658	0.878473	1	0.740259	1.001	1	0.422079	1.02361	1	1.31817	0.843253	1
>sp|Q9CQU3|RER1_MOUSE Protein RER1 OS	2.02356	0.629628	1	0.614244	1.00359	1	-0.382313	1.00868	1	0.816484	0.990719	1
>sp|Q9CW42|MOSC1_MOUSE MOSC domain-containing protein 1, mitochondrial OS	1.89101	0.6687	1	-0.4518	1.01479	1	-1.17842	1.03194	1	0.682338	1.0241	1
>sp|Q9CXB8|ALPK1_MOUSE Alpha-protein kinase 1 OS	0.384054	1.02056	1	-0.250686	1.01703	1	-0.979357	0.976804	1	-0.726067	1.01974	1
>sp|Q9D0M5|DYL2_MOUSE Dynein light chain 2, cytoplasmic OS	-2.15008	0.573426	1	-2.15539	0.419273	1	-1.61443	0.930437	1	-2.04947	0.452663	1
>sp|Q9D0T1|NH2L1_MOUSE NHP2-like protein 1 OS	-0.250181	1.01317	4	-0.428086	1.01136	4	-0.12284	0.997303	4	0.280759	1.00152	4
>sp|Q9D1F5|CE045_MOUSE UPF0544 protein C5orf45 homolog OS	-0.559358	1.01879	1	-0.0246143	0.996473	1	0.291127	1.00769	1	-0.181732	1.0042	1
>sp|Q9D554|SF3A3_MOUSE Splicing factor 3A subunit 3 OS	1.74866	0.750832	2	-0.329176	1.01157	2	-1.71868	0.865244	2	-0.44131	1.02706	2
>sp|Q9D6L8|PPIL3_MOUSE Peptidyl-prolyl cis-trans isomerase-like 3 OS	-1.37933	0.886669	1	-1.63558	0.756528	1	-1.44524	0.980822	1	-1.57502	0.7063	1
>sp|Q9D7B6|ACAD8_MOUSE Isobutyryl-CoA dehydrogenase, mitochondrial OS	-1.66287	0.796719	5	-1.67596	0.738464	5	-1.44556	0.980228	5	-0.248555	1.00556	5
>sp|Q9D880|TIM50_MOUSE Mitochondrial import inner membrane translocase subunit TIM50 OS	-0.645687	1.0197	2	-0.482474	1.01175	2	0.456895	1.01959	2	0.918403	0.973334	2
>sp|Q9D883|U2AF1_MOUSE Splicing factor U2AF 35 kDa subunit OS	0.802447	1.00645	1	-0.624999	1.00497	1	-0.334352	1.00601	1	1.6347	0.674103	1
>sp|Q9DAI6|F135B_MOUSE Protein FAM135B OS	4.89393	0.00163485	1	0.157346	1.00982	1	-2.30428	0.465976	1	-0.650535	1.01322	1
>sp|Q9DAU9|ZN654_MOUSE Zinc finger protein 654 OS	-1.18012	0.962277	1	-0.0251817	0.997227	1	0.718978	1.00883	1	-0.426854	1.01328	1
>sp|Q9DBB4|NAA16_MOUSE N-alpha-acetyltransferase 16, NatA auxiliary subunit OS	0.159524	1.02147	1	-0.930099	0.972518	1	-0.0529703	0.996998	1	1.71187	0.624594	1
>sp|Q9DBL2|GDAP2_MOUSE Ganglioside-induced differentiation-associated protein 2 OS	1.3938	0.891841	1	-0.824364	0.994554	1	-2.80031	0.188667	1	-1.46365	0.775678	1
>sp|Q9DBM2|ECHP_MOUSE Peroxisomal bifunctional enzyme OS	2.94454	0.184473	1	2.59514	0.219307	1	0.790201	0.988982	1	0.868707	0.973912	1
>sp|Q9EPB4|ASC_MOUSE Apoptosis-associated speck-like protein containing a CARD OS	1.32287	0.917741	1	-0.404188	1.01934	1	-1.0508	1.01271	1	0.678863	1.02085	1
>sp|Q9EPH8|PABP1_RAT Polyadenylate-binding protein 1 OS	-0.8377	0.998855	5	-1.51357	0.804902	5	-1.97998	0.662988	5	-2.50178	0.211239	5
>sp|Q9EQ10|PR1BP_RAT PARP1-binding protein OS	-0.117644	1.01428	1	0.95209	0.983687	1	1.04288	1.00401	1	-0.0333139	1.00499	1
>sp|Q9EQ76|FMO3_RAT Dimethylaniline monooxygenase [N-oxide-forming] 3 OS	0.0240178	1.00702	12	1.71631	0.733643	12	0.676798	1.01454	12	-2.68818	0.153515	12
>sp|Q9EQS0|TALDO_RAT Transaldolase OS	-0.479691	1.03101	2	0.0498293	0.996044	2	0.605788	1.00982	2	0.266615	1.0028	2
>sp|Q9EQX9|UBE2N_RAT Ubiquitin-conjugating enzyme E2 N OS	1.89239	0.666613	1	1.58486	0.78301	1	-0.339173	1.01209	1	-0.732329	1.02236	1
>sp|Q9ER34|ACON_RAT Aconitate hydratase, mitochondrial OS	0.422109	1.03926	4	1.28818	0.859719	4	1.03761	0.999813	4	-0.0371839	1.00628	4
>sp|Q9ER60|SCN4A_MOUSE Sodium channel protein type 4 subunit alpha OS	2.16229	0.556106	1	0.865316	0.992419	1	0.398557	1.01657	1	1.98695	0.482353	1
>sp|Q9ES21|SAC1_RAT Phosphatidylinositide phosphatase SAC1 OS	0.373973	1.01713	1	0.049145	0.99661	1	-0.0633214	0.994784	1	0.303187	1.00903	1
>sp|Q9ES38|S27A5_RAT Bile acyl-CoA synthetase OS	0.0643091	1.00654	16	-2.29111	0.330343	16	-2.2331	0.525714	16	-0.313257	1.00627	16
>sp|Q9ESV6|G3PT_RAT Glyceraldehyde-3-phosphate dehydrogenase, testis-specific OS	-0.658035	1.02227	2	-1.01602	0.952229	2	0.00595284	1.00141	2	1.22017	0.864067	2
>sp|Q9ESW0|DDB1_RAT DNA damage-binding protein 1 OS	0.123922	1.01766	1	-0.509047	1.01382	1	0.944607	0.978605	1	2.02768	0.467374	1
>sp|Q9JHL4|DBNL_RAT Drebrin-like protein OS	-0.139985	1.02074	1	0.397288	1.01784	1	0.0601021	0.995545	1	-0.719597	1.02565	1
>sp|Q9JHZ9|S38A3_RAT Sodium-coupled neutral amino acid transporter 3 OS	1.204	0.962053	1	0.566978	1.00966	1	-0.682509	1.01608	1	-0.508303	1.02441	1
>sp|Q9JJ19|NHRF1_RAT Na(+)/H(+) exchange regulatory cofactor NHE-RF1 OS	0.517228	1.02738	2	0.981476	0.968059	2	1.10149	1.00029	2	0.852963	0.982082	2
>sp|Q9JJ46|EBP_RAT 3-beta-hydroxysteroid-Delta(8),Delta(7)-isomerase OS	0.327451	1.02541	1	-0.360976	1.01118	1	-0.242344	1.00585	1	0.622843	1.01431	1
>sp|Q9JJ54|HNRPD_RAT Heterogeneous nuclear ribonucleoprotein D0 OS	0.77146	1.01178	1	-1.18284	0.897003	1	-1.77942	0.804138	1	0.032167	1.00401	1
>sp|Q9JK15|ADAP2_RAT Arf-GAP with dual PH domain-containing protein 2 OS	-0.106022	1.01226	1	-0.489445	1.01357	1	0.665063	1.00954	1	1.43299	0.787921	1
>sp|Q9JK72|CCS_RAT Copper chaperone for superoxide dismutase OS	0.72953	1.01213	1	-0.588851	1.00809	1	-0.869683	0.997056	1	0.488915	1.02406	1
>sp|Q9JL04|FMN2_MOUSE Formin-2 OS	-0.215851	1.01883	1	-0.365929	1.01452	1	-0.895493	0.989279	1	-1.22684	0.866716	1
>sp|Q9JLH7|CK5P3_RAT CDK5 regulatory subunit-associated protein 3 OS	0.160816	1.02245	2	-0.382535	1.01687	2	-0.251436	1.00478	2	0.51294	1.02532	2
>sp|Q9JLJ2|AL9A1_MOUSE 4-trimethylaminobutyraldehyde dehydrogenase OS	-3.03309	0.153992	1	1.47094	0.828002	1	2.34941	0.424638	1	-2.92469	0.0933264	1
>sp|Q9JLJ3|AL9A1_RAT 4-trimethylaminobutyraldehyde dehydrogenase OS	-0.966555	0.985802	9	-0.0791398	0.994065	9	1.10264	1.0053	9	1.61622	0.680706	9
>sp|Q9JLT0|MYH10_RAT Myosin-10 OS	0.663964	1.01959	2	-0.557367	1.00737	2	-0.144927	1.00114	2	1.2431	0.870326	2
>sp|Q9JM53|AIFM1_RAT Apoptosis-inducing factor 1, mitochondrial OS	-0.319206	1.01873	20	0.757577	1.01536	20	1.11454	1.01643	20	0.871946	0.973988	20
>sp|Q9JMG1|EDF1_MOUSE Endothelial differentiation-related factor 1 OS	-0.847607	1.00163	1	-0.318582	1.01177	1	0.402147	1.01452	1	0.0814416	1.01104	1
>sp|Q9QWN8|SPTN2_RAT Spectrin beta chain, brain 2 OS	0.183612	1.02246	6	-0.448717	1.01541	6	-0.468701	1.01809	6	0.0663568	1.00858	6
>sp|Q9QXQ0|ACTN4_RAT Alpha-actinin-4 OS	0.431485	1.03841	16	-0.441778	1.0082	16	0.41675	1.01811	16	2.2203	0.342973	16
>sp|Q9QY17|PACN2_RAT Protein kinase C and casein kinase substrate in neurons 2 protein OS	0.278387	1.01199	1	-0.157853	1.00936	1	-0.166857	1.00108	1	0.317818	1.01247	1
>sp|Q9QY30|ABCBB_MOUSE Bile salt export pump OS	-0.23844	1.01458	1	0.340915	1.01189	1	0.436072	1.02344	1	-0.0846126	1.01033	1
>sp|Q9QZ86|NOP58_RAT Nucleolar protein 58 OS	-0.218013	1.01675	6	-0.482068	1.01222	6	-0.376616	1.00763	6	-0.290728	1.00605	6
>sp|Q9QZH8|AAAD_RAT Arylacetamide deacetylase OS	0.38919	1.02677	1	0.111266	0.99741	1	0.389212	1.01479	1	0.95631	0.967308	1
>sp|Q9R063|PRDX5_RAT Peroxiredoxin-5, mitochondrial OS	0.842887	1.00065	8	2.51163	0.236112	8	2.06257	0.606328	8	0.387799	1.00338	8
>sp|Q9R099|TBL2_MOUSE Transducin beta-like protein 2 OS	0.276853	1.01193	1	0.692964	1.00309	1	0.138786	0.999669	1	-0.578896	1.01868	1
>sp|Q9R0T3|DNJC3_RAT DnaJ homolog subfamily C member 3 OS	-1.18995	0.960654	7	0.64277	1.00698	7	0.0662104	0.992374	7	-2.8888	0.0996857	7
>sp|Q9R1T1|BAF_RAT Barrier-to-autointegration factor OS	0.83055	0.998366	1	-0.0823083	0.997093	1	-0.610554	1.01788	1	0.0545235	1.00673	1
>sp|Q9R1Z0|VDAC3_RAT Voltage-dependent anion-selective channel protein 3 OS	1.69798	0.763151	5	0.377347	1.01365	5	-0.986763	0.983984	5	-1.26215	0.870453	5
>sp|Q9WTP0|E41L1_RAT Band 4.1-like protein 1 OS	-0.764176	1.01049	1	-0.859225	0.991874	1	-0.119436	0.994873	1	0.234499	1.00372	1
>sp|Q9WTT6|GUAD_RAT Guanine deaminase OS	0.425489	1.03934	2	1.34674	0.869488	2	0.762967	0.999111	2	-0.592843	1.01644	2
>sp|Q9WUL0|TOP1_RAT DNA topoisomerase 1 OS	-0.0024896	1.00225	1	-0.310482	1.01433	1	-0.110575	0.991201	1	0.329102	1.01357	1
>sp|Q9WUM4|COR1C_MOUSE Coronin-1C OS	-0.380453	1.01639	1	-0.110134	0.998392	1	-0.485966	1.0084	1	-1.20527	0.863481	1
>sp|Q9WUM5|SUCA_MOUSE Succinyl-CoA ligase [ADP/GDP-forming] subunit alpha, mitochondrial OS	2.75035	0.23444	1	3.17255	0.0841162	1	1.18166	1.03463	1	0.278867	1.00181	1
>sp|Q9WUS0|KAD4_RAT Adenylate kinase isoenzyme 4, mitochondrial OS	-0.571955	1.01779	5	-1.05323	0.955055	5	-0.411536	1.01633	5	0.631381	1.01436	5
>sp|Q9WUW9|S1C2A_RAT Sulfotransferase 1C2A OS	0.965505	0.982093	1	2.56509	0.21805	1	1.02059	0.989919	1	-1.36677	0.820108	1
>sp|Q9WV97|TIM9_RAT Mitochondrial import inner membrane translocase subunit Tim9 OS	0.0875306	1.0096	1	0.129448	1.00133	1	0.23968	1.00611	1	0.280719	1.00156	1
>sp|Q9WVA1|TIM8A_RAT Mitochondrial import inner membrane translocase subunit Tim8 A OS	-1.00271	0.978772	1	-0.516595	1.01007	1	1.04067	0.995057	1	1.26069	0.865947	1
>sp|Q9WVB3|TLE6_MOUSE Transducin-like enhancer protein 6 OS	-1.00433	0.981871	1	-1.63823	0.752418	1	0.300864	1.00851	1	1.91393	0.522208	1
>sp|Q9WVJ4|SYJ2B_RAT Synaptojanin-2-binding protein OS	1.16926	0.956469	1	0.346892	1.01238	1	-1.58378	0.939461	1	-1.69358	0.64351	1
>sp|Q9WVK3|PECR_RAT Peroxisomal trans-2-enoyl-CoA reductase OS	-2.31543	0.460204	11	-1.44388	0.847955	11	0.841138	0.987617	11	2.12468	0.721609	11
>sp|Q9WVK7|HCDH_RAT Hydroxyacyl-coenzyme A dehydrogenase, mitochondrial OS	-0.545104	1.01863	17	0.933753	0.967305	17	1.29014	1.00415	17	0.00886251	1.00343	17
>sp|Q9WVR1|INP5E_RAT 72 kDa inositol polyphosphate 5-phosphatase OS	0.783104	1.01145	1	0.201421	1.02067	1	-0.227065	1.00371	1	0.173432	1.00459	1
>sp|Q9Z0J5|TRXR2_RAT Thioredoxin reductase 2, mitochondrial OS	-1.14229	0.937389	3	0.605302	1.00565	3	1.29998	1.00576	3	-0.0656449	1.0072	3
>sp|Q9Z0U4|GABR1_RAT Gamma-aminobutyric acid type B receptor subunit 1 OS	1.21891	0.952555	1	0.77094	1.01243	1	0.242157	1.00603	1	0.666848	1.01599	1
>sp|Q9Z0U5|ADO_RAT Aldehyde oxidase OS	-1.73911	0.766398	2	-0.132075	1.00304	2	0.697723	1.01698	2	-0.908318	0.974695	2
>sp|Q9Z0V5|PRDX4_RAT Peroxiredoxin-4 OS	0.243422	1.01205	2	1.56636	0.796066	2	1.9975	0.652839	2	1.01581	0.940163	2
>sp|Q9Z0V6|PRDX3_RAT Thioredoxin-dependent peroxide reductase, mitochondrial OS	0.149259	1.02155	1	0.172234	1.01452	1	1.13222	1.01642	1	1.75508	0.607052	1
>sp|Q9Z142|TMM33_RAT Transmembrane protein 33 OS	0.63161	1.02192	1	0.352809	1.01211	1	0.288061	1.00833	1	0.632028	1.01716	1
>sp|Q9Z1A6|VIGLN_RAT Vigilin OS	-1.32644	0.917361	39	-0.116282	0.997634	39	0.0746182	0.996699	39	-1.24994	0.866633	39
>sp|Q9Z1C8|RPGF3_RAT Rap guanine nucleotide exchange factor 3 OS	-0.458983	1.03475	1	0.289586	1.01693	1	0.284502	1.00945	1	-0.458404	1.02959	1
>sp|Q9Z1N5|DX39B_MOUSE Spliceosome RNA helicase Ddx39b OS	-1.44927	0.879314	2	-1.31349	0.864815	2	0.0154058	1.00001	2	0.58051	1.01671	2
>sp|Q9Z1P2|ACTN1_RAT Alpha-actinin-1 OS	-0.273034	1.01335	15	-0.056321	0.995627	15	0.554503	1.01164	15	1.19043	0.857377	15
>sp|Q9Z1W6|LYRIC_RAT Protein LYRIC OS	-1.38817	0.901149	3	-0.951442	0.984635	3	-1.25334	1.02889	3	-2.61871	0.164757	3
>sp|Q9Z1Y3|CADH2_RAT Cadherin-2 OS	0.16719	1.02602	1	2.01466	0.516756	1	0.978172	0.978551	1	-0.893479	0.968666	1
>sp|Q9Z270|VAPA_RAT Vesicle-associated membrane protein-associated protein A OS	-0.856071	1.00201	1	-0.92984	0.968087	1	-0.344797	1.00882	1	-0.181305	1.00459	1
>sp|Q9Z2G6|SE1L1_MOUSE Protein sel-1 homolog 1 OS	0.258286	1.01144	1	0.4741	1.0145	1	0.368448	1.00922	1	0.120941	1.00663	1
>sp|Q9Z2I8|SUCB2_MOUSE Succinyl-CoA ligase [GDP-forming] subunit beta, mitochondrial OS	-1.67207	0.781595	1	-1.21492	0.885912	1	2.10448	0.586298	1	3.42019	0.0247866	1
>sp|Q9Z2M4|DECR2_RAT Peroxisomal 2,4-dienoyl-CoA reductase OS	-0.111171	1.01658	8	0.165973	1.01247	8	0.508161	1.00918	8	0.76016	1.01992	8
>sp|Q9Z2Y0|KEG1_RAT Glycine N-acyltransferase-like protein Keg1 OS	1.00923	0.974536	1	-0.0671431	0.995968	1	-0.667653	1.00995	1	0.218051	1.00575	1
>sp|Q9Z311|MECR_RAT Trans-2-enoyl-CoA reductase, mitochondrial OS	-2.00159	0.630027	1	-0.512598	1.01271	1	0.52691	1.00909	1	-0.979673	0.96103	1
>sp|Q9Z339|GSTO1_RAT Glutathione S-transferase omega-1 OS	-0.15042	1.02264	1	-0.426683	1.01107	1	-0.055439	0.996226	1	0.405973	1.00638	1
>tr|A0JN30|A0JN30_RAT Canopy 2 homolog (Zebrafish) OS	-0.579305	1.0177	1	1.33795	0.858302	1	0.51863	1.00629	1	-1.31815	0.843274	1
>tr|A0JPJ0|A0JPJ0_RAT Nicotinamide nucleotide adenylyltransferase 1 OS	0.58033	1.02205	1	0.00182433	0.999742	1	0.27113	1.00749	1	1.17404	0.875274	1
>tr|A1A5Q1|A1A5Q1_RAT Parp9 protein OS	0.400056	1.03336	1	0.0451618	0.995574	1	-0.0406166	0.997034	1	0.268897	1.00292	1
>tr|A1JVI9|A1JVI9_MOUSE Homeobox protein OS	-0.724051	1.01542	1	0.13103	1.00195	1	1.49727	0.988279	1	1.20748	0.870393	1
>tr|A1Z0K8|A1Z0K8_RAT Beta-actin (Fragment) OS	-0.367114	1.01565	6	-0.0923256	0.998164	6	0.377389	1.0116	6	1.17193	1.00516	6
>tr|A2AAB8|A2AAB8_MOUSE Kruppel-like factor 7 (Ubiquitous) OS	-0.017895	1.00579	1	-1.12683	0.929104	1	-2.44158	0.360263	1	-2.11155	0.424008	1
>tr|A2AJY4|A2AJY4_MOUSE Procollagen type XV (Fragment) OS	-0.130977	1.01971	1	0.603568	1.00778	1	0.931493	0.980616	1	0.331209	1.0131	1
>tr|A6J2H6|A6J2H6_RAT Similar to Kelch-like protein 14 (Predicted) OS	-1.80171	0.735479	1	-1.50544	0.805803	1	0.793815	0.992563	1	1.43173	0.789803	1
>tr|A8DUK4|A8DUK4_MOUSE Beta-globin OS	-0.86003	1.00418	1	-2.55945	0.221622	2	-0.36522	1.00999	1	4.39541	0.000945039	1
>tr|A9UMW2|A9UMW2_RAT Ndufa3 protein (Fragment) OS	1.11832	0.947207	1	0.158826	1.00987	1	-0.46221	1.0195	1	0.346365	1.01284	1
>tr|B0BN38|B0BN38_RAT Lgi3 protein OS	-0.825751	1.00059	1	-0.578295	1.01001	1	0.008907	1.0009	1	-0.115445	1.00391	1
>tr|B0BN46|B0BN46_RAT Grhpr protein OS	0.480788	1.03279	8	0.226094	1.01879	8	0.0465449	0.995319	8	-0.0359298	1.00731	8
>tr|B0BN51|B0BN51_RAT RCG26118, isoform CRA_a OS	-0.596011	1.02086	2	-1.34559	0.86373	2	-1.62023	0.919496	2	-1.45128	0.783687	2
>tr|B0BN52|B0BN52_RAT Mitochondrial carrier homolog 2 (C. elegans) OS	2.04222	0.618438	10	0.381832	1.01498	10	-0.57265	1.01738	10	-0.310401	1.00669	10
>tr|B0BN81|B0BN81_RAT Ribosomal protein S5, isoform CRA_b OS	1.45412	0.871261	1	-0.321505	1.01205	1	-1.11937	1.00851	1	0.50097	1.02354	1
>tr|B0BND9|B0BND9_RAT Srp72 protein OS	-0.579341	1.01989	2	0.198399	1.01835	2	0.116414	0.993475	2	-0.737258	1.02269	2
>tr|B0BNE6|B0BNE6_RAT NADH dehydrogenase (Ubiquinone) Fe-S protein 8 (Predicted), isoform CRA_a OS	0.632972	1.0202	3	0.594557	1.00773	3	0.47446	1.01453	3	0.450698	1.02337	3
>tr|B0BNF9|B0BNF9_RAT Hydroxyacid oxidase 1 OS	0.110355	1.01593	5	0.526314	1.01707	5	0.946875	0.980455	5	1.20933	0.867679	5
>tr|B0BNG3|B0BNG3_RAT Lman2 protein OS	1.29867	0.927657	4	0.138928	1.00779	4	0.038076	0.997226	4	1.50703	0.745811	4
>tr|B0BNJ4|B0BNJ4_RAT Ethylmalonic encephalopathy 1 OS	0.332773	1.02413	2	0.178862	1.01339	2	-0.143805	1.00005	2	-0.189514	1.00796	2
>tr|B0BNK2|B0BNK2_RAT Putative uncharacterized protein RGD1563941 OS	-0.102918	1.01161	1	0.383085	1.01628	1	-0.855153	0.997109	1	-2.2585	0.323643	1
>tr|B0K010|B0K010_RAT Thioredoxin domain containing 17 OS	0.897293	0.998784	1	1.2772	0.865181	1	0.821765	0.987634	1	0.386468	1.0048	1
>tr|B0K030|B0K030_RAT DnaJ (Hsp40) homolog, subfamily B, member 1 (Predicted), isoform CRA_b OS	-0.28194	1.01243	1	-0.498988	1.0095	1	-0.709302	1.01362	1	-0.735498	1.02227	1
>tr|B0K031|B0K031_RAT RCG30479, isoform CRA_b OS	-1.16021	0.950513	1	-2.86499	0.151397	1	-2.77062	0.17838	1	-1.36868	0.822091	1
>tr|B1H227|B1H227_RAT LOC682908 protein OS	2.39686	0.402224	2	0.505577	1.01182	2	-0.679447	1.01366	2	0.805921	0.999338	2
>tr|B1H250|B1H250_RAT RGD1564894 protein OS	1.17112	0.953511	8	2.32044	0.323137	8	1.59231	0.937817	8	-0.164407	1.0035	8
>tr|B1H270|B1H270_RAT RCG56440 OS	-1.31747	0.918422	15	0.18228	1.01742	15	1.90412	0.728438	15	3.05097	0.464383	15
>tr|B1H2A4|B1H2A4_RAT Pnpt1 protein (Fragment) OS	0.0710298	1.00667	1	0.113424	0.996843	1	0.382399	1.01127	1	0.512006	1.02323	1
>tr|B1WBL4|B1WBL4_RAT Uncharacterized protein OS	-0.310078	1.01234	1	-0.289825	1.01669	1	0.027249	0.998526	1	0.102244	1.00794	1
>tr|B1WBP7|B1WBP7_RAT Putative uncharacterized protein OS	-2.8409	0.232525	1	1.55349	0.80044	1	2.47252	0.346276	1	-0.558566	1.0265	1
>tr|B1WBY7|B1WBY7_RAT ER lipid raft associated 1 OS	1.15223	0.94982	1	0.330177	1.01219	1	-0.714618	1.0106	1	-0.213384	1.00267	1
>tr|B1WC16|B1WC16_RAT BCL2-associated transcription factor 1, isoform CRA_a OS	0.623741	1.02233	1	0.378036	1.01554	1	0.422816	1.02568	1	0.85144	0.979677	1
>tr|B1WC49|B1WC49_RAT Api5 protein OS	-1.12227	0.947332	4	-1.18206	0.898174	4	-0.541856	1.01266	4	0.512696	1.02561	4
>tr|B1WC50|B1WC50_RAT Ewsr1 protein OS	0.443435	1.03466	1	-0.202946	1.02145	1	0.637403	1.02012	1	1.97452	0.487434	1
>tr|B1WC56|B1WC56_RAT Nola2 protein OS	-0.362613	1.01519	1	1.00007	0.963366	1	0.847833	0.993465	1	-0.468888	1.02365	1
>tr|B1WC61|B1WC61_RAT Acad9 protein OS	1.67955	0.769471	4	1.19507	0.895006	4	-0.536312	1.00541	4	-1.71257	0.629232	4
>tr|B2GV09|B2GV09_RAT Llgl2 protein OS	0.0247354	1.00643	2	0.053171	0.995137	2	-0.311561	1.00758	2	-0.653262	1.01715	2
>tr|B2GV15|B2GV15_RAT Dihydrolipoamide branched chain transacylase E2 OS	-1.70943	0.760586	2	-0.974699	0.972818	2	0.418108	1.02229	2	0.468955	1.02559	2
>tr|B2GV19|B2GV19_RAT Anks4b protein OS	-0.074953	1.00594	1	0.726216	0.996262	1	0.794927	0.99106	1	-0.0176509	1.00321	1
>tr|B2RQ28|B2RQ28_MOUSE RIKEN cDNA 1700024P16 gene OS	-0.593579	1.02388	1	-0.207097	1.01973	1	0.0807058	0.992439	1	-0.348417	1.0133	1
>tr|B2RQY6|B2RQY6_MOUSE BC035947 protein OS	0.253939	1.01414	1	0.533214	1.01203	1	-0.666385	1.01157	1	-1.75825	0.611562	1
>tr|B2RYB3|B2RYB3_RAT Srrm1 protein OS	2.30236	0.463879	1	1.1935	0.891208	1	-0.282065	1.00705	1	0.49048	1.02535	1
>tr|B2RYD7|B2RYD7_RAT RCG25591, isoform CRA_a OS	0.679198	1.02373	1	0.337281	1.01399	1	-0.37704	1.00718	1	-0.315702	1.0096	1
>tr|B2RYG0|B2RYG0_RAT Coro1c protein OS	-1.24866	0.936622	2	-0.509603	1.01317	2	0.97229	0.981849	2	1.13853	0.884521	2
>tr|B2RYI2|B2RYI2_RAT Signal recognition particle 68 OS	0.932355	0.982753	1	0.133457	1.00383	1	-0.851515	0.997558	1	-0.432501	1.01272	1
>tr|B2RYJ9|B2RYJ9_RAT Eps8l2 protein OS	-0.814414	1.00598	1	-0.505818	1.01154	1	0.550008	1.01158	1	0.65504	1.01861	1
>tr|B2RYS2|B2RYS2_RAT RCG60159 OS	-1.19874	0.963277	1	0.141325	1.01044	1	0.612438	1.01908	1	-0.913467	0.975472	1
>tr|B2RYT7|B2RYT7_RAT Haloacid dehalogenase-like hydrolase domain containing 3 OS	-0.0183361	1.0073	4	0.525822	1.01455	4	0.631291	1.02177	4	0.226657	1.00665	4
>tr|B2RYV2|B2RYV2_RAT Nudt16 protein OS	0.935272	0.98689	1	0.944106	0.97851	1	-0.586578	1.01509	1	-1.28036	0.861057	1
>tr|B2RYW3|B2RYW3_RAT NADH dehydrogenase (Ubiquinone) 1 beta subcomplex, 9 OS	-0.57985	1.02263	1	-0.201167	1.01869	1	-0.105739	0.992054	1	-0.67117	1.01801	1
>tr|B2RYX1|B2RYX1_RAT LOC685322 protein OS	1.36412	0.886224	1	0.750633	1.00438	1	0.0145673	0.99882	1	0.124962	1.00585	1
>tr|B2RZ74|B2RZ74_RAT Snrp70 protein OS	0.118238	1.01788	1	-1.04805	0.957217	1	-1.042	1.00538	1	0.192426	1.0082	1
>tr|B2RZD1|B2RZD1_RAT Sec61 beta subunit OS	0.801191	1.00818	1	0.138646	1.00804	1	-1.03341	0.992095	1	-0.922586	0.972278	1
>tr|B2RZD4|B2RZD4_RAT RCG28883, isoform CRA_b OS	-3.48304	0.0819994	3	-2.79989	0.174224	3	-0.841884	0.989589	3	-0.708176	1.0232	3
>tr|B3KY79|B3KY79_HUMAN cDNA FLJ46620 fis, clone TLUNG2000654, highly similar to Keratin, type II cytoskeletal 7 OS	3.46338	0.0882308	1	2.64738	0.205251	1	0.515604	1.00671	1	1.0581	0.92348	1
>tr|B4F768|B4F768_RAT Aldh4a1 protein (Fragment) OS	-0.0735655	1.00582	1	0.792103	1.01312	1	0.927019	0.982028	1	0.0833599	1.01141	1
>tr|B4F7C7|B4F7C7_RAT Hebp1 protein OS	-0.170075	1.02554	1	-0.456468	1.01239	1	0.862404	1.00261	1	1.88602	0.544015	1
>tr|B5DEG1|B5DEG1_RAT RGD1564327 protein OS	0.838691	1.00198	1	0.995345	0.965061	1	1.33654	1.01344	1	1.61437	0.675273	1
>tr|B5DEL0|B5DEL0_RAT Similar to bA392M18.1 (Novel protein similar to testis specific protein TSPY) (Predicted) OS	-0.0162526	1.00713	1	0.382124	1.01467	1	0.816214	0.99085	1	0.673235	1.01917	1
>tr|B5DEN5|B5DEN5_RAT Eukaryotic translation elongation factor 1 beta 2 OS	-0.238545	1.01448	2	0.347768	1.014	2	-0.6536	1.01303	2	-2.34553	0.285701	2
>tr|B5DEQ4|B5DEQ4_RAT RCG27500, isoform CRA_c OS	0.0549803	1.00475	3	-0.895583	0.980497	3	-1.1279	1.01619	3	-0.485133	1.01817	3
>tr|B5DEZ4|B5DEZ4_RAT Tcerg1 protein OS	0.560438	1.02076	1	-0.143443	1.0106	1	-0.410278	1.01584	1	0.281158	1.00351	1
>tr|B5DF03|B5DF03_RAT Fkbp3 protein (Fragment) OS	0.00816911	1.00564	3	-0.101426	0.997456	3	-0.607122	1.01164	3	-1.1089	0.903071	3
>tr|B5DF12|B5DF12_RAT Sf3b3 protein (Fragment) OS	0.4478	1.03859	3	-0.629114	1.00556	3	-1.37028	0.997813	3	-0.876983	0.976184	3
>tr|B5DF65|B5DF65_RAT Biliverdin reductase B (Flavin reductase (NADPH)) OS	0.465429	1.03739	4	0.396776	1.01571	4	0.326672	1.00885	4	0.569247	1.0214	4
>tr|B5DFA3|B5DFA3_RAT Bucs1 protein OS	-0.110623	1.0157	10	0.855219	0.986984	10	0.857303	0.99877	10	-0.433103	1.01491	10
>tr|B5DFC1|B5DFC1_RAT Vps35 protein (Fragment) OS	1.00221	0.979518	2	1.26984	0.871908	2	-0.247611	1.00616	2	-1.55061	0.7332	2
>tr|B5DFH4|B5DFH4_RAT Papss2 protein OS	1.43264	0.875762	1	3.73805	0.022122	1	2.17353	0.543354	1	-0.834113	0.98418	1
>tr|B5DFJ3|B5DFJ3_RAT Ddx23 protein (Fragment) OS	0.741306	1.0058	2	0.0573797	0.994747	2	0.233989	1.00545	2	1.06672	0.923698	2
>tr|B5DFK1|B5DFK1_RAT Copa protein OS	0.60349	1.02309	5	0.879753	0.982791	5	0.12323	0.998319	5	-0.923927	0.976939	5
>tr|B5DFK6|B5DFK6_RAT Adaptor-related protein complex 3, delta 1 subunit, isoform CRA_b OS	0.530137	1.02263	1	-0.244719	1.01825	1	-0.995394	0.989674	1	-0.569834	1.02408	1
>tr|B7ZNL3|B7ZNL3_MOUSE Tpm1 protein OS	-1.03114	0.982892	1	-0.87162	0.989651	1	0.573669	1.01615	1	1.05874	0.922557	1
>tr|B9EKP7|B9EKP7_MOUSE PDZ domain containing RING finger 4 OS	1.19782	0.959924	1	0.632184	1.00863	1	0.00224354	0.999439	1	0.478138	1.02624	1
>tr|C0JPT7|C0JPT7_RAT Filamin alpha OS	2.11722	0.583864	11	0.485215	1.01155	11	0.0708809	0.992957	11	1.46917	0.783204	11
>tr|C9WPN7|C9WPN7_RAT Eif2s3y (Fragment) OS	-0.431062	1.03596	1	0.606951	1.00697	1	0.437998	1.02323	1	-0.902479	0.970173	1
>tr|D3Z3I0|D3Z3I0_MOUSE Uncharacterized protein OS	0.398265	1.03067	1	-0.758414	1.01423	1	-0.824612	0.988124	1	0.438361	1.02449	1
>tr|D3Z4H8|D3Z4H8_MOUSE MCG1042430 OS	0.310347	1.01453	2	-0.672446	1.0002	2	-0.231793	1.00374	2	1.2172	0.862256	2
>tr|D3Z848|D3Z848_RAT Uncharacterized protein OS	0.313678	1.01608	1	-0.385718	1.01609	1	-0.204802	1.00084	1	0.648005	1.01276	1
>tr|D3Z8I7|D3Z8I7_RAT Similar to Glutathione S-transferase, theta 3 (Predicted) OS	-0.0758351	1.00714	1	0.580356	1.01077	1	0.556981	1.01194	1	-0.139773	1.00591	1
>tr|D3Z8K5|D3Z8K5_RAT Ubiquitin carboxyl-terminal hydrolase OS	0.193957	1.02387	1	-0.525103	1.0154	1	-0.983055	0.984002	1	-0.518604	1.02934	1
>tr|D3Z8M7|D3Z8M7_RAT Uncharacterized protein OS	0.776997	1.01554	1	-1.60606	0.77594	1	-2.7922	0.181112	1	-0.913304	0.975703	1
>tr|D3Z8R4|D3Z8R4_RAT Uncharacterized protein OS	0.262807	1.01323	1	-0.193555	1.02072	1	-0.671819	1.01337	1	-0.463452	1.02684	1
>tr|D3Z8U8|D3Z8U8_RAT Glyceraldehyde-3-phosphate dehydrogenase OS				-0.38253	1.01687	1
>tr|D3Z8X6|D3Z8X6_RAT Uncharacterized protein OS	0.77293	1.01259	1	-0.122893	1.00044	1	-0.111318	0.991886	1	1.03784	0.931286	1
>tr|D3Z9A9|D3Z9A9_RAT Uncharacterized protein OS	-1.83851	0.713345	3	-1.50022	0.805205	3	-1.22816	1.03397	3	-1.61448	0.675125	3
>tr|D3Z9H5|D3Z9H5_RAT 40S ribosomal protein S6 OS	0.91071	0.992532	1	-0.793005	1.01619	1	-1.03033	0.996839	1	0.592961	1.0163	1
>tr|D3Z9Q9|D3Z9Q9_RAT Uncharacterized protein OS				-0.549678	1.00293	1
>tr|D3Z9R6|D3Z9R6_RAT Uncharacterized protein OS	0.319838	1.02059	1	-0.333306	1.01062	1	-0.726108	1.00875	1	-0.245091	1.0035	1
>tr|D3Z9R8|D3Z9R8_RAT RCG63555 OS	2.29425	0.461763	1	1.38501	0.850623	1	-0.402479	1.016	1	-0.411082	1.00542	1
>tr|D3Z9S8|D3Z9S8_RAT Uncharacterized protein OS	-0.0796234	1.00783	1	2.89324	0.159191	1	1.84398	0.730976	1	-2.07365	0.435872	1
>tr|D3Z9X1|D3Z9X1_RAT Uncharacterized protein OS	-0.709005	1.0182	1	-0.065932	0.995728	1	0.719064	1.00872	1	0.33627	1.013	1
>tr|D3Z9Z0|D3Z9Z0_RAT Ankyrin 1, erythroid OS	3.44006	0.0739967	1	-2.26629	0.337366	1	-4.22783	0.00383659	1	1.42968	0.792853	1
>tr|D3ZA12|D3ZA12_RAT Uncharacterized protein OS	0.592717	1.02494	1	-0.0480867	0.99563	1	-0.201269	1.00193	1	0.528917	1.03448	1
>tr|D3ZA96|D3ZA96_RAT Uncharacterized protein OS	-6.04111	2.53153e-06	4	-2.725	0.182005	4	1.32768	1.00104	4	1.71607	0.696544	4
>tr|D3ZAE2|D3ZAE2_RAT Uncharacterized protein OS	-0.560531	1.02065	1	0.063406	0.994711	1	1.37385	1.00579	1	1.36445	0.823585	1
>tr|D3ZAF6|D3ZAF6_RAT Uncharacterized protein OS	1.85268	0.700239	1	1.01944	0.952494	1	-0.214522	1.00134	1	0.0531329	1.00659	1
>tr|D3ZAP9|D3ZAP9_RAT Uncharacterized protein OS	1.50605	0.853189	1	1.21329	0.888371	1	-0.503008	1.00799	1	-0.901836	0.971077	1
>tr|D3ZAS9|D3ZAS9_RAT Similar to chromosome 20 open reading frame 116 (Predicted) OS	1.27334	0.929612	1	0.116262	0.997652	1	-1.44308	0.972973	1	-1.09563	0.911177	1
>tr|D3ZAZ0|D3ZAZ0_RAT Similar to Dendritic cell protein GA17 (Predicted) OS	0.372559	1.01599	1	-0.217431	1.01733	1	0.100925	0.9896	1	0.79846	1.00518	1
>tr|D3ZBN0|D3ZBN0_RAT RCG23067 OS	0.901247	0.993094	3	2.74054	0.692719	3	1.1309	1.0186	3	-0.315354	1.00996	3
>tr|D3ZC88|D3ZC88_RAT Elongation factor 1-alpha OS	-1.31136	0.920301	7	-0.0577935	0.995647	7	0.880262	1.00129	7	0.22817	1.00681	7
>tr|D3ZCD1|D3ZCD1_RAT Uncharacterized protein OS	-0.617017	1.01783	1	-0.398761	1.01804	1	-0.349001	1.0096	1	-0.783281	1.01141	1
>tr|D3ZCH5|D3ZCH5_RAT Uncharacterized protein OS	-0.16813	1.02515	2	-0.944064	0.97857	2	-0.534926	1.00703	2	0.552776	1.02679	2
>tr|D3ZCI4|D3ZCI4_RAT Uncharacterized protein OS	0.231445	1.0137	2	-0.631566	1.00595	2	-1.0974	1.00007	2	-0.669686	1.01613	2
>tr|D3ZCR3|D3ZCR3_RAT RCG50935 OS	1.10193	0.941884	5	-0.809367	1.00803	5	-0.927808	0.980891	5	1.22552	0.8624	5
>tr|D3ZCS4|D3ZCS4_RAT Uncharacterized protein OS	-0.0832502	1.00932	1	-0.0542515	0.994242	1	-0.0538362	0.99628	1	-0.139033	1.00447	1
>tr|D3ZCS9|D3ZCS9_RAT Similar to transthyretin (4L369) (Predicted), isoform CRA_a OS	-0.263782	1.01463	1	-0.736078	0.996138	1	-0.454886	1.0189	1	0.126889	1.00622	1
>tr|D3ZCV1|D3ZCV1_RAT Uncharacterized protein OS	-1.46614	0.860864	1	0.187964	1.01865	1	1.1976	1.03221	1	-0.227013	1.00631	1
>tr|D3ZD11|D3ZD11_RAT Uncharacterized protein OS	0.00704775	1.00348	2	0.13532	1.00692	2	-0.32071	1.00657	2	-0.859877	0.981592	2
>tr|D3ZD23|D3ZD23_RAT ATP-binding cassette, sub-family E (OABP), member 1 OS	0.474691	1.03682	4	-0.104361	0.997521	4	0.385902	1.01291	4	1.79856	0.588302	4
>tr|D3ZD89|D3ZD89_RAT Uncharacterized protein OS	-0.908251	0.987906	1	-0.420217	1.01361	1	-0.0319636	1.00034	1	-0.593406	1.02153	1
>tr|D3ZD97|D3ZD97_RAT DEAH (Asp-Glu-Ala-His) box polypeptide 15 (Predicted), isoform CRA_b OS	0.856078	1.00667	4	0.103839	0.997971	4	-0.83386	0.979863	4	-1.10245	0.90684	4
>tr|D3ZDE9|D3ZDE9_RAT Uncharacterized protein OS	0.765237	1.01323	1	-0.946769	0.979647	1	-1.19712	1.0246	1	0.707218	1.02044	1
>tr|D3ZDP4|D3ZDP4_RAT Uncharacterized protein OS	1.50433	0.849415	1	0.0556591	0.994934	1	-0.24364	1.00614	1	1.45447	0.778969	1
>tr|D3ZDQ1|D3ZDQ1_RAT Uncharacterized protein OS	2.65066	0.255528	2	1.04095	0.958561	2	0.362881	1.00374	2	2.24176	0.329776	2
>tr|D3ZDV3|D3ZDV3_RAT Putative uncharacterized protein RGD1307051_predicted OS	-0.245292	1.01253	1	1.17127	0.898186	1	0.965943	0.980509	1	-0.60005	1.0168	1
>tr|D3ZE15|D3ZE15_RAT RCG38845, isoform CRA_b OS	0.306556	1.01021	2	0.71387	0.992204	2	0.293838	1.00823	2	-0.385729	1.00292	2
>tr|D3ZE37|D3ZE37_RAT Uncharacterized protein OS	0.480453	1.03319	6	-0.519459	1.01485	6	-0.631399	1.02529	6	0.375135	1.00796	6
>tr|D3ZE69|D3ZE69_RAT Uncharacterized protein OS	0.706244	1.02185	2	0.704276	0.998392	2	-0.126334	0.999682	2	-0.70681	1.02098	2
>tr|D3ZE72|D3ZE72_RAT Methionine aminopeptidase OS	0.344045	1.01919	1	-0.299741	1.01471	1	0.109177	0.99108	1	1.03002	0.937275	1
>tr|D3ZEF3|D3ZEF3_RAT Uncharacterized protein OS	1.24345	0.937572	1	-1.39811	0.848502	1	-2.50987	0.311714	1	-0.101508	1.00654	1
>tr|D3ZEI0|D3ZEI0_RAT Uncharacterized protein OS	0.172731	1.02453	1	-0.634362	1.00822	1	-0.856504	0.99521	1	-0.127198	1.00803	1
>tr|D3ZF13|D3ZF13_RAT Acyl carrier protein OS	-1.05896	0.965787	1	-0.686863	1.00479	1	0.161215	0.999823	1	-0.0290066	1.00661	1
>tr|D3ZF37|D3ZF37_RAT Uncharacterized protein OS	-0.0704936	1.00518	3	-0.534083	1.011	3	0.470539	1.016	3	1.84347	0.5698	3
>tr|D3ZFE2|D3ZFE2_RAT Uncharacterized protein OS	2.30457	0.473642	1	0.527799	1.01532	1	-1.59073	0.940797	1	-0.460654	1.02702	1
>tr|D3ZFH6|D3ZFH6_RAT Uncharacterized protein OS	0.970078	0.985889	2	-0.0721295	0.995555	2	-1.02632	0.991017	2	-0.600595	1.01962	2
>tr|D3ZFJ6|D3ZFJ6_RAT Lactamase, beta (Predicted) OS	-1.10211	0.945591	24	-0.163015	1.00955	24	-0.590531	1.01377	24	-2.7301	0.111947	24
>tr|D3ZFQ8|D3ZFQ8_RAT Cytochrome c-1 (Predicted), isoform CRA_c OS	0.387585	1.02578	3	0.840819	0.987813	3	0.357193	1.00537	3	-0.506622	1.02322	3
>tr|D3ZFZ2|D3ZFZ2_RAT Uncharacterized protein OS	0.763183	1.01184	1	-0.217343	1.01741	1	-0.762039	0.996229	1	0.0498613	1.00803	1
>tr|D3ZFZ8|D3ZFZ8_RAT 40S ribosomal protein S24 OS	1.30555	0.921749	1	-1.47031	0.823232	1	-0.960906	0.980843	1	2.25596	0.325791	1
>tr|D3ZG02|D3ZG02_RAT Uncharacterized protein OS	-1.05728	0.96834	1	-1.23414	0.86964	1	-0.158766	1.00062	1	0.680203	1.02299	1
>tr|D3ZG43|D3ZG43_RAT NADH dehydrogenase (Ubiquinone) Fe-S protein 3 (Predicted), isoform CRA_c OS	1.05072	0.968594	6	1.09417	0.937258	6	0.615576	1.0199	6	0.222233	1.00404	6
>tr|D3ZG47|D3ZG47_RAT Similar to cell division cycle and apoptosis regulator 1 (Predicted), isoform CRA_a OS	2.33072	0.460515	1	0.615661	1.00409	1	-1.68538	0.89493	1	-0.819646	0.995195	1
>tr|D3ZGE2|D3ZGE2_RAT Myeloperoxidase (Mapped) OS	-0.325369	1.02587	1	-1.02645	0.956411	1	-1.36069	1.01543	1	-0.994137	0.961059	1
>tr|D3ZGE6|D3ZGE6_RAT Cortactin, isoform CRA_c OS	0.966694	0.985598	3	-0.319172	1.01117	3	-1.43273	0.976469	3	-1.38864	0.806831	3
>tr|D3ZGL8|D3ZGL8_RAT Uncharacterized protein OS	-2.36668	0.436568	1	-2.40186	0.277966	1	-0.537734	1.00689	1	-0.0401056	1.00579	1
>tr|D3ZGP5|D3ZGP5_RAT RCG31562, isoform CRA_b OS	0.664717	1.01862	1	-0.254471	1.01487	1	-2.25189	0.520523	1	-2.49031	0.218186	1
>tr|D3ZGU2|D3ZGU2_RAT Putative uncharacterized protein RGD1307051_predicted OS	-0.121345	1.01512	3	1.78259	0.688796	3	1.19848	1.03068	3	-1.19685	0.853952	3
>tr|D3ZH40|D3ZH40_RAT RCG51753 OS	0.26129	1.01238	1	0.781011	1.01412	1	0.360108	1.00405	1	-0.393217	1.00563	1
>tr|D3ZH53|D3ZH53_RAT Uncharacterized protein OS	-1.09261	0.946104	2	-1.50842	0.807037	2	-0.563915	1.0168	2	0.271165	1.00306	2
>tr|D3ZHP2|D3ZHP2_RAT Serine/threonine-protein phosphatase OS	-0.103623	1.01301	1	-0.443337	1.01204	1	-0.0954071	0.990382	1	0.417539	1.00575	1
>tr|D3ZIC2|D3ZIC2_RAT Uncharacterized protein OS	0.0604259	1.0053	4	0.496047	1.01289	4	1.02768	0.988939	4	1.39035	0.811617	4
>tr|D3ZIE1|D3ZIE1_RAT 40S ribosomal protein S8 OS	-2.65488	0.262448	2	-2.52257	0.22889	2	-0.698229	1.01632	2	-0.11953	1.00375	2
>tr|D3ZIL6|D3ZIL6_RAT Enoyl Coenzyme A hydratase domain containing 2 (Predicted), isoform CRA_a OS	-2.67617	0.24634	5	2.61147	0.209109	5	2.93155	0.189108	5	-1.92692	0.525026	5
>tr|D3ZIN5|D3ZIN5_RAT Uncharacterized protein OS	1.39896	0.901206	2	0.094772	0.997357	2	0.219115	1.00073	2	2.08039	0.428754	2
>tr|D3ZIW7|D3ZIW7_RAT Uncharacterized protein OS	0.12739	1.02084	1	0.127011	1.00215	1	-2.04114	0.620847	1	-3.6416	0.0137509	1
>tr|D3ZIX0|D3ZIX0_RAT Laminin, beta 1 (Predicted) OS	0.667168	1.01919	1	-2.00969	0.50513	1	-2.8998	0.173474	1	-0.542776	1.02554	1
>tr|D3ZJ92|D3ZJ92_RAT Pre-mRNA processing factor 40 homolog A (Yeast) (Predicted) OS	1.62275	0.812578	2	0.672242	1.00046	2	-0.563787	1.01696	2	-0.314382	1.00845	2
>tr|D3ZJF4|D3ZJF4_RAT Uncharacterized protein OS	0.131693	1.01907	4	-2.27609	0.334594	4	-0.619204	1.02613	4	3.28649	0.840775	4
>tr|D3ZJH9|D3ZJH9_RAT Malic enzyme OS	-0.919579	0.987961	1	-0.619432	1.00619	1	0.251496	1.00472	1	0.215969	1.00546	1
>tr|D3ZJL5|D3ZJL5_RAT Uncharacterized protein OS	-1.05064	0.96871	4	-1.4123	0.842266	4	-1.52997	0.966575	4	-1.7383	0.612039	4
>tr|D3ZJQ1|D3ZJQ1_RAT Uncharacterized protein OS	1.19554	0.958813	1	2.71796	0.185926	1	0.853598	0.994635	1	-1.55113	0.732432	1
>tr|D3ZJX7|D3ZJX7_RAT Uncharacterized protein OS	0.4205	1.03817	2	-0.595458	1.00663	2	-1.25211	1.03109	2	-0.72476	1.01875	2
>tr|D3ZJY5|D3ZJY5_RAT Uncharacterized protein OS	0.252316	1.0134	3	-1.29523	0.862565	3	-0.0254828	0.998085	3	0.793981	1.00694	3
>tr|D3ZJZ0|D3ZJZ0_RAT RGD1563250 (Predicted), isoform CRA_a OS	0.12157	1.0163	1	-0.622806	1.00541	1	-0.312103	1.00703	1	0.486707	1.02044	1
>tr|D3ZK34|D3ZK34_RAT Uncharacterized protein OS	-0.287142	1.01202	2	-0.78556	1.01784	2	-0.945812	0.976861	2	-0.794223	1.00661	2
>tr|D3ZK97|D3ZK97_RAT Uncharacterized protein OS	0.43983	1.03384	1	-0.976692	0.975071	1	-1.29144	1.00185	1	-0.186064	1.00676	1
>tr|D3ZKJ3|D3ZKJ3_RAT Uncharacterized protein OS	-0.80684	1.00766	1	-0.762728	1.01666	1	0.260864	1.00809	1	0.631591	1.01409	1
>tr|D3ZKJ7|D3ZKJ7_RAT Molybdenum cofactor synthesis 1 (Predicted), isoform CRA_c OS	1.46922	0.865282	1	1.38559	0.849711	1	0.20489	1.00076	1	-0.0529173	1.00547	1
>tr|D3ZKK3|D3ZKK3_RAT Uncharacterized protein OS	-0.364246	1.01607	1	0.0787393	0.993141	1	0.480714	1.01039	1	0.174532	1.00358	1
>tr|D3ZL86|D3ZL86_RAT HEAT repeat containing 1 (Predicted) OS	0.457576	1.03636	1	-0.463423	1.01408	1	-0.219852	1.00153	1	0.85245	0.982792	1
>tr|D3ZLA3|D3ZLA3_RAT Copine III (Predicted), isoform CRA_b OS	0.0989615	1.01304	1	-0.756678	1.0111	1	-0.419541	1.0207	1	0.679724	1.02361	1
>tr|D3ZLC1|D3ZLC1_RAT Uncharacterized protein OS	-0.0167527	1.00672	1	0.748084	1.00114	1	0.216794	1.00143	1	-0.788913	1.0066	1
>tr|D3ZLI0|D3ZLI0_RAT Myeloid/lymphoid or mixed-lineage leukemia (Mapped) OS	-0.197637	1.02188	1	1.26449	0.860282	1	2.86699	0.177315	1	2.34768	0.284062	1
>tr|D3ZLN0|D3ZLN0_RAT Uncharacterized protein OS	-0.878198	0.99564	1	-0.393781	1.01627	1	0.279324	1.00497	1	0.112901	1.00477	1
>tr|D3ZLP4|D3ZLP4_RAT Uncharacterized protein OS	-0.998846	0.975426	1	-1.5335	0.800788	1	0.101402	0.989193	1	1.41644	0.797475	1
>tr|D3ZLR3|D3ZLR3_RAT Uncharacterized protein OS	-0.735769	1.00916	1	-1.02345	0.951909	1	-0.539601	1.00787	1	-0.15774	1.00173	1
>tr|D3ZLT1|D3ZLT1_RAT NADH dehydrogenase (Ubiquinone) 1 beta subcomplex, 7 (Predicted) OS	1.849	0.706043	1	0.644056	1.00537	1	-0.597529	1.01079	1	-0.0319132	1.00422	1
>tr|D3ZM21|D3ZM21_RAT Catechol-O-methyltransferase domain containing 1 (Predicted), isoform CRA_a OS	-1.50754	0.857427	1	-0.917027	0.979974	1	0.486245	1.00808	1	0.688281	1.02946	1
>tr|D3ZM33|D3ZM33_RAT Uncharacterized protein OS	-0.0350183	1.00613	5	-1.09513	0.935817	5	-0.812347	0.985995	5	0.434751	1.02269	5
>tr|D3ZMD2|D3ZMD2_RAT 40S ribosomal protein S12 OS	-0.284062	1.0127	1	-1.41841	0.838056	1	-0.963116	0.977608	1	0.158426	1.00252	1
>tr|D3ZMR0|D3ZMR0_RAT Uncharacterized protein OS	0.649853	1.02169	1	0.6544	1.01118	1	-0.245804	1.00791	1	-0.681673	1.02497	1
>tr|D3ZN21|D3ZN21_RAT RCG20177 OS	-0.774597	1.01456	11	-0.362317	1.01147	11	-0.245144	1.00623	11	-0.788787	1.00678	11
>tr|D3ZN73|D3ZN73_RAT Uncharacterized protein OS	0.471307	1.03565	9	-0.858131	0.988892	9	-1.13902	1.02508	9	-0.543123	1.02844	9
>tr|D3ZN79|D3ZN79_RAT Uncharacterized protein OS	-0.43737	1.03468	1	-1.39059	0.847111	1	-1.32203	1.00898	1	-0.455335	1.02406	1
>tr|D3ZNH4|D3ZNH4_RAT Histone H2B OS	1.8972	0.67327	1	-0.675647	0.999726	1	-2.07148	0.593321	1	0.334487	1.01484	1
>tr|D3ZNI4|D3ZNI4_RAT Uncharacterized protein OS	1.01353	0.979184	1	0.319471	1.0125	1	0.558014	1.0107	1	1.80738	0.585825	1
>tr|D3ZNM2|D3ZNM2_RAT Uncharacterized protein OS	0.0476819	1.00575	6	-0.522754	1.01405	6	-0.210011	0.999653	6	0.679213	1.02039	6
>tr|D3ZNS6|D3ZNS6_RAT Uncharacterized protein OS	0.0587399	1.0048	1	0.432943	1.01151	1	0.746551	1.00731	1	0.532933	1.03186	1
>tr|D3ZNY3|D3ZNY3_RAT Methylmalonic aciduria (Cobalamin deficiency) cblA type (Predicted), isoform CRA_a OS	-0.211849	1.01812	2	0.442215	1.01049	2	0.53718	1.00755	2	-0.194104	1.00885	2
>tr|D3ZNZ8|D3ZNZ8_RAT Ribosomal protein S27 OS	2.06776	0.597645	1	-0.0736488	0.994278	1	-1.89964	0.718946	1	-0.238662	1.00508	1
>tr|D3ZPA9|D3ZPA9_RAT RCG32401, isoform CRA_a OS	-0.184365	1.02175	1	-0.0600858	0.995608	1	-0.0301894	0.999899	1	-0.184688	1.00584	1
>tr|D3ZQ69|D3ZQ69_RAT Uncharacterized protein OS	-0.813778	1.00686	1	-0.491539	1.01313	1	0.52368	1.00661	1	0.593097	1.01844	1
>tr|D3ZQB1|D3ZQB1_RAT Uncharacterized protein OS	0.127351	1.01877	1	0.461512	1.01337	1	0.85591	0.996045	1	0.750625	1.02008	1
>tr|D3ZQE8|D3ZQE8_RAT Uncharacterized protein OS	-0.324436	1.02684	1	-0.222629	1.01609	1	-0.406953	1.01668	1	-0.768883	1.0152	1
>tr|D3ZQL1|D3ZQL1_RAT Putative uncharacterized protein RGD1305045_predicted OS	0.691922	1.0199	1	0.447443	1.01401	1	-0.0998209	0.988581	1	-0.0370789	1.00636	1
>tr|D3ZQM0|D3ZQM0_RAT Splicing factor 3a, subunit 1 (Predicted) OS	1.13076	0.946762	2	-0.738748	1.00039	2	-0.781193	0.995499	2	1.3021	0.860553	2
>tr|D3ZQT6|D3ZQT6_RAT Uncharacterized protein OS	-2.94545	0.183925	1	-0.861475	0.993258	1	1.05588	1.00468	1	-0.878394	0.974219	1
>tr|D3ZQW3|D3ZQW3_RAT Similar to 6430573F11Rik protein (Predicted), isoform CRA_d OS	-1.285	0.928825	1	-0.935532	0.969582	1	0.832638	0.981534	1	1.25357	0.867772	1
>tr|D3ZQY2|D3ZQY2_RAT Uncharacterized protein OS	1.09611	0.946734	2	-0.798344	1.0117	2	-1.29837	1.00863	2	0.276836	1.00222	2
>tr|D3ZRE8|D3ZRE8_RAT RCG56071 OS	-1.30753	0.926585	1	-1.49641	0.802473	1	-0.522442	1.00495	1	-0.122509	1.00525	1
>tr|D3ZRF5|D3ZRF5_RAT RCG47744, isoform CRA_c OS	-0.161975	1.02502	2	0.272379	1.01353	2	-0.0239152	0.998108	2	-0.151139	1.00204	2
>tr|D3ZRM0|D3ZRM0_RAT Uncharacterized protein OS	0.0470517	1.00437	1	0.662023	1.00389	1	0.547046	1.01295	1	-0.165809	1.00365	1
>tr|D3ZRN3|D3ZRN3_RAT Similar to cytoplasmic beta-actin (Predicted) OS	-0.761967	1.00657	5	-1.1058	0.935247	5	0.732787	1.01067	5	3.39052	0.0257482	5
>tr|D3ZS00|D3ZS00_RAT Uncharacterized protein OS	1.3573	0.897303	1	0.651062	1.01184	1	0.385249	1.01091	1	1.19838	0.857595	1
>tr|D3ZSA9|D3ZSA9_RAT Similar to pM5 protein; DNA segment, Chr 7, ERATO Doi 156, expressed (Predicted) OS	-1.10435	0.94219	1	-0.572842	1.00903	1	0.170458	0.999232	1	-0.225149	1.00354	1
>tr|D3ZSM1|D3ZSM1_RAT Similar to protein 4.1G (Predicted), isoform CRA_a OS	0.00733324	1.00447	1	0.475795	1.01548	1	0.300822	1.00856	1	-0.323949	1.01208	1
>tr|D3ZSS1|D3ZSS1_RAT TAF15 RNA polymerase II, TATA box binding protein (TBP)-associated factor (Predicted), isoform CRA_a OS	-1.15863	0.953002	1	-1.81889	0.654031	1	-2.16717	0.534142	1	-2.16223	0.382269	1
>tr|D3ZT78|D3ZT78_RAT Uncharacterized protein OS	-2.51774	0.336819	5	-2.66418	0.195282	5	-0.814353	0.987587	5	0.75593	1.0214	5
>tr|D3ZT90|D3ZT90_RAT Glutaryl-Coenzyme A dehydrogenase (Predicted) OS	-0.749235	1.00866	9	-0.830393	0.993482	9	-0.0793033	0.991681	9	0.477252	1.02419	9
>tr|D3ZTG6|D3ZTG6_RAT Uncharacterized protein OS	-3.04417	0.160797	1	-1.00307	0.964227	1	-0.497654	1.00605	1	-3.34575	0.030288	1
>tr|D3ZTG8|D3ZTG8_RAT Uncharacterized protein OS	1.58007	0.827651	1	-0.43556	1.01139	1	-2.65699	0.237404	1	-1.61544	0.673804	1
>tr|D3ZTP0|D3ZTP0_RAT Uncharacterized protein OS	0.235813	1.01483	15	1.95036	0.550921	15	1.50127	0.980644	15	-0.901145	0.967322	15
>tr|D3ZTT5|D3ZTT5_RAT Uncharacterized protein OS	-1.24415	0.943943	2	-1.44145	0.843228	2	-0.890351	0.996631	2	-0.725256	1.02082	2
>tr|D3ZTT9|D3ZTT9_RAT Ribosomal protein L37 OS	2.88532	0.202107	1	-0.337168	1.01161	1	-2.72421	0.205502	1	-0.0231644	1.00567	1
>tr|D3ZTX0|D3ZTX0_RAT Toll-like receptor adaptor molecule 2 (Predicted), isoform CRA_a OS	0.545088	1.01651	2	-0.14875	1.00789	2	-0.727814	1.01052	2	-0.452752	1.02401	2
>tr|D3ZU13|D3ZU13_RAT Uncharacterized protein OS	-0.731978	1.01154	6	-0.586844	1.00835	6	-0.0901195	0.991617	6	0.0494291	1.00644	6
>tr|D3ZU80|D3ZU80_RAT Ribosomal protein L15 OS	0.699311	1.01795	4	-1.27038	0.871094	4	-1.26632	1.02134	4	0.620294	1.01158	4
>tr|D3ZUB3|D3ZUB3_RAT RCG64128 OS	-0.243558	1.01422	1	2.01302	0.511577	1	1.88398	0.728251	1	-0.670716	1.0148	1
>tr|D3ZUM0|D3ZUM0_RAT Uncharacterized protein OS	0.012227	1.00421	2	0.119726	0.998579	2	0.11088	0.990938	2	0.0466357	1.00682	2
>tr|D3ZUQ8|D3ZUQ8_RAT Uncharacterized protein OS	0.0941689	1.01386	1	-0.183705	1.02045	1	0.0140799	0.999213	1	0.420416	1.00724	1
>tr|D3ZUS1|D3ZUS1_RAT Uncharacterized protein OS	-2.1046	0.584298	1	-2.1502	0.414728	1	-0.69642	1.01477	1	-0.389875	1.00384	1
>tr|D3ZUU8|D3ZUU8_RAT Similar to SEC14 (S. cerevisiae)-like 2 (Predicted), isoform CRA_b OS	1.48076	0.852642	3	2.16521	0.419175	3	1.20995	1.02781	3	-0.0201673	1.00432	3
>tr|D3ZUV3|D3ZUV3_RAT Eukaryotic translation initiation factor 2A, isoform CRA_b OS	-0.257248	1.0109	2	-0.272983	1.01528	2	-0.150682	1.00228	2	-0.306036	1.00863	2
>tr|D3ZUX5|D3ZUX5_RAT Coiled-coil-helix-coiled-coil-helix domain containing 3 (Predicted), isoform CRA_a OS	1.88828	0.672866	1	1.21162	0.884613	1	-0.439621	1.02336	1	-0.297231	1.00521	1
>tr|D3ZUY8|D3ZUY8_RAT Adaptor protein complex AP-2, alpha 1 subunit (Predicted) OS	0.283346	1.01342	1	-0.398174	1.01688	1	-0.613729	1.01747	1	-0.0254598	1.0057	1
>tr|D3ZV36|D3ZV36_RAT 40S ribosomal protein S12 OS	-1.60121	0.814562	2	-2.29027	0.331073	2	-0.78088	0.99173	2	0.694224	1.02164	2
>tr|D3ZV37|D3ZV37_RAT RCG33529, isoform CRA_b OS	0.0355244	1.0076	1	-0.231632	1.01722	1	-0.194831	1.0006	1	0.102054	1.0081	1
>tr|D3ZV50|D3ZV50_RAT Uncharacterized protein OS	0.7449	1.00502	6	-0.551088	1.00437	6	-1.48128	0.962607	6	-0.161746	1.00165	6
>tr|D3ZVC6|D3ZVC6_RAT Nucleolar protein family A, member 2 (Predicted), isoform CRA_a OS	-0.154157	1.02281	1	0.505199	1.00828	1	0.443891	1.02149	1	-0.383666	1.00511	1
>tr|D3ZVH2|D3ZVH2_RAT Uncharacterized protein OS	-0.728663	1.0093	11	-1.34416	0.865959	11	-0.771617	0.99582	11	0.152984	1.00249	11
>tr|D3ZVQ0|D3ZVQ0_RAT Ubiquitin carboxyl-terminal hydrolase OS	0.384606	1.02357	1	0.15462	1.00742	1	0.595359	1.01117	1	1.03448	0.936168	1
>tr|D3ZVR6|D3ZVR6_RAT RCG44470 OS	0.48296	1.03334	1	0.0873885	0.997244	1	-1.25079	1.0242	1	-1.57339	0.708609	1
>tr|D3ZW86|D3ZW86_RAT Uncharacterized protein OS	-1.09099	0.942662	2	-1.36299	0.856734	2	-0.869706	1.00182	2	-0.596714	1.01744	2
>tr|D3ZWT4|D3ZWT4_RAT Uncharacterized protein OS	1.62463	0.809462	1	0.565392	1.00836	1	-1.1536	1.03941	1	-0.838703	0.982314	1
>tr|D3ZWX0|D3ZWX0_RAT Uncharacterized protein OS	1.19139	0.958341	1	0.521508	1.01245	1	-0.0450661	0.995272	1	0.555724	1.02658	1
>tr|D3ZWX6|D3ZWX6_RAT Uncharacterized protein OS	0.081197	1.00779	1	-0.867584	0.992278	1	-0.299066	1.00787	1	0.98581	0.962601	1
>tr|D3ZWX8|D3ZWX8_RAT Uncharacterized protein OS	-0.161323	1.02416	1	-0.347538	1.01171	1	-0.182351	0.999087	1	0.192801	1.01007	1
>tr|D3ZWY2|D3ZWY2_RAT Uncharacterized protein OS	-0.240645	1.01244	2	-0.221004	1.01615	2	-0.0464192	0.995422	2	-0.0146536	1.00251	2
>tr|D3ZX01|D3ZX01_RAT RCG29848 OS	0.757869	1.00524	7	-0.784738	1.01468	7	-0.919073	0.983448	7	0.244918	1.00367	7
>tr|D3ZXA3|D3ZXA3_RAT Uncharacterized protein OS	-0.653383	1.02085	7	-2.7238	0.182668	7	-1.91956	0.715188	7	0.801462	0.968044	7
>tr|D3ZXD8|D3ZXD8_RAT Uncharacterized protein OS	-1.50542	0.854235	1	-0.0379169	0.994772	1	0.502599	1.00542	1	-1.18964	0.858511	1
>tr|D3ZXE8|D3ZXE8_RAT Uncharacterized protein OS	-2.0257	0.6264	1	-1.11916	0.930789	1	0.994683	0.985116	1	0.816047	0.988406	1
>tr|D3ZXF1|D3ZXF1_RAT Uncharacterized protein OS	0.132715	1.02025	1	-0.782067	1.01551	1	-0.421573	1.02418	1	0.773353	1.01198	1
>tr|D3ZXH5|D3ZXH5_RAT RCG32827, isoform CRA_b OS	-0.503685	1.02974	1	-0.729565	0.995705	1	-0.690697	1.01316	1	-0.546173	1.02476	1
>tr|D3ZXL5|D3ZXL5_RAT Similar to RIKEN cDNA 1200014J11 (Predicted) OS	-0.838566	1.00216	1	-1.89227	0.598895	1	0.104902	0.990794	1	2.36736	0.277091	1
>tr|D3ZXS6|D3ZXS6_RAT Elongation factor 1-alpha OS	-1.38809	0.901291	2	-1.0365	0.961513	2	-0.952732	0.977107	2	-1.74019	0.609571	2
>tr|D3ZXY4|D3ZXY4_RAT Uncharacterized protein OS	-0.80487	1.01039	9	0.36224	1.01155	9	1.1609	1.04302	9	1.02989	0.937472	9
>tr|D3ZYF9|D3ZYF9_RAT Uncharacterized protein OS	-0.963154	0.982065	2	-1.66614	0.733005	2	-0.845977	0.996057	2	0.2457	1.00446	2
>tr|D3ZYK5|D3ZYK5_RAT Uncharacterized protein OS	-1.16577	0.955193	1	-1.84896	0.633266	1	-0.97315	0.980581	1	-0.0659139	1.00895	1
>tr|D3ZYS7|D3ZYS7_RAT Uncharacterized protein OS	-0.0291335	1.0047	1	0.0643654	0.995785	1	0.332135	1.00829	1	0.357128	1.01289	1
>tr|D3ZYZ2|D3ZYZ2_RAT Uncharacterized protein OS	-0.890235	0.997583	1	-0.953005	0.987466	1	-0.128978	0.997356	1	0.213737	1.00233	1
>tr|D3ZZ95|D3ZZ95_RAT 60S ribosomal protein L36 OS	1.614	0.815727	1	-1.15207	0.907013	1	-1.79674	0.784563	1	1.20294	0.866886	1
>tr|D3ZZA8|D3ZZA8_RAT SEC24 related gene family, member A (S. cerevisiae) (Predicted) OS	-0.504571	1.03183	2	0.921273	0.977108	2	1.06056	1.01674	2	-0.00264913	1.00221	2
>tr|D3ZZC1|D3ZZC1_RAT RCG43947 OS	0.503032	1.03051	1	-0.365239	1.01267	1	0.424654	1.02555	1	1.91412	0.531189	1
>tr|D3ZZC7|D3ZZC7_RAT Uncharacterized protein OS	0.985916	0.980227	1	-0.0555153	0.993196	1	-0.606043	1.0095	1	0.396043	1.00801	1
>tr|D3ZZK1|D3ZZK1_RAT Uncharacterized protein OS	0.322757	1.02603	3	-0.285915	1.01423	3	-0.186939	1.00136	3	0.65124	1.01602	3
>tr|D3ZZN4|D3ZZN4_RAT Uncharacterized protein OS	-0.550286	1.01887	3	-1.41753	0.834079	3	-1.22539	1.03888	3	-0.459	1.02891	3
>tr|D3ZZR5|D3ZZR5_RAT Uncharacterized protein OS	1.11011	0.945481	1	-0.167019	1.01293	1	-1.27782	1.01657	1	-0.377095	1.00589	1
>tr|D3ZZR9|D3ZZR9_RAT FK506 binding protein 2 (Predicted), isoform CRA_g OS	-0.573755	1.01892	5	-1.18368	0.899817	5	-0.423693	1.0247	5	1.25477	0.865982	5
>tr|D3ZZT9|D3ZZT9_RAT Uncharacterized protein OS	-0.170094	1.02552	1	1.41964	0.836133	1	1.33511	1.01606	1	-0.380479	1.00584	1
>tr|D3ZZW6|D3ZZW6_RAT RCG34727 OS	-2.03244	0.616365	1	-1.38052	0.849851	1	1.44108	0.976655	1	2.63052	0.162887	1
>tr|D3ZZZ9|D3ZZZ9_RAT Catenin (Cadherin associated protein), delta 1 (Predicted), isoform CRA_a OS	-0.467546	1.03798	8	-0.168434	1.01375	8	0.511933	1.01097	8	0.961616	0.964766	8
>tr|D4A0P4|D4A0P4_RAT RCG33140 OS	-0.387675	1.02568	5	-1.00934	0.958529	5	-0.0305889	0.997659	5	3.31685	1.02221	5
>tr|D4A0S8|D4A0S8_RAT Uncharacterized protein OS	0.282694	1.01168	1	0.289003	1.01511	1	0.640427	1.02241	1	0.937102	0.973021	1
>tr|D4A0T0|D4A0T0_RAT RCG32945 OS	0.413395	1.03652	3	0.485028	1.01176	3	1.31996	1.01272	3	1.78008	0.591759	3
>tr|D4A0X4|D4A0X4_RAT Elongation factor 1-alpha OS	-3.23552	0.106213	8	-1.69889	0.728219	8	-0.625436	1.02553	8	-1.87785	0.554192	8
>tr|D4A103|D4A103_RAT Uncharacterized protein OS	0.161083	1.02221	1	-0.940757	0.973453	1	-0.834539	0.978937	1	0.469358	1.02716	1
>tr|D4A132|D4A132_RAT Uncharacterized protein OS	0.430177	1.03696	2	-0.453656	1.01271	2	-0.379034	1.0095	2	0.941325	0.973663	2
>tr|D4A147|D4A147_RAT Uncharacterized protein OS	-0.0709452	1.0048	1	1.35677	0.861376	1	2.07417	0.589446	1	1.02227	0.9361	1
>tr|D4A1D0|D4A1D0_RAT Uncharacterized protein OS	-0.59007	1.02137	1	-2.00179	0.51471	1	-0.252268	1.0063	1	2.14323	0.400941	1
>tr|D4A1G8|D4A1G8_RAT Uncharacterized protein OS	0.28986	1.01491	1	0.297997	1.01648	1	0.902698	0.985506	1	1.28294	0.861728	1
>tr|D4A1I7|D4A1I7_RAT RCG47137 OS	-0.1181	1.01594	1	0.463679	1.01379	1	-0.0300284	0.998143	1	-1.04629	0.929787	1
>tr|D4A1V2|D4A1V2_RAT Uncharacterized protein OS	1.00143	0.975209	1	-0.0817455	0.995662	1	-1.31376	1.01051	1	-0.756778	1.02024	1
>tr|D4A1W8|D4A1W8_RAT Microsomal triglyceride transfer protein OS	1.27863	0.926187	3	0.67155	0.997765	3	0.0350057	0.99785	3	0.185047	1.0055	3
>tr|D4A1Y6|D4A1Y6_RAT Uncharacterized protein OS	-2.17936	0.557128	1	-1.33883	0.856939	1	1.82909	0.740344	1	2.34416	0.28676	1
>tr|D4A264|D4A264_RAT Uncharacterized protein OS	0.0199296	1.00786	1	-0.0354575	0.993732	1	0.148622	1.00202	1	0.299931	1.00739	1
>tr|D4A2K1|D4A2K1_RAT Similar to RIKEN cDNA 0610010D20 (Predicted) OS	0.190139	1.02374	6	1.28773	0.860401	6	0.705289	1.01494	6	-0.604181	1.01868	6
>tr|D4A2S4|D4A2S4_RAT Uncharacterized protein OS	-0.0699334	1.00566	1	0.486871	1.01161	1	0.211985	1.0015	1	-0.554198	1.02843	1
>tr|D4A2Z6|D4A2Z6_RAT SEC63-like (S. cerevisiae) (Predicted) OS	0.635409	1.0207	3	-0.739868	1.00152	3	-1.54873	0.972773	3	-0.979137	0.958341	3
>tr|D4A2Z9|D4A2Z9_RAT Uncharacterized protein OS	-0.341273	1.02038	2	0.429664	1.01238	2	0.845367	0.992323	2	0.244337	1.00193	2
>tr|D4A305|D4A305_RAT Coiled-coil domain containing 58 (Predicted), isoform CRA_c OS	0.749351	1.00851	1	1.24125	0.863224	1	0.954352	0.974754	1	0.464114	1.02912	1
>tr|D4A311|D4A311_RAT NADH dehydrogenase (Ubiquinone) 1 alpha subcomplex, 8 OS	0.281188	1.00921	2	0.433717	1.01066	2	0.0501463	0.997425	2	-0.404886	1.00483	2
>tr|D4A319|D4A319_RAT Uncharacterized protein OS	-0.218901	1.01817	1	-0.648945	1.01095	1	-1.18227	1.03356	1	-1.23293	0.864028	1
>tr|D4A3B0|D4A3B0_RAT Uncharacterized protein OS	1.0766	0.958562	1	1.19793	0.890701	1	0.622128	1.02244	1	0.403005	1.00414	1
>tr|D4A3K5|D4A3K5_RAT Histone 1, H1a (Predicted) OS	1.79407	0.725391	1	0.717923	0.990695	1	-1.1022	0.999153	1	-0.67432	1.01776	1
>tr|D4A3K8|D4A3K8_RAT Uncharacterized protein OS	-0.861207	1.00564	1	-1.04828	0.956865	1	0.295094	1.00697	1	1.11098	0.900042	1
>tr|D4A3L8|D4A3L8_RAT RCG47053 OS	2.58881	0.289621	1	1.95096	0.550156	1	-1.19076	1.02723	1	-1.83989	0.568262	1
>tr|D4A3V2|D4A3V2_RAT NADH dehydrogenase [ubiquinone] 1 alpha subcomplex subunit 6 OS	-1.44605	0.875221	2	-0.164627	1.01229	2	0.264037	1.00734	2	-1.21143	0.864594	2
>tr|D4A3V5|D4A3V5_RAT Similar to KIAA1749 protein (Predicted), isoform CRA_a OS	0.926793	0.982504	1	-0.239624	1.01785	1	0.698401	1.0161	1	2.60996	0.165236	1
>tr|D4A412|D4A412_RAT Uncharacterized protein OS	-0.00785259	1.00405	2	-0.428578	1.01357	2	-0.669005	1.01071	2	-0.534441	1.03225	2
>tr|D4A4B1|D4A4B1_RAT Mitochondrial ribosomal protein L15 (Predicted), isoform CRA_b OS	-0.781576	1.00927	1	0.337941	1.01331	1	0.647799	1.01672	1	-0.525252	1.03228	1
>tr|D4A4G9|D4A4G9_RAT Uncharacterized protein OS	-0.0133429	1.00516	2	-0.876697	0.987092	2	-0.814304	0.987654	2	0.0545199	1.00673	2
>tr|D4A4M0|D4A4M0_RAT Uncharacterized protein OS	-0.218117	1.01893	1	0.335966	1.01285	1	0.00438386	1.00081	1	-0.86169	0.979077	1
>tr|D4A4S3|D4A4S3_RAT Uncharacterized protein OS	-0.729768	1.01181	20	-0.182572	1.01932	20	0.0155542	1.00176	20	-0.632119	1.01704	20
>tr|D4A4T8|D4A4T8_RAT Uncharacterized protein OS	1.84213	0.707607	1	1.87504	0.611534	1	0.502383	1.00567	1	0.0211857	1.00538	1
>tr|D4A4X4|D4A4X4_RAT Uncharacterized protein OS	-0.131223	1.01949	13	0.0676312	0.997445	13	0.508417	1.00888	13	0.948514	0.973456	13
>tr|D4A565|D4A565_RAT NADH dehydrogenase (Ubiquinone) 1 beta subcomplex, 5 (Predicted), isoform CRA_b OS	-0.143111	1.02216	3	0.731737	0.995416	3	-0.0712376	0.992658	3	-1.943	0.515089	3
>tr|D4A567|D4A567_RAT Uncharacterized protein OS	0.485434	1.03045	1	-1.29899	0.861417	1	-1.72217	0.858837	1	-0.0218883	1.00671	1
>tr|D4A575|D4A575_RAT Solute carrier family 25 (Mitochondrial carrier; ornithine transporter) member 15 OS	1.79417	0.725238	7	1.34356	0.859434	7	0.111022	0.992142	7	-0.908303	0.971509	7
>tr|D4A5F2|D4A5F2_RAT Uncharacterized protein OS	-0.150919	1.02434	1	0.722167	0.991439	1	0.39105	1.01281	1	-0.552994	1.02653	1
>tr|D4A5G0|D4A5G0_RAT Uncharacterized protein OS	0.384077	1.02233	3	0.475932	1.01533	3	-0.0803335	0.992753	3	-0.433941	1.01781	3
>tr|D4A5H3|D4A5H3_RAT Uncharacterized protein OS	-0.115873	1.01585	1	0.487745	1.01257	1	0.632705	1.02363	1	0.0600459	1.00601	1
>tr|D4A5L9|D4A5L9_RAT Uncharacterized protein OS	0.0486677	1.03075	8	-0.0739395	0.995924	8	1.67646	0.988643	8	2.62794	0.75441	8
>tr|D4A5Q9|D4A5Q9_RAT Glycine decarboxylase (Predicted), isoform CRA_a OS	-2.19174	0.559178	7	-2.06049	0.469412	7	-0.537814	1.01688	7	0.546478	1.02772	7
>tr|D4A5X1|D4A5X1_RAT Stromal interaction molecule 2 (Predicted) OS	-2.40885	0.407216	1	-0.889599	0.981207	1	2.17061	0.547372	1	1.89375	0.540632	1
>tr|D4A6G6|D4A6G6_RAT Uncharacterized protein OS	0.0424964	1.00373	11	-0.931322	0.970772	11	-0.123231	1.01213	11	2.12281	0.777084	11
>tr|D4A6N6|D4A6N6_RAT Uncharacterized protein OS	0.98813	0.982332	1	-1.26508	0.86589	1	-3.97485	0.00880823	1	-3.2879	0.0304646	1
>tr|D4A6W6|D4A6W6_RAT Uncharacterized protein OS	0.585071	1.02299	7	-0.830963	0.992695	7	-0.696349	1.01486	7	0.776938	1.0114	7
>tr|D4A6X7|D4A6X7_RAT RCG50172, isoform CRA_b OS	0.599593	1.01986	1	-0.42363	1.0126	1	-0.722575	1.00411	1	0.274182	1.00246	1
>tr|D4A7F9|D4A7F9_RAT Glyceraldehyde-3-phosphate dehydrogenase OS				-1.1127	0.934622	1
>tr|D4A7L4|D4A7L4_RAT NADH dehydrogenase (Ubiquinone) 1 beta subcomplex, 11 (Predicted) OS	0.703576	1.02144	1	-0.168712	1.0135	1	-0.43762	1.02365	1	0.516683	1.02517	1
>tr|D4A830|D4A830_RAT Uncharacterized protein OS	0.464746	1.03514	1	0.609358	1.00401	1	0.608081	1.01393	1	0.55419	1.02844	1
>tr|D4A837|D4A837_RAT DNA ligase OS	1.46167	0.868236	1	-1.18143	0.895052	1	-1.22341	1.03343	1	1.80963	0.582932	1
>tr|D4A867|D4A867_RAT Uncharacterized protein OS	-0.380245	1.01484	4	0.561696	1.00854	4	0.841416	0.987232	4	0.108022	1.00699	4
>tr|D4A890|D4A890_RAT Uncharacterized protein OS	0.911426	0.991498	1	0.536446	1.01132	1	-0.456775	1.01972	1	-0.475065	1.02365	1
>tr|D4A896|D4A896_RAT RCG64565 OS	-0.403191	1.03553	1	-0.869065	0.990193	1	-0.180812	0.999062	1	0.644272	1.01383	1
>tr|D4A8D5|D4A8D5_RAT Filamin, beta (Predicted) OS	0.287765	1.013	25	0.124823	1.00274	25	0.00265967	1.00034	25	0.0335072	1.00611	25
>tr|D4A8N1|D4A8N1_RAT RCG32280, isoform CRA_e OS	1.37733	0.881485	1	0.751217	1.00627	1	0.789076	0.987697	1	1.52821	0.738749	1
>tr|D4A8P1|D4A8P1_RAT Uncharacterized protein OS	1.76407	0.738789	1	-0.156592	1.00841	1	-1.17323	1.02996	1	0.171822	1.0039	1
>tr|D4A9A0|D4A9A0_RAT Uncharacterized protein OS	-0.374933	1.0161	1	1.16482	0.897875	1	1.66467	0.89177	1	0.253871	1.00273	1
>tr|D4A9A3|D4A9A3_RAT Uncharacterized protein OS	-0.408635	1.03611	8	-0.672164	0.996989	8	-0.90468	0.992523	8	-1.26142	0.864847	8
>tr|D4A9A6|D4A9A6_RAT Uncharacterized protein OS	0.667299	1.02277	1	-0.959182	0.983542	1	-1.66756	0.896665	1	-0.26008	1.00214	1
>tr|D4A9D6|D4A9D6_RAT DEAH (Asp-Glu-Ala-His) box polypeptide 9 (Predicted) OS	-0.133779	1.01929	6	-0.50165	1.01238	5	-0.189342	1.00131	6	0.50926	1.02646	6
>tr|D4A9N5|D4A9N5_RAT Uncharacterized protein OS	0.785906	1.01333	2	-0.857766	0.989402	2	-1.66561	0.900315	2	-0.740789	1.02493	2
>tr|D4A9Q3|D4A9Q3_RAT Uncharacterized protein OS	1.11869	0.946641	3	0.181474	1.01528	3	-0.238912	1.00455	3	0.605127	1.02103	3
>tr|D4AA08|D4AA08_RAT Uncharacterized protein OS	1.48253	0.856105	3	-0.118157	0.997972	3	-0.618491	1.02703	3	0.781787	1.00911	3
>tr|D4AA25|D4AA25_RAT Adaptor-related protein complex 3, beta 1 subunit (Predicted), isoform CRA_a OS	0.146564	1.02401	2	0.3664	1.01402	2	0.113675	0.991844	2	-0.28819	1.00615	2
>tr|D4AAB4|D4AAB4_RAT Uncharacterized protein OS	2.73751	0.24379	1	-1.99609	0.521723	1	-2.032	0.617495	1	3.73513	0.00952179	1
>tr|D4AAI8|D4AAI8_RAT RCG52844 OS	-0.489407	1.02992	1	1.89444	0.595945	1	-0.642988	1.01915	1	-3.0203	0.0759443	1
>tr|D4AAJ9|D4AAJ9_RAT Uncharacterized protein OS	0.434989	1.03738	1	-0.567282	1.00929	1	-1.22861	1.04224	1	-0.518476	1.02626	1
>tr|D4AAV1|D4AAV1_RAT Uncharacterized protein OS	0.463386	1.03369	1	2.68088	0.191604	1	2.14673	0.562293	1	-0.381327	1.0076	1
>tr|D4AAX0|D4AAX0_RAT Uncharacterized protein OS	0.618685	1.02278	1	-0.516035	1.01073	1	-1.31458	1.01572	1	-0.502486	1.02177	1
>tr|D4AAY0|D4AAY0_RAT Uncharacterized protein OS	-0.862124	1.00907	1	-0.997862	0.966615	1	0.259105	1.0051	1	0.945473	0.972753	1
>tr|D4AB01|D4AB01_RAT Histidine triad nucleotide binding protein 2 (Predicted), isoform CRA_a OS	0.552353	1.01963	1	0.18951	1.02012	1	-0.0315954	1.00064	1	0.300185	1.00714	1
>tr|D4ABB3|D4ABB3_RAT Uncharacterized protein OS	0.682168	1.02369	1	-0.341995	1.01244	1	-1.15592	1.03544	1	-0.468966	1.02558	1
>tr|D4ABH6|D4ABH6_RAT Uncharacterized protein OS	-2.3029	0.463218	22	0.45703	1.01176	22	1.08569	1.01211	22	-0.978025	0.956503	22
>tr|D4AC23|D4AC23_RAT RCG55994, isoform CRA_c OS	0.576179	1.01929	6	-1.70545	0.728442	6	-1.63656	0.918892	6	0.643821	1.01197	6
>tr|D4AC36|D4AC36_RAT Uncharacterized protein OS	1.0931	0.945368	2	-2.8364	0.165739	2	-0.420623	1.02236	2	7.17733	1.07998e-06	2
>tr|D4ACB8|D4ACB8_RAT Chaperonin subunit 8 (Theta) (Predicted), isoform CRA_a OS	-0.145324	1.02157	11	-1.07141	0.952323	11	-1.10255	1.00544	11	-0.316396	1.0114	11
>tr|D4ACG2|D4ACG2_RAT IlvB (Bacterial acetolactate synthase)-like (Predicted), isoform CRA_c OS	-0.0350096	1.00614	1	-0.679225	0.999977	1	-0.417118	1.02054	1	0.343993	1.01272	1
>tr|D4ACJ1|D4ACJ1_RAT 40S ribosomal protein S24 OS	0.953399	0.987721	2	-0.630566	1.00719	2	-0.542467	1.01194	2	1.1976	0.852867	2
>tr|D4ACL3|D4ACL3_RAT Uncharacterized protein OS	-0.538115	1.0227	1	-0.827583	0.993008	1	-0.0858245	0.993958	1	0.482171	1.02159	1
>tr|D4ACW1|D4ACW1_RAT Uncharacterized protein OS	0.000523647	1.00079	2	-0.472316	1.01362	2	-0.547184	1.01279	2	-0.181517	1.00439	2
>tr|D4AD84|D4AD84_RAT Uncharacterized protein OS	0.514287	1.0277	1	0.0718844	0.993875	1	0.657791	1.00771	1	1.06833	0.921359	1
>tr|D4ADA8|D4ADA8_RAT Uncharacterized protein OS	1.3827	0.88972	1	-0.59009	1.00988	1	-1.73196	0.857056	1	-0.25932	0.999776	1
>tr|D4ADC3|D4ADC3_RAT Uncharacterized protein OS	1.34421	0.902035	2	-0.0391659	0.996812	2	-0.753742	1.00045	2	0.31904	1.0129	2
>tr|D4ADE8|D4ADE8_RAT Uncharacterized protein OS	-0.134428	1.02082	1	0.0850193	0.997342	1	0.228487	1.00235	1	0.0474611	1.00613	1
>tr|D4ADG2|D4ADG2_RAT RCG34648 OS	0.626815	1.02083	2	0.672636	0.999961	2	0.138625	0.999812	2	-0.266097	1.00096	2
>tr|D4ADJ1|D4ADJ1_RAT RCG64191 OS	1.43832	0.875593	1	-0.124592	1.00294	1	-1.58222	0.9424	1	-0.60193	1.02148	1
>tr|D4ADS4|D4ADS4_RAT RCG46430 OS	2.4155	0.399854	3	1.30642	0.86863	3	-0.463701	1.01781	3	-0.892752	0.969682	3
>tr|D4AE04|D4AE04_RAT Uncharacterized protein OS	0.189007	1.02481	5	0.970963	0.973139	5	0.567082	1.01631	5	-0.629906	1.01262	5
>tr|D4AE09|D4AE09_RAT Cytochrome P450, family 39, subfamily a, polypeptide 1 (Predicted), isoform CRA_a OS	0.46767	1.03784	1	0.9366	0.968056	1	0.295593	1.00891	1	-0.486358	1.0188	1
>tr|D4AE10|D4AE10_RAT Uncharacterized protein OS	-3.54383	0.0931812	1	-2.67618	0.194313	1	0.278628	1.00566	1	0.202592	1.00536	1
>tr|D4AE56|D4AE56_RAT Prostaglandin E synthase 2 (Predicted), isoform CRA_b OS	0.188657	1.02291	1	0.261869	1.01612	1	0.10885	0.989381	1	-0.0271576	1.00431	1
>tr|D4AEH9|D4AEH9_RAT Amylo-1, 6-glucosidase, 4-alpha-glucanotransferase	-0.327601	1.02525	2	1.0687	0.956409	2	1.39862	1.00493	2	0.217125	1.00437	2
>tr|D4AEI1|D4AEI1_RAT Uncharacterized protein OS	-0.738418	1.00964	1	-1.15695	0.905651	1	-0.478988	1.01236	1	0.165566	1.00245	1
>tr|D4N6R6|D4N6R6_MUSMC Beta-globin OS	-0.265159	1.01484	1				0.0247977	0.998641	1	2.43191	0.239131	1
>tr|E9PSQ6|E9PSQ6_RAT Uncharacterized protein OS	1.26654	0.932965	1	-0.0219543	0.99681	1	-0.491915	1.0046	1	0.881442	0.976151	1
>tr|E9PST5|E9PST5_RAT Uncharacterized protein OS	1.5117	0.860674	3	-0.0642433	0.995887	3	-1.06211	1.01427	3	-0.153155	1.00233	3
>tr|E9PSW5|E9PSW5_RAT Uncharacterized protein OS	0.166999	1.02401	4	0.633171	1.0074	4	0.417366	1.02026	4	-0.37827	1.00641	4
>tr|E9PT13|E9PT13_RAT Uncharacterized protein OS	-0.847116	0.999273	1	-0.342882	1.01152	1	0.121745	0.996905	1	-0.404817	1.0049	1
>tr|E9PT29|E9PT29_RAT Uncharacterized protein OS	-0.621472	1.02282	4	-0.556439	1.00323	4	0.26666	1.00714	4	0.831042	0.9884	4
>tr|E9PTK8|E9PTK8_RAT Uncharacterized protein OS	0.333777	1.02308	1	-0.468503	1.01506	1	-1.56915	0.943338	1	-1.43777	0.788416	1
>tr|E9PTW0|E9PTW0_RAT Uncharacterized protein OS	-1.51543	0.864772	1	-2.63067	0.206249	1	-0.228498	1.00461	1	2.02752	0.461311	1
>tr|E9PU16|E9PU16_RAT Uncharacterized protein OS	1.38234	0.890323	1	0.403249	1.01766	1	0.315233	1.00716	1	1.16102	0.878647	1
>tr|E9PU34|E9PU34_RAT Uncharacterized protein OS	0.619806	1.02492	1	0.801928	1.01398	1	-0.225963	1.00249	1	-0.885598	0.975007	1
>tr|E9PU58|E9PU58_RAT Uncharacterized protein OS	0.460861	1.0366	5	-0.259194	1.01642	5	1.18305	0.996102	5	4.2148	0.645563	5
>tr|E9PVN9|E9PVN9_MOUSE Uncharacterized protein OS	0.902447	0.99137	1	0.832094	0.995506	1	-0.173538	0.999988	1	-0.523828	1.0307	1
>tr|E9PX31|E9PX31_MOUSE Uncharacterized protein OS	-3.304	0.12127	1	-0.698421	0.999761	1	2.1542	0.551864	1	0.662092	1.01708	1
>tr|E9Q5U3|E9Q5U3_MOUSE Glyceraldehyde-3-phosphate dehydrogenase OS	1.763	0.740506	1	1.05885	0.952261	1	0.467428	1.01656	1	1.0732	0.919767	1
>tr|F1LM52|F1LM52_RAT Uncharacterized protein (Fragment) OS	-0.615034	1.02031	1	0.108445	0.997896	1	-0.513059	1.00966	1	-1.34696	0.823537	1
>tr|F1LM63|F1LM63_RAT Uncharacterized protein OS	0.101335	1.01299	6	0.586314	1.00899	6	0.624618	1.02656	6	0.320456	1.01314	6
>tr|F1LM66|F1LM66_RAT Uncharacterized protein OS	1.90784	0.66647	9	0.386468	1.01794	9	-0.54082	1.01068	9	0.0423823	1.00583	9
>tr|F1LMA9|F1LMA9_RAT Uncharacterized protein (Fragment) OS	-0.115564	1.01406	1	-0.367665	1.01527	1	0.563275	1.01425	1	1.37292	0.823043	1
>tr|F1LMB4|F1LMB4_RAT Uncharacterized protein (Fragment) OS	-0.399091	1.03162	2	-1.08219	0.941842	2	-0.494538	1.00761	2	0.562518	1.02395	2
>tr|F1LMI1|F1LMI1_RAT Uncharacterized protein (Fragment) OS	0.492506	1.02939	1	-0.0292179	0.995164	1	-0.687826	1.01303	1	-0.462487	1.02795	1
>tr|F1LMV6|F1LMV6_RAT Uncharacterized protein OS	0.370721	1.01532	4	0.789511	1.01239	4	0.321202	1.00607	4	-0.313899	1.00894	4
>tr|F1LN88|F1LN88_RAT Uncharacterized protein OS	0.109467	1.01467	1	1.34585	0.863323	1	1.20422	1.03785	1	-0.186919	1.00816	1
>tr|F1LNB8|F1LNB8_RAT Uncharacterized protein OS	-0.471764	1.03716	1	-0.480162	1.01245	1	-0.405842	1.01511	1	-0.538933	1.03016	1
>tr|F1LNC1|F1LNC1_RAT Uncharacterized protein (Fragment) OS	-0.10323	1.01336	1	0.424481	1.01167	1	0.694452	1.01344	1	0.277485	1.00158	1
>tr|F1LNF1|F1LNF1_RAT Uncharacterized protein (Fragment) OS	-0.660459	1.02163	1	-1.05148	0.95768	1	3.45611	0.037129	1	6.73413	3.82602e-09	1
>tr|F1LNJ2|F1LNJ2_RAT Uncharacterized protein OS	2.54001	0.316113	11	0.0249201	0.996225	11	-1.08535	1.00589	11	0.0998043	1.00598	11
>tr|F1LP27|F1LP27_RAT Uncharacterized protein OS	-0.709552	1.02142	2	-0.390103	1.0158	2	-0.234749	1.00472	2	-0.941785	0.973002	2
>tr|F1LP50|F1LP50_RAT Uncharacterized protein (Fragment) OS	1.76402	0.738866	1	-0.826076	0.995088	1	-1.4603	0.977	1	1.12272	0.896138	1
>tr|F1LPW0|F1LPW0_RAT Uncharacterized protein (Fragment) OS	0.56253	1.01823	4	-3.67818	0.0230755	4	-3.57632	0.025755	4	0.363975	1.01006	4
>tr|F1LQ93|F1LQ93_RAT Uncharacterized protein OS	0.0865938	1.01041	1	-0.0650089	0.995247	1	0.137527	0.996654	1	0.434053	1.02057	1
>tr|F1LQE4|F1LQE4_RAT Uncharacterized protein (Fragment) OS	-0.319237	1.01869	1	-1.09969	0.940566	1	-0.0159144	1.00147	1	1.15994	0.876364	1
>tr|F1LQL3|F1LQL3_RAT Uncharacterized protein (Fragment) OS	0.705087	1.02338	7	-1.27861	0.867508	7	-1.15063	1.03916	7	0.760922	1.0232	7
>tr|F1LQS0|F1LQS0_RAT Uncharacterized protein OS	1.26152	0.93346	1	-0.114169	0.997506	1	-0.905384	0.991511	1	0.286634	1.00529	1
>tr|F1LQS6|F1LQS6_RAT Uncharacterized protein (Fragment) OS	0.311978	1.01534	1	0.0295963	0.996681	1	0.18272	0.998749	1	0.625829	1.01058	1
>tr|F1LQW3|F1LQW3_RAT Uncharacterized protein (Fragment) OS	-0.859988	1.00424	10	-2.17195	0.412109	10	-1.27441	1.01321	10	1.21684	1.00309	10
>tr|F1LR10|F1LR10_RAT Uncharacterized protein OS	0.500572	1.0282	2	-0.295461	1.01662	2	-0.34694	1.00917	2	0.487387	1.02273	2
>tr|F1LRA1|F1LRA1_RAT Uncharacterized protein OS	0.996615	0.97513	1	0.416015	1.01276	1	-0.432103	1.02207	1	-0.0913978	1.00785	1
>tr|F1LRK8|F1LRK8_RAT Uncharacterized protein OS	-0.452033	1.03973	1	-0.314796	1.01156	1	0.20789	1.00164	1	0.25919	0.999902	1
>tr|F1LS05|F1LS05_RAT Uncharacterized protein (Fragment) OS	-2.29072	0.466081	1	-1.32633	0.861726	1	0.284886	1.0115	1	-0.410019	1.00474	1
>tr|F1LSH7|F1LSH7_RAT Uncharacterized protein OS	-0.75202	1.009	1	-0.0201221	0.996476	1	0.857332	0.998729	1	0.439793	1.02582	1
>tr|F1LT35|F1LT35_RAT Uncharacterized protein (Fragment) OS	-1.23708	0.940409	6	-1.53269	0.792946	6	-0.83975	0.985052	6	-0.160561	1.00272	6
>tr|F1LT69|F1LT69_RAT Aldehyde dehydrogenase (Fragment) OS	-0.150185	1.02285	1	1.43213	0.846725	1	1.62278	0.929719	1	0.0642965	1.00636	1
>tr|F1LTJ2|F1LTJ2_RAT Uncharacterized protein (Fragment) OS	-1.16328	0.952373	1	-1.1996	0.894395	1	-0.352137	1.00892	1	-0.124306	1.00504	1
>tr|F1LTV2|F1LTV2_RAT Glyceraldehyde-3-phosphate dehydrogenase (Fragment) OS	-1.63342	0.806361	1	3.27486	0.0653869	1	7.8282	7.94298e-12	1	4.92056	0.000107803	1
>tr|F1LU06|F1LU06_RAT Uncharacterized protein (Fragment) OS	0.394468	1.0302	1	0.819016	0.999041	1	-0.082811	0.992606	1	-0.854046	0.985125	1
>tr|F1LU48|F1LU48_RAT Uncharacterized protein (Fragment) OS	0.723697	1.01192	2	-0.275362	1.01449	2	0.280865	1.00824	2	1.92457	0.518569	2
>tr|F1LU57|F1LU57_RAT Uncharacterized protein (Fragment) OS	0.763463	1.01145	1	0.372931	1.01837	1	-0.325265	1.01029	1	-0.295437	1.00539	1
>tr|F1LU71|F1LU71_RAT Uncharacterized protein (Fragment) OS	-1.65729	0.794083	12	-0.195972	1.01844	12	0.573551	1.01629	12	-0.00648828	1.00099	12
>tr|F1LUT2|F1LUT2_RAT Uncharacterized protein (Fragment) OS	-0.00726417	1.0033	1	0.225158	1.01742	1	-0.282436	1.00668	1	-0.919663	0.976443	1
>tr|F1LV61|F1LV61_RAT Uncharacterized protein (Fragment) OS	-1.72377	0.749604	1	-1.67197	0.734255	1	-0.995377	0.9897	1	-1.21812	0.860909	1
>tr|F1LVK5|F1LVK5_RAT Uncharacterized protein (Fragment) OS	1.37387	0.887092	1	0.320363	1.01158	1	-1.90342	0.7296	1	-1.95169	0.50478	1
>tr|F1LW00|F1LW00_RAT Uncharacterized protein (Fragment) OS	-0.560118	1.01787	1	0.148529	1.00809	1	1.05602	1.0109	1	0.732954	1.0257	1
>tr|F1LW12|F1LW12_RAT Uncharacterized protein (Fragment) OS	-2.2741	0.468842	1	-2.24494	0.350588	1	-0.063308	0.992876	1	0.644078	1.01407	1
>tr|F1LW74|F1LW74_RAT Uncharacterized protein (Fragment) OS	-0.811492	1.00562	12	0.0494608	0.996349	12	0.67395	1.01441	12	0.509832	1.02579	12
>tr|F1LWF9|F1LWF9_RAT Uncharacterized protein (Fragment) OS	-0.770402	1.01041	2	0.772816	1.00988	2	1.0032	0.97237	2	-0.19143	1.00765	2
>tr|F1LWL5|F1LWL5_RAT Uncharacterized protein (Fragment) OS	-0.32194	1.02433	1	0.0558699	0.994759	1	-0.187365	1.00097	1	-0.773671	1.01587	1
>tr|F1LWU5|F1LWU5_RAT Uncharacterized protein (Fragment) OS	0.672121	1.02029	1	1.55771	0.803364	1	0.724704	1.00395	1	-0.572214	1.02117	1
>tr|F1LWX1|F1LWX1_RAT Uncharacterized protein (Fragment) OS	0.34861	1.0187	3	-0.890581	0.979822	3	-1.13561	1.01822	3	-0.166504	1.00445	3
>tr|F1LX07|F1LX07_RAT Uncharacterized protein (Fragment) OS	-2.17188	0.555021	1	-1.02401	0.95644	1	0.23275	1.00511	1	-0.818783	0.991961	1
>tr|F1LX42|F1LX42_RAT Uncharacterized protein (Fragment) OS	1.06349	0.964748	1	1.57503	0.788796	1	0.593319	1.01025	1	-0.288166	1.00618	1
>tr|F1LXA0|F1LXA0_RAT Uncharacterized protein (Fragment) OS	1.72419	0.761146	1	0.32218	1.01382	1	-1.03458	0.994318	1	-0.395266	1.00344	1
>tr|F1LXC6|F1LXC6_RAT Uncharacterized protein (Fragment) OS	-0.252964	1.01277	1	-0.141297	1.0084	1	0.378964	1.00957	1	0.488229	1.02176	1
>tr|F1LXF4|F1LXF4_RAT Uncharacterized protein (Fragment) OS	0.837501	0.996141	1	0.939765	0.971615	1	-0.381024	1.01005	1	-1.12239	0.890971	1
>tr|F1LXQ1|F1LXQ1_RAT Uncharacterized protein (Fragment) OS	0.699296	1.01797	1	0.828642	0.995903	1	0.574043	1.01907	1	0.430225	1.01239	1
>tr|F1LY44|F1LY44_RAT Uncharacterized protein (Fragment) OS	0.322485	1.02631	3	-0.727674	0.994359	3	-0.860225	1.00252	3	-0.0146688	1.00249	3
>tr|F1LY85|F1LY85_RAT Uncharacterized protein (Fragment) OS	1.14448	0.940344	1	1.33369	0.857608	1	0.253269	1.00533	1	-0.316877	1.01091	1
>tr|F1LYH5|F1LYH5_RAT Uncharacterized protein (Fragment) OS	-0.319894	1.02053	1	0.556867	1.00482	1	0.834575	0.983284	1	0.0146791	1.00437	1
>tr|F1LYI5|F1LYI5_RAT Uncharacterized protein (Fragment) OS				-1.28517	0.857584	1
>tr|F1LZ05|F1LZ05_RAT Uncharacterized protein (Fragment) OS	2.46847	0.367931	1	-0.172827	1.0154	1	-1.4456	0.98015	1	1.18189	0.86974	1
>tr|F1LZ34|F1LZ34_RAT Uncharacterized protein (Fragment) OS	-1.52909	0.841957	1	-0.0998036	0.998853	1	1.10752	1.01132	1	-0.109841	1.0054	1
>tr|F1LZW6|F1LZW6_RAT Uncharacterized protein (Fragment) OS	-0.183118	1.02293	35	0.704315	1.00083	35	0.326637	1.00888	35	-1.44017	0.792532	35
>tr|F1M062|F1M062_RAT Uncharacterized protein (Fragment) OS	0.412061	1.03515	1	-0.698661	0.999451	1	-1.5406	0.974121	1	-0.871457	0.974665	1
>tr|F1M0J2|F1M0J2_RAT Uncharacterized protein (Fragment) OS	0.792652	1.01707	1	0.135518	1.00674	1	-1.44962	0.984728	1	-1.64675	0.6657	1
>tr|F1M0N7|F1M0N7_RAT Uncharacterized protein (Fragment) OS	-1.92035	0.656964	1	-1.6941	0.721101	1	-0.600792	1.01251	1	-0.783187	1.01154	1
>tr|F1M0S3|F1M0S3_RAT Uncharacterized protein (Fragment) OS	0.737234	1.00721	1	0.209358	1.01758	1	-0.117492	0.994548	1	0.431113	1.01426	1
>tr|F1M0V4|F1M0V4_RAT Uncharacterized protein (Fragment) OS	2.79862	0.229421	1	0.261699	1.01628	1	-1.86481	0.743745	1	0.0812442	1.01121	1
>tr|F1M0Y0|F1M0Y0_RAT Uncharacterized protein (Fragment) OS	-0.647023	1.02164	2	-0.0445295	0.996095	2	0.530648	1.00681	2	0.148888	1.00195	2
>tr|F1M291|F1M291_RAT Uncharacterized protein (Fragment) OS	0.60228	1.02459	1	0.738622	1.00056	1	0.366988	1.01077	1	0.13856	1.00489	1
>tr|F1M2C9|F1M2C9_RAT Uncharacterized protein (Fragment) OS	-0.109193	1.01287	1	0.780943	1.01421	1	0.557332	1.01152	1	-0.391185	1.00512	1
>tr|F1M2K7|F1M2K7_RAT Enolase (Fragment) OS	-1.14544	0.945246	1	0.562335	1.00777	1	1.5145	0.982395	1	0.000951865	0.999856	1
>tr|F1M2L5|F1M2L5_RAT L-lactate dehydrogenase (Fragment) OS	-0.0508112	1.00505	1	0.82038	0.997157	1	0.645346	1.01984	1	-0.414049	1.00404	1
>tr|F1M2N1|F1M2N1_RAT Uncharacterized protein (Fragment) OS	1.19405	0.961214	1	1.32212	0.861026	1	0.267476	1.00871	1	-0.21592	1.00401	1
>tr|F1M2P3|F1M2P3_RAT Uncharacterized protein (Fragment) OS	-1.49739	0.841363	1	-1.62987	0.755376	1	-0.296768	1.00773	1	0.247365	1.00439	1
>tr|F1M2Q8|F1M2Q8_RAT Uncharacterized protein (Fragment) OS	-1.029	0.980374	1	0.347444	1.01181	1	4.64867	0.0320165	1	4.54355	0.000561433	1
>tr|F1M352|F1M352_RAT Uncharacterized protein (Fragment) OS	-0.136199	1.01922	1	-1.26504	0.865947	1	-0.983052	0.97855	1	0.345284	1.01137	1
>tr|F1M3E3|F1M3E3_RAT Uncharacterized protein (Fragment) OS	-0.122954	1.01853	1	0.454777	1.01429	1	0.0683753	0.992487	1	-0.60706	1.02216	1
>tr|F1M3H8|F1M3H8_RAT Uncharacterized protein (Fragment) OS	-0.39943	1.03405	2	-0.318454	1.0119	2	-0.623272	1.02462	2	-1.07006	0.924352	2
>tr|F1M3M1|F1M3M1_RAT Uncharacterized protein (Fragment) OS	-0.880077	0.997714	1	0.181706	1.01651	1	-0.109531	0.990776	1	-1.64902	0.662587	1
>tr|F1M3Q4|F1M3Q4_RAT Uncharacterized protein (Fragment) OS	1.03183	0.981848	1	0.151423	1.01032	1	-0.705773	1.01431	1	-0.0650654	1.00571	1
>tr|F1M3S4|F1M3S4_RAT Uncharacterized protein (Fragment) OS	-0.790421	1.01144	1	-1.96364	0.541084	1	-1.51263	0.985991	1	-0.265597	1.00144	1
>tr|F1M449|F1M449_RAT Histone H4 (Fragment) OS	0.0187743	1.00694	2	-1.54515	0.794778	2	-1.13356	1.02163	2	0.716569	1.02559	2
>tr|F1M455|F1M455_RAT Uncharacterized protein (Fragment) OS	-0.59731	1.02269	1	0.137908	1.00665	1	1.14802	1.03832	1	0.816338	0.988009	1
>tr|F1M4A0|F1M4A0_RAT Uncharacterized protein (Fragment) OS	-0.630696	1.0195	5	-0.701408	0.999616	5	-0.506263	1.00728	5	-0.433935	1.01781	5
>tr|F1M5A9|F1M5A9_RAT Uncharacterized protein (Fragment) OS	0.434961	1.03448	2	-0.399458	1.01728	2	-0.708613	1.01058	2	-0.0432038	1.00644	2
>tr|F1M5C6|F1M5C6_RAT Uncharacterized protein (Fragment) OS	0.369735	1.01462	1	-1.02829	0.9573	1	-1.52039	0.984902	1	-0.31636	1.01144	1
>tr|F1M5J7|F1M5J7_RAT Uncharacterized protein (Fragment) OS	-0.165189	1.02569	1	0.564563	1.00936	1	1.11449	1.00938	1	0.651633	1.01552	1
>tr|F1M5L7|F1M5L7_RAT Uncharacterized protein (Fragment) OS	-0.385743	1.02505	3	-0.0442967	0.996286	3	0.395938	1.01117	3	0.523905	1.03061	3
>tr|F1M5T6|F1M5T6_RAT Uncharacterized protein (Fragment) OS	0.551732	1.01713	1	-0.371217	1.01497	1	-1.02086	0.989515	1	-0.364408	1.01137	1
>tr|F1M5X1|F1M5X1_RAT Uncharacterized protein (Fragment) OS	-1.06951	0.961472	19	-1.36555	0.857839	18	-1.27173	1.01797	19	-1.75432	0.608054	19
>tr|F1M5Z1|F1M5Z1_RAT Uncharacterized protein (Fragment) OS	1.72176	0.752814	1	1.5074	0.802744	1	0.726967	1.01164	1	0.92517	0.980137	1
>tr|F1M6A4|F1M6A4_RAT Uncharacterized protein (Fragment) OS	-0.0977007	1.01414	8	1.38202	0.847517	8	1.10001	1.00268	8	-0.711489	1.02149	8
>tr|F1M6D1|F1M6D1_RAT Uncharacterized protein (Fragment) OS	1.14664	0.949849	1	0.150314	1.00924	1	-0.940861	0.97892	1	-0.609207	1.01949	1
>tr|F1M6F4|F1M6F4_RAT Uncharacterized protein (Fragment) OS	1.01304	0.974356	1	0.199079	1.02066	1	-0.344784	1.00883	1	0.324484	1.01408	1
>tr|F1M6G3|F1M6G3_RAT Uncharacterized protein (Fragment) OS	-0.490887	1.03128	1	-1.02646	0.956403	1	0.196692	1.00106	1	1.46537	0.780936	1
>tr|F1M7H9|F1M7H9_RAT Uncharacterized protein (Fragment) OS	1.09133	0.94804	1	3.17283	0.0840355	1	2.37967	0.391328	1	0.0805903	1.01178	1
>tr|F1M7N8|F1M7N8_RAT Uncharacterized protein OS	0.841988	1.00191	1	-0.119676	0.998622	1	-0.567696	1.01557	1	0.398435	1.00544	1
>tr|F1M7Z3|F1M7Z3_RAT Uncharacterized protein (Fragment) OS	-0.169628	1.02596	1	-0.171328	1.01322	1	-0.617298	1.02131	1	-1.01739	0.943165	1
>tr|F1M853|F1M853_RAT Uncharacterized protein (Fragment) OS				-0.335426	1.01092	1
>tr|F1M865|F1M865_RAT Uncharacterized protein (Fragment) OS	-0.335438	1.02392	1	-0.00148971	0.99941	1	0.387697	1.0137	1	0.176652	1.00452	1
>tr|F1M8D1|F1M8D1_RAT Uncharacterized protein (Fragment) OS	0.668384	1.02136	2	-0.840842	0.987782	2	-2.11377	0.591092	2	-1.81902	0.579836	2
>tr|F1M8Z8|F1M8Z8_RAT Uncharacterized protein (Fragment) OS	0.0760569	1.00695	3	-0.111089	0.997564	3	0.134299	0.996082	3	0.418983	1.00419	3
>tr|F1M953|F1M953_RAT Uncharacterized protein OS	-1.09442	0.949304	1	-0.270793	1.0151	1	0.0226969	0.999097	1	-0.835378	0.986884	1
>tr|F1M983|F1M983_RAT Uncharacterized protein OS	0.319189	1.01624	1	-0.226824	1.01808	1	-0.598787	1.01154	1	-0.230829	1.00723	1
>tr|F1MAB8|F1MAB8_RAT Uncharacterized protein OS	-1.98549	0.62309	1	-0.896941	0.978578	1	1.83084	0.752713	1	1.93426	0.516194	1
>tr|F1MAC7|F1MAC7_RAT Uncharacterized protein OS	-1.97002	0.626166	1	-0.663229	1.00474	1	-0.217727	1.00056	1	-0.711866	1.02369	1
>tr|F1MAE1|F1MAE1_RAT Uncharacterized protein OS	1.40199	0.896158	1	0.686548	1.00275	1	0.943644	0.974897	1	2.30426	0.302119	1
>tr|F1MAP2|F1MAP2_RAT Uncharacterized protein OS	0.702329	1.01399	1	-0.597364	1.00761	1	-0.608887	1.01996	1	0.656172	1.01716	1
>tr|F1MAR6|F1MAR6_RAT Uncharacterized protein OS	-0.730687	1.01059	1	-0.517652	1.01086	1	0.067099	0.993553	1	-0.00682973	1.00258	1
>tr|F2Z3R4|F2Z3R4_RAT Nuclear factor 1 OS	0.0632628	1.00484	1	-0.163668	1.01317	1	-0.047426	0.997764	1	0.263956	1.00305	1
>tr|F2Z3S4|F2Z3S4_RAT Uncharacterized protein (Fragment) OS	-0.600557	1.02096	4	-1.62296	0.756183	4	-0.402156	1.01635	4	1.643	0.670865	4
>tr|F6UX14|F6UX14_MOUSE Uncharacterized protein (Fragment) OS	-0.99957	0.974351	1	-0.470943	1.01518	1	1.07162	1.0123	1	1.20221	0.863931	1
>tr|F6WMQ9|F6WMQ9_MOUSE Uncharacterized protein (Fragment) OS	1.64489	0.798972	1	0.364061	1.01391	1	-0.786888	0.990636	1	0.230354	1.0054	1
>tr|F6Z4C4|F6Z4C4_MOUSE Uncharacterized protein (Fragment) OS	-0.491248	1.03086	1	-0.686122	1.0033	1	2.41761	0.368151	1	4.63918	0.000355036	1
>tr|F8WFK2|F8WFK2_RAT Uncharacterized protein OS	0.530651	1.0252	1	-0.372443	1.01627	1	-0.991964	0.985463	1	-0.452801	1.02396	1
>tr|F8WFW6|F8WFW6_RAT Uncharacterized protein (Fragment) OS	0.654701	1.02285	8	-1.10704	0.937282	8	-1.01599	0.993019	8	1.54894	0.990916	8
>tr|F8WG07|F8WG07_RAT Uncharacterized protein OS	-0.851777	1.00344	1	0.150969	1.01073	1	0.43387	1.023	1	-0.731467	1.02353	1
>tr|O35948|O35948_MOUSE Homolog of human Werners syndrome protein OS	-0.769929	1.01105	1	-0.172472	1.0143	1	0.784806	0.990639	1	0.547378	1.02663	1
>tr|O54725|O54725_RAT NonO/p54nrb homolog (Fragment) OS	0.805777	1.00913	3	-0.768762	1.01262	3	-1.3	1.00573	3	-0.205761	1.00388	3
>tr|O55214|O55214_RAT Ribosomal protein S2 OS	0.468859	1.03646	2	-0.445937	1.01194	2	-0.627778	1.02622	2	0.170973	1.00468	2
>tr|O89035|O89035_RAT Mitochondrial dicarboxylate carrier OS	1.89303	0.679695	7	0.442713	1.00994	7	-0.236022	1.00503	7	-0.0328176	1.00539	7
>tr|Q0VDM9|Q0VDM9_MOUSE Krt78 protein (Fragment) OS				-3.09094	0.100971	2
>tr|Q148B1|Q148B1_MOUSE Cytochrome P450, family 2, subfamily c, polypeptide 65 OS	1.28234	0.933177	1	3.3707	0.0500854	1	1.4286	0.961276	1	-1.68122	0.643484	1
>tr|Q3B8N9|Q3B8N9_RAT Biphenyl hydrolase-like (Serine hydrolase) OS	1.63325	0.806651	6	2.79239	0.171321	6	1.84461	0.745375	6	-0.198966	1.00432	6
>tr|Q3KR94|Q3KR94_RAT Vitronectin OS	-0.0386956	1.00688	3	-0.940833	0.973344	3	-1.73393	0.853448	3	-1.83118	0.573305	3
>tr|Q3KRE2|Q3KRE2_RAT Methyltransferase like 7A OS	2.04405	0.615713	2	1.68397	0.736608	2	0.540838	1.01066	2	0.308017	1.0091	2
>tr|Q3KRF2|Q3KRF2_RAT High density lipoprotein binding protein OS	-0.291239	1.01595	1	0.197453	1.01925	1	-0.617697	1.02441	1	-1.8783	0.553632	1
>tr|Q3MHS9|Q3MHS9_RAT Chaperonin containing Tcp1, subunit 6A (Zeta 1) OS	0.355413	1.01673	7	-1.47083	0.822412	7	-1.4565	0.984091	7	0.42516	1.0095	7
>tr|Q3T1K1|Q3T1K1_RAT LAG1 homolog, ceramide synthase 2 OS	-0.179445	1.02194	1	0.0105363	0.998168	1	0.849534	0.991093	1	1.1376	0.885867	1
>tr|Q3TDX9|Q3TDX9_MOUSE Putative uncharacterized protein OS	0.0132692	1.00521	1	-0.286945	1.01479	1	-0.597521	1.00852	1	-0.521707	1.03106	1
>tr|Q3THB4|Q3THB4_MOUSE L-lactate dehydrogenase OS	1.24096	0.941601	1	1.30295	0.859967	1	0.00183998	0.999762	1	-0.552405	1.02724	1
>tr|Q3TR79|Q3TR79_MOUSE Putative uncharacterized protein OS	0.972279	0.987956	1	1.92318	0.568396	1	1.53927	0.962678	1	0.589919	1.01431	1
>tr|Q3U6A4|Q3U6A4_MOUSE Putative uncharacterized protein OS	-0.790973	1.01502	1	-0.358223	1.01408	1	0.860313	1.0024	1	0.900325	0.96847	1
>tr|Q3UTA8|Q3UTA8_MOUSE Predicted OS	0.406774	1.03534	1	0.945136	0.98202	1	0.103484	0.990035	1	-0.928284	0.97567	1
>tr|Q3V495|Q3V495_MOUSE Uncharacterized protein OS	0.459269	1.03642	1	-0.637277	1.00689	1	-0.793386	0.988905	1	0.346972	1.01481	1
>tr|Q496Z1|Q496Z1_RAT Bicaudal D homolog 2 (Drosophila) OS	0.407534	1.03734	1	0.488201	1.015	1	0.0153741	1.00003	1	-0.287338	1.00459	1
>tr|Q498C9|Q498C9_RAT RCG33491, isoform CRA_b OS	0.31123	1.01363	1	0.244289	1.01637	1	-0.444173	1.02117	1	-0.724647	1.0189	1
>tr|Q498D2|Q498D2_RAT Eukaryotic translation initiation factor 3, subunit 6 interacting protein OS	1.43361	0.874164	1	-0.180838	1.01371	1	-1.63919	0.913929	1	-0.607874	1.02115	1
>tr|Q498D4|Q498D4_RAT Tln1 protein OS	0.398898	1.03183	1	0.0415051	0.994893	1	-0.0758489	0.992652	1	0.313664	1.00752	1
>tr|Q499Q4|Q499Q4_RAT Phosphoglucomutase 1 OS	-0.874738	1.00057	1	0.0935467	0.997119	1	1.60629	0.935901	1	1.34434	0.822758	1
>tr|Q499R7|Q499R7_RAT Ppa1 protein (Fragment) OS	-0.35084	1.01895	3	0.897886	0.981913	3	1.22371	1.03289	3	0.291839	1.00736	3
>tr|Q4KLJ1|Q4KLJ1_RAT RCG61762, isoform CRA_a OS	0.466291	1.03639	4	-0.227218	1.01997	4	1.31345	1.01106	4	0.763139	0.986369	4
>tr|Q4KLK7|Q4KLK7_RAT Nucleolar protein 5A OS	-0.261055	1.01261	14	-0.910947	0.983869	14	-0.134258	0.994754	14	1.41329	0.794707	14
>tr|Q4KM07|Q4KM07_RAT Integral membrane transport protein UST5r OS	1.60843	0.813708	1	-0.149604	1.0085	1	-1.12164	1.01197	1	0.449162	1.02313	1
>tr|Q4KM38|Q4KM38_RAT FUS interacting protein (Serine-arginine rich) 1 OS	1.05374	0.967878	2	-0.448229	1.01596	2	-0.504392	1.00944	2	1.24034	0.863654	2
>tr|Q4KM60|Q4KM60_RAT Ribosomal protein (Fragment) OS				-0.797944	1.00937	7
>tr|Q4QQW7|Q4QQW7_RAT Cytochrome P450, family 2, subfamily c, polypeptide 7 OS	0.313921	1.01583	2	-0.630291	1.0041	2	0.488156	1.00889	2	2.61693	0.165619	2
>tr|Q4R1A4|Q4R1A4_RAT TRK-fused gene protein OS	1.28003	0.929088	1	1.37077	0.85736	1	0.198879	1.00049	1	-0.288523	1.00582	1
>tr|Q4V8I9|Q4V8I9_RAT UDP-glucose pyrophosphorylase 2 OS	0.277182	1.01161	7	1.24303	0.86474	7	1.00099	0.986909	7	-0.0142743	1.00281	7
>tr|Q4V8K6|Q4V8K6_RAT Heterogeneous nuclear ribonucleoprotein C (C1/C2) OS	-0.537705	1.0232	5	-1.52202	0.800627	5	-0.79814	0.996691	5	1.03941	0.934396	5
>tr|Q50HX1|Q50HX1_MOUSE RAB14 protein variant OS	-1.54712	0.8467	1	-0.902735	0.982877	1	-0.1053	0.990452	1	-0.712213	1.02731	1
>tr|Q566E2|Q566E2_RAT Dnajc7 protein OS	0.392722	1.02934	1	1.21898	0.879816	1	0.871668	1.00385	1	-0.10599	1.00672	1
>tr|Q566E4|Q566E4_RAT Heterogeneous nuclear ribonucleoprotein R OS	0.913694	0.991513	1	-0.947021	0.979281	1	-0.919824	0.987373	1	1.10548	0.902427	1
>tr|Q568Y1|Q568Y1_RAT Gas2 protein OS	-0.304679	1.00967	1	-0.761655	1.01812	1	-0.727563	1.01085	1	-0.346663	1.01253	1
>tr|Q571M3|Q571M3_MOUSE MKIAA4018 protein (Fragment) OS	1.6339	0.805575	1	-1.48328	0.814349	1	-2.78072	0.179981	1	0.0929138	1.00789	1
>tr|Q5BJM6|Q5BJM6_RAT Afg3l2 protein OS	0.330495	1.02394	1	0.260802	1.01483	1	0.118369	0.995801	1	0.180946	1.00275	1
>tr|Q5BJN1|Q5BJN1_RAT START domain containing 10, isoform CRA_b OS	0.570511	1.01954	3	1.08532	0.940953	3	1.21897	1.03237	3	0.847467	0.98216	3
>tr|Q5BJZ3|Q5BJZ3_RAT Nicotinamide nucleotide transhydrogenase OS	0.83838	0.997907	21	0.0898709	0.998976	21	-1.29471	1.00555	21	-3.15326	0.0514141	21
>tr|Q5BK33|Q5BK33_RAT p55 protein OS	0.601524	1.02554	1	0.235152	1.01761	1	-0.236882	1.0042	1	-0.0673813	1.0097	1
>tr|Q5D002|Q5D002_RAT Sptbn1 protein (Fragment) OS	0.383638	1.021	8	-0.305178	1.01567	8	-0.363775	1.00802	8	0.173673	1.00437	8
>tr|Q5EB55|Q5EB55_RAT Gbe1 protein (Fragment) OS	-0.487814	1.02973	3	0.475094	1.01628	3	0.844571	0.988882	3	0.212908	1.00311	3
>tr|Q5HZB2|Q5HZB2_RAT Aldehyde dehydrogenase 1 family, member L1 OS	0.446055	1.0376	4	0.0209287	0.995825	4	0.347788	1.01087	4	1.40275	0.802963	4
>tr|Q5I0E7|Q5I0E7_RAT Transmembrane emp24 protein transport domain containing 9 OS	0.719529	1.01348	2	-0.082402	0.997013	2	-0.840072	0.989091	2	-0.562944	1.02568	2
>tr|Q5I0K1|Q5I0K1_RAT Pipecolic acid oxidase OS	0.917248	0.99133	1	-0.367215	1.01575	1	-0.662225	1.00944	1	0.395719	1.00565	1
>tr|Q5I0K9|Q5I0K9_RAT LOC690745 protein (Fragment) OS	1.59034	0.821547	2	-1.56566	0.797172	2	-1.17665	1.02953	2	2.10246	0.414911	2
>tr|Q5I0M1|Q5I0M1_RAT Apolipoprotein H OS	-0.83414	0.997836	2	-2.41811	0.283196	2	-1.52543	0.975236	2	0.505899	1.02407	2
>tr|Q5I0M4|Q5I0M4_RAT Aldo-keto reductase family 1, member C13 OS	-1.13097	0.946443	3	0.745336	1.00479	3	1.5976	0.94249	3	0.36435	1.01143	3
>tr|Q5I287|Q5I287_RAT Germ cell-less homolog 1 (Drosophila), isoform CRA_a OS	-0.673293	1.02128	1	1.09796	0.937335	1	1.1209	1.01318	1	-0.58157	1.01769	1
>tr|Q5I2Z0|Q5I2Z0_RAT Protein kinase C and casein kinase substrate in neurons 3 OS	-1.18285	0.957896	3	-1.82282	0.65961	3	-0.86286	1.00196	3	0.419657	1.00807	3
>tr|Q5J3F5|Q5J3F5_RAT Uncharacterized protein OS	-0.0150875	1.00621	1	0.43741	1.01119	1	1.06641	1.00741	1	0.809137	0.994934	1
>tr|Q5M849|Q5M849_RAT Interferon-induced protein 35 OS	1.04306	0.970558	2	-0.888375	0.979853	2	-0.811625	0.986976	2	1.50656	0.741319	2
>tr|Q5M884|Q5M884_RAT Similar to RIKEN cDNA 1810022C23 OS	-1.1799	0.957954	2	-0.309848	1.01498	2	0.658933	1.00994	2	0.340664	1.01359	2
>tr|Q5M949|Q5M949_RAT Nipsnap homolog 3A (C. elegans) OS	0.108072	1.01385	2	0.686714	1.00499	2	0.826033	0.986178	2	0.208851	1.00246	2
>tr|Q5M963|Q5M963_RAT Cytidine monophosphate N-acetylneuraminic acid synthetase OS	1.00004	0.977279	1	-1.05374	0.959929	1	-1.45575	0.97334	1	0.671862	1.01712	1
>tr|Q5PQK5|Q5PQK5_RAT Radixin OS	-3.24566	0.121133	5	-0.685831	1.00001	5	1.05614	1.01071	5	0.343842	1.01029	5
>tr|Q5PQR0|Q5PQR0_RAT RCG37353, isoform CRA_b OS	0.632155	1.02123	4	-1.09583	0.94054	4	-1.24942	1.02662	4	0.25434	1.00228	4
>tr|Q5PQZ9|Q5PQZ9_RAT NADH dehydrogenase [ubiquinone] 1 subunit C2 OS	1.28899	0.938228	2	0.903082	0.982384	2	0.120717	0.995777	2	0.202885	1.00509	2
>tr|Q5QE80|Q5QE80_RAT Aldehyde oxidase 1 OS	-1.50369	0.850468	1	0.343693	1.01319	1	1.45901	0.979406	1	-0.259714	1.00094	1
>tr|Q5RJN0|Q5RJN0_RAT NADH dehydrogenase (Ubiquinone) Fe-S protein 7 OS	0.381824	1.01759	2	0.444744	1.01327	2	-0.540112	1.00726	2	-1.46414	0.782773	2
>tr|Q5RKI5|Q5RKI5_RAT Flightless I homolog (Drosophila) OS	1.49658	0.842673	1	0.201464	1.02063	1	-0.41521	1.01698	1	0.86627	0.977289	1
>tr|Q5U1Y5|Q5U1Y5_RAT Heterogenous nuclear ribonucleoprotein L OS	-0.4136	1.03629	2	-2.40613	0.283415	2	-2.27647	0.488187	2	-0.56419	1.02417	2
>tr|Q5U1Z9|Q5U1Z9_RAT Metaxin 2 OS	1.10993	0.945758	1	0.255839	1.01507	1	0.103047	0.99041	1	1.06057	0.925343	1
>tr|Q5U214|Q5U214_RAT Small nuclear ribonucleoprotein polypeptide A OS	0.210178	1.01671	2	-0.938942	0.972796	2	-1.63523	0.906303	2	-1.1661	0.875143	2
>tr|Q5U302|Q5U302_RAT Catenin (Cadherin associated protein), alpha 1 OS	0.955782	0.984223	6	0.442827	1.01261	6	-0.154745	1.00073	6	-0.414112	1.00672	6
>tr|Q5U3Z7|Q5U3Z7_RAT Serine hydroxymethyltransferase OS	0.416918	1.0393	6	1.54015	0.79647	6	1.38071	1.0042	6	0.359195	1.01334	6
>tr|Q5XHY0|Q5XHY0_RAT DEAD (Asp-Glu-Ala-Asp) box polypeptide 18 OS	0.625779	1.02213	1	1.22755	0.87323	1	0.479196	1.01212	1	-0.413721	1.00439	1
>tr|Q5XI77|Q5XI77_RAT Annexin A11 OS	0.471685	1.03521	1	0.179673	1.01264	1	-1.03521	0.997401	1	-1.35675	0.823118	1
>tr|Q5XI85|Q5XI85_RAT Aminomethyltransferase OS	-0.35083	1.01637	5	0.589711	1.01034	5	0.813497	0.988753	5	0.00642175	1.00104	5
>tr|Q5XIG9|Q5XIG9_RAT Mitochondrial protein 18 kDa OS	0.948995	0.983851	1	1.0264	0.952916	1	-0.112543	0.992823	1	-0.677942	1.01563	1
>tr|Q5XIH3|Q5XIH3_RAT NADH dehydrogenase (Ubiquinone) flavoprotein 1 OS	-0.423687	1.03943	8	0.234556	1.01819	8	0.334659	1.00739	8	-0.320491	1.0131	8
>tr|Q5XIM3|Q5XIM3_RAT RSA-14-44 protein OS	-0.103033	1.01353	1	0.0947088	0.997411	1	0.079817	0.993189	1	-0.19073	1.0083	1
>tr|Q5XJW6|Q5XJW6_RAT Cfh protein OS	0.510086	1.02847	3	-0.673898	1.00195	3	-2.02182	0.632747	3	-2.36665	0.277624	3
>tr|Q61050|Q61050_MOUSE FBP 23 (Fragment) OS	0.316877	1.01612	1	0.136373	1.00802	1	-0.670953	1.01072	1	-0.973887	0.957325	1
>tr|Q62669|Q62669_RAT Uncharacterized protein OS	-1.5766	0.826192	4	-4.11066	0.00549061	4	-0.349713	1.00924	4	6.35025	0.00172164	4
>tr|Q62670|Q62670_RAT 0 beta-2 globin OS	-0.0730694	1.00624	1	-3.11117	0.0853883	5	-1.3289	1.0067	1	0.876176	0.9727	1
>tr|Q63011|Q63011_RAT Zero beta-globin (Fragment) OS	-1.01843	0.977416	1	-2.83863	0.164489	1	-0.261044	1.00791	1	3.40887	0.0258386	1
>tr|Q63030|Q63030_RAT Rat alpha-smooth muscle actin mRNA. (Fragment) OS	0.0900104	1.01412	1	-0.29456	1.01592	1	-0.662807	1.0087	1	-0.670155	1.01552	1
>tr|Q63125|Q63125_RAT Rat cytochrome P-450b type b (Fragment) OS	-0.47445	1.0371	1	3.63975	0.0268084	1	2.90097	0.189028	1	-2.00121	0.475362	1
>tr|Q63177|Q63177_RAT DNA topoisomerase IIB (Fragment) OS	0.24979	1.01123	1	-0.322791	1.0132	1	0.494	1.00522	1	1.52322	0.746008	1
>tr|Q63223|Q63223_RAT Rat hemoglobin beta-chain (Fragment) OS	1.10525	0.946825	1	-3.11117	0.0853883	5	-1.39497	0.989102	1	1.0131	0.944084	1
>tr|Q63287|Q63287_RAT Ribosomal protein L19 (Fragment) OS	0.127138	1.01896	1	-0.750375	1.00206	1	-0.52314	1.00724	1	0.585038	1.01686	1
>tr|Q63607|Q63607_RAT Alpha-tropomyosin 3 OS				-1.43327	0.850584	4
>tr|Q63910|Q63910_RAT Alpha globin OS	1.62579	0.807547	1	-0.522117	1.0148	1	-0.221931	1.00181	1	2.78642	0.125432	1
>tr|Q68FG2|Q68FG2_MOUSE Spectrin beta 3 OS	0.564295	1.01938	1	0.366461	1.01655	1	0.143469	0.998271	1	0.357354	1.01528	1
>tr|Q68FT7|Q68FT7_RAT Phenylalanyl-tRNA synthetase, beta subunit OS	-0.711047	1.01944	5	-0.145235	1.00899	5	0.113721	0.993804	5	-0.334027	1.01275	5
>tr|Q68FZ8|Q68FZ8_RAT Propionyl coenzyme A carboxylase, beta polypeptide OS	0.132509	1.02044	3	0.557721	1.00695	3	-0.0289308	0.999039	3	0.440923	1.0275	3
>tr|Q68G19|Q68G19_RAT RCG57123 OS	2.07425	0.605235	1	0.862448	0.996461	1	-0.508938	1.01136	1	0.456768	1.02543	1
>tr|Q6AY74|Q6AY74_RAT Similar to 40S ribosomal protein S7 (S8) OS	0.507769	1.0312	1	-0.596265	1.00896	1	-0.201046	1.00214	1	1.44357	0.787455	1
>tr|Q6AYD3|Q6AYD3_RAT Proliferation-associated 2G4 OS	-1.38601	0.895877	5	-1.09754	0.937978	5	-0.379084	1.00945	5	-0.727578	1.02046	5
>tr|Q6AYI1|Q6AYI1_RAT DEAD (Asp-Glu-Ala-Asp) box polypeptide 5 OS	-1.64754	0.802367	16	-1.50297	0.80092	16	-0.496563	1.00529	16	0.305268	1.00941	16
>tr|Q6AYR0|Q6AYR0_RAT Homogentisate 1, 2-dioxygenase OS	-0.500058	1.02673	6	0.760767	1.01517	6	1.43209	0.966189	6	0.685044	1.0258	6
>tr|Q6AYS3|Q6AYS3_RAT Protective protein for beta-galactosidase OS	-0.310009	1.01241	1	0.34428	1.01258	1	-0.159484	1.00139	1	-1.35496	0.825798	1
>tr|Q6AYU5|Q6AYU5_RAT Poly(RC) binding protein 2 OS	0.545135	1.01859	2	-0.624159	1.00601	2	-1.12196	1.0187	2	-0.268889	1.00058	2
>tr|Q6AYW2|Q6AYW2_RAT Phenylalanine hydroxylase OS	0.222454	1.0178	1	1.54807	0.799531	1	1.22897	1.04161	1	-0.313773	1.00741	1
>tr|Q6I7R1|Q6I7R1_RAT Dehydrogenase/reductase (SDR family) member 7 OS	-0.212624	1.01964	5	5.49226	0.00526279	5	5.24489	0.00731873	5	-0.507455	1.02541	5
>tr|Q6IFV0|Q6IFV0_RAT Type I keratin KA11 OS	2.45606	0.36879	1	0.265657	1.01549	1	-1.92577	0.715616	1	-0.415566	1.00514	1
>tr|Q6IMY8|Q6IMY8_RAT Heterogeneous nuclear ribonucleoprotein U OS	-1.11437	0.945059	12	-2.08445	0.462608	12	-1.11088	1.01054	12	0.566358	1.02492	12
>tr|Q6IRH6|Q6IRH6_RAT Slc25a3 protein OS	0.196598	1.02137	1	0.201694	1.02041	1	0.0402936	0.9973	1	-0.0334202	1.00618	1
>tr|Q6IRK4|Q6IRK4_RAT Solute carrier family 37 (Glucose-6-phosphate transporter), member 4 OS	0.000572015	1.00197	2	-0.598057	1.00898	2	-0.762514	0.999716	2	-0.391364	1.00493	2
>tr|Q6MG76|Q6MG76_RAT Superkiller viralicidic activity 2-like (S. cerevisiae) OS	-0.206161	1.01828	4	-0.141585	1.01021	4	0.186878	0.999246	4	0.377265	1.00747	4
>tr|Q6MGD2|Q6MGD2_RAT Uncharacterized protein OS	0.321165	1.02259	1	0.331636	1.01069	1	0.301447	1.00793	1	0.362969	1.01112	1
>tr|Q6P3V9|Q6P3V9_RAT RCG58071, isoform CRA_a OS	-0.213136	1.01916	2	-1.0853	0.937182	2	-2.04432	0.616489	2	-2.24129	0.294588	2
>tr|Q6P513|Q6P513_RAT Hdlbp protein OS	-0.145556	1.02279	1	-0.149738	1.00976	1	-0.273686	1.00656	1	-0.400764	1.00474	1
>tr|Q6P685|Q6P685_RAT Eukaryotic translation initiation factor 2, subunit 2 (Beta) OS	0.760642	1.00561	2	-0.444071	1.01402	2	-1.40511	0.992908	2	-0.923023	0.974934	2
>tr|Q6P762|Q6P762_RAT Mannosidase 2, alpha B1 OS	0.0853934	1.00946	1	-0.291339	1.01516	1	-0.0475434	0.997667	1	0.496897	1.02516	1
>tr|Q6P7A7|Q6P7A7_RAT Ribophorin I OS	-0.735657	1.00665	1	-0.397272	1.01785	1	0.200522	1.00043	1	-0.0129703	1.00199	1
>tr|Q6P7B3|Q6P7B3_RAT Tripartite motif-containing 25 OS	-0.180245	1.0234	1	-1.02488	0.955151	1	-1.15898	1.03822	1	-0.462332	1.02812	1
>tr|Q6P7R0|Q6P7R0_RAT Coro1b protein OS	0.380386	1.01469	1	-0.847312	0.99354	1	-1.73748	0.846996	1	-0.988162	0.959179	1
>tr|Q6PCS8|Q6PCS8_MOUSE Uncharacterized protein OS	-1.39743	0.903762	1	-1.44439	0.855896	1	-0.0887766	0.991454	1	0.468925	1.02361	1
>tr|Q6PDU7|Q6PDU7_RAT ATP synthase, H+ transporting, mitochondrial F0 complex, subunit G OS	0.799322	1.00785	2	0.845667	0.991378	2	-0.211647	0.999597	2	-0.95555	0.968405	2
>tr|Q6QI16|Q6QI16_RAT LRRGT00192 OS	0.0784535	1.00883	4	-0.569491	1.00985	4	-0.527556	1.00833	4	0.492667	1.0228	4
>tr|Q6QI63|Q6QI63_RAT LRRGT00145 OS	0.414771	1.03882	1	-1.01496	0.953789	1	-1.37902	1.00733	1	-0.0216233	1.00503	1
>tr|Q6TPJ7|Q6TPJ7_RAT S15 ribosomal protein (Fragment) OS	1.37028	0.892946	2	0.356945	1.01286	2	-0.704809	1.01163	2	-0.438323	1.02453	2
>tr|Q6TXJ0|Q6TXJ0_RAT 40S ribosomal protein S8 OS	1.49775	0.850434	5	-0.727013	0.995222	5	-1.08432	1.00755	5	0.829118	0.991048	5
>tr|Q6UAH0|Q6UAH0_MOUSE Olfactory receptor 94 OS	0.089262	1.01276	1	0.044221	0.994504	1	0.253474	1.00669	1	0.426517	1.01082	1
>tr|Q6UPE0|Q6UPE0_RAT Choline dehydrogenase OS	0.320927	1.02284	23	1.39639	0.843279	23	2.05774	0.879247	23	1.20197	1.00652	23
>tr|Q6XD99|Q6XD99_RAT Non-erythroid spectrin beta OS	1.02002	0.980664	24	0.00499664	0.998405	24	-0.11964	0.996717	24	0.893781	0.972931	24
>tr|Q71DI1|Q71DI1_RAT Dermcidin OS	-0.372759	1.01578	1	-1.43412	0.854952	1	0.449188	1.0214	1	2.71136	0.143186	1
>tr|Q7M0F1|Q7M0F1_RAT Glutathione transferase 3 (Fragments) OS	2.24511	0.487563	2	2.21114	0.382487	2	0.603499	1.00919	2	-0.433374	1.01652	2
>tr|Q7M0F4|Q7M0F4_MOUSE Glutathione transferase class mu chain Yb2 (Fragments) OS	0.971707	0.988805	2	1.12931	0.929332	2	0.0215294	0.998794	2	-0.91276	0.971627	2
>tr|Q7M0F7|Q7M0F7_RAT Glutathione transferase class alpha chain 10 (Fragments) OS	-0.143457	1.02185	1	-1.43243	0.851934	1	-0.270102	1.00613	1	1.87278	0.551246	1
>tr|Q7TMB1|Q7TMB1_RAT Aa1011 OS	-0.934879	0.982432	1	-1.24326	0.864404	1	0.135891	0.996045	1	1.07846	0.917638	1
>tr|Q7TNA8|Q7TNA8_RAT L-lactate dehydrogenase OS	3.03585	0.165302	1	3.67723	0.023162	1	1.99714	0.653392	1	1.15771	0.879609	1
>tr|Q7TP42|Q7TP42_RAT Ab2-292 OS	0.836631	0.997351	1	0.534108	1.01408	1	-0.618189	1.02379	1	-0.846956	0.982864	1
>tr|Q7TP91|Q7TP91_RAT Ab1-205 OS	-0.32391	1.02739	1	-0.577282	1.01124	1	0.0788166	0.992091	1	0.657028	1.01981	1
>tr|Q7TQ85|Q7TQ85_RAT Ac1164 OS	-1.38361	0.894005	2	0.854866	0.987475	2	1.85107	0.734678	2	0.143072	1.00506	2
>tr|Q7TQ86|Q7TQ86_RAT Ac1158 OS	-0.604648	1.02513	1	-0.621655	1.00344	1	-0.144955	1.00111	1	-0.00782826	1.00177	1
>tr|Q7TQ88|Q7TQ88_RAT Ac1075 (Fragment) OS	-0.123307	1.01821	1	-0.124491	1.00103	1	0.689028	1.01147	1	1.16531	0.87243	1
>tr|Q7TRV6|Q7TRV6_MOUSE MCG17085 OS	-0.00684275	1.00242	1	0.223355	1.0169	1	0.135988	0.995959	1	-0.175937	1.00373	1
>tr|Q80WJ5|Q80WJ5_MOUSE Putative T7-like mitochodrial DNA helicase twinkle (Fragment) OS	0.762215	1.00899	1	0.781719	1.01598	1	1.20316	1.03106	1	1.39751	0.805837	1
>tr|Q812C4|Q812C4_RAT Translation initiation factor 4A, isoform 1 (Fragment) OS	0.000348446	1.00093	1	0.349951	1.01341	1	-0.447075	1.02084	1	-1.36441	0.818833	1
>tr|Q8BIQ6|Q8BIQ6_MOUSE MCG23335 OS	-0.791768	1.01392	1	-0.0171951	0.997027	1	2.17583	0.552611	1	2.62797	0.164114	1
>tr|Q8C622|Q8C622_MOUSE Putative uncharacterized protein OS	3.86905	0.0451799	1	0.228223	1.019	1	-0.93365	0.980873	1	3.15647	0.0508507	1
>tr|Q8C6M5|Q8C6M5_MOUSE NALP2 OS	-0.671376	1.02125	1	-0.37903	1.01448	1	-0.199267	1.00013	1	-0.626403	1.01343	1
>tr|Q8C7G6|Q8C7G6_MOUSE Putative uncharacterized protein OS	0.581835	1.02358	1	-0.0713582	0.994317	1	-0.324851	1.00819	1	0.33698	1.01484	1
>tr|Q8CDT9|Q8CDT9_MOUSE MCG1612 OS	-0.440634	1.03489	1	-0.618748	1.00704	1	-0.46514	1.01916	1	-0.347997	1.01374	1
>tr|Q8K2R0|Q8K2R0_MOUSE Farp1 protein (Fragment) OS	0.682456	1.02588	1	-0.466288	1.01372	1	-1.14632	1.04123	1	-0.244684	1.00389	1
>tr|Q8K3Z1|Q8K3Z1_RAT Alpha1,3 galactosyltransferase OS	1.02318	0.981573	1	-0.0737215	0.994217	1	-0.273103	1.00714	1	0.76702	1.01774	1
>tr|Q8SEZ5|Q8SEZ5_RAT Cytochrome c oxidase subunit 2 OS	1.70236	0.763998	2	0.647335	1.00709	2	0.523456	1.00687	2	1.85868	0.559723	2
>tr|Q8SNJ3|Q8SNJ3_RAT MHC class I antigen OS	0.38599	1.02478	1	-2.81939	0.163986	1	-2.59913	0.266609	1	0.334191	1.01258	1
>tr|Q8VD45|Q8VD45_RAT UDP-glucuronosyltransferase 1A5 OS	0.113626	1.01441	1	-0.122259	1.001	1	-0.224085	1.00202	1	-0.0346196	1.00647	1
>tr|Q99MW5|Q99MW5_MOUSE Testis expressed gene 13 OS	0.812754	1.00828	1	0.887934	0.980473	1	0.72477	1.00652	1	0.712799	1.02653	1
>tr|Q99NC6|Q99NC6_RAT Beta-actin FE-3 (Fragment) OS	-1.51302	0.858461	3	-1.29035	0.856442	3	-0.272033	1.0066	3	0.11921	1.00403	3
>tr|Q99NI1|Q99NI1_RAT Nucleoside diphosphate kinase OS	0.164354	1.02427	2	-0.591809	1.00778	2	-0.363329	1.00587	2	0.736793	1.02053	2
>tr|Q9CRN2|Q9CRN2_MOUSE Uncharacterized protein (Fragment) OS	-0.229476	1.0156	1	1.46363	0.825174	1	0.837363	0.983885	1	-1.48884	0.761931	1
>tr|Q9CX86|Q9CX86_MOUSE Uncharacterized protein OS	0.640247	1.01937	1	-1.17085	0.892852	1	-1.91629	0.731408	1	-0.424741	1.00996	1
>tr|Q9CXX2|Q9CXX2_MOUSE Putative uncharacterized protein OS	-0.137846	1.02055	1	0.363294	1.01215	1	0.266802	1.007	1	-0.408911	1.00594	1
>tr|Q9EQS4|Q9EQS4_RAT Cystathionase (Cystathionine gamma-lyase) OS	0.17972	1.02389	2	-0.486827	1.01166	2	-0.413668	1.01586	2	0.441229	1.02715	2
>tr|Q9ER85|Q9ER85_MOUSE Mg310 protein (Fragment) OS	-0.150403	1.02265	1	-0.021596	0.9971	1	0.527949	1.00787	1	0.654699	1.01905	1
>tr|Q9ERK5|Q9ERK5_MOUSE Osteotesticular protein tyrosine phosphatase OS	-0.210618	1.01629	1	0.790315	1.01559	1	0.946162	0.976354	1	-0.0728873	1.00767	1
>tr|Q9JKB7|Q9JKB7_RAT Guanine deaminase OS	0.190017	1.02386	1	0.551553	1.00694	1	0.518117	1.00688	1	0.159567	1.00149	1
>tr|Q9JM28|Q9JM28_MOUSE Olfactory receptor (Fragment) OS	0.4483	1.03801	1	-0.322989	1.01299	1	-0.614106	1.017	1	-0.0629767	1.00551	1
>tr|Q9QX81|Q9QX81_RAT RCG34663, isoform CRA_a OS	-2.68727	0.248232	3	-3.58895	0.0277227	3	-1.8601	0.73546	3	-0.163787	1.00193	3
>tr|Q9WTN7|Q9WTN7_RAT Sterol 12-alpha hydroxylase OS	3.59946	0.0753465	2	2.09337	0.452595	2	-1.37081	1.00408	2	-1.97742	0.493307	2
>tr|Q9WVJ6|Q9WVJ6_RAT Tissue-type transglutaminase OS	-0.723896	1.01166	9	-0.120707	0.999041	9	0.0472831	0.995977	9	-0.311405	1.00815	9
>tr|Q9WVP3|Q9WVP3_MOUSE Glucosidase II alpha-subunit (Fragment) OS	1.17202	0.95895	1	1.31068	0.862065	1	-0.0738699	0.992381	1	-0.796766	1.00312	1
>tr|Q9WVT5|Q9WVT5_RAT Sterol 12alpha-hydroxylase P450 OS	3.00737	0.167637	4	1.51588	0.810291	4	-0.668264	1.01166	4	-0.592024	1.01515	4

## Sheet: Column description
Protein	Fasta identifier of the protein, uniprot accession number and protein name
Zq	Standardized protein quantitation (Navarro et al. 2014)
FDRq	False discovery rate at the protein level (Navarro et al. 2014)
Peptides per protein	number of peptides detected per protein during the analysis
	Reference
	Navarro, P., M. Trevisan-Herraz, E. Bonzon-Kulichenko, E. Núñez, P. Martínez-Acedo, D. Pérez-Hernández, I. Jorge, R. Mesa, E. Calvo, M. Carrascal, M. Hernáez, F. García, J. A. Bárcena, K. Ashman, J. Abián, C. Gil, J. M. Redondo and J. Vázquez (2014). "General Statistical framework for quantitative proteomics by stable isotope labeling." J. Proteome Res., 2014, 13 (3), pp 1234–1247.
