# Supplementary figures and images for: Aging Induces Hepatic Oxidative Stress and Nuclear Proteomic Remodeling in Liver from Wistar Rats
Source: MDPI journal article supplement (doi:10.3390/antiox10101535), 2021-09-27

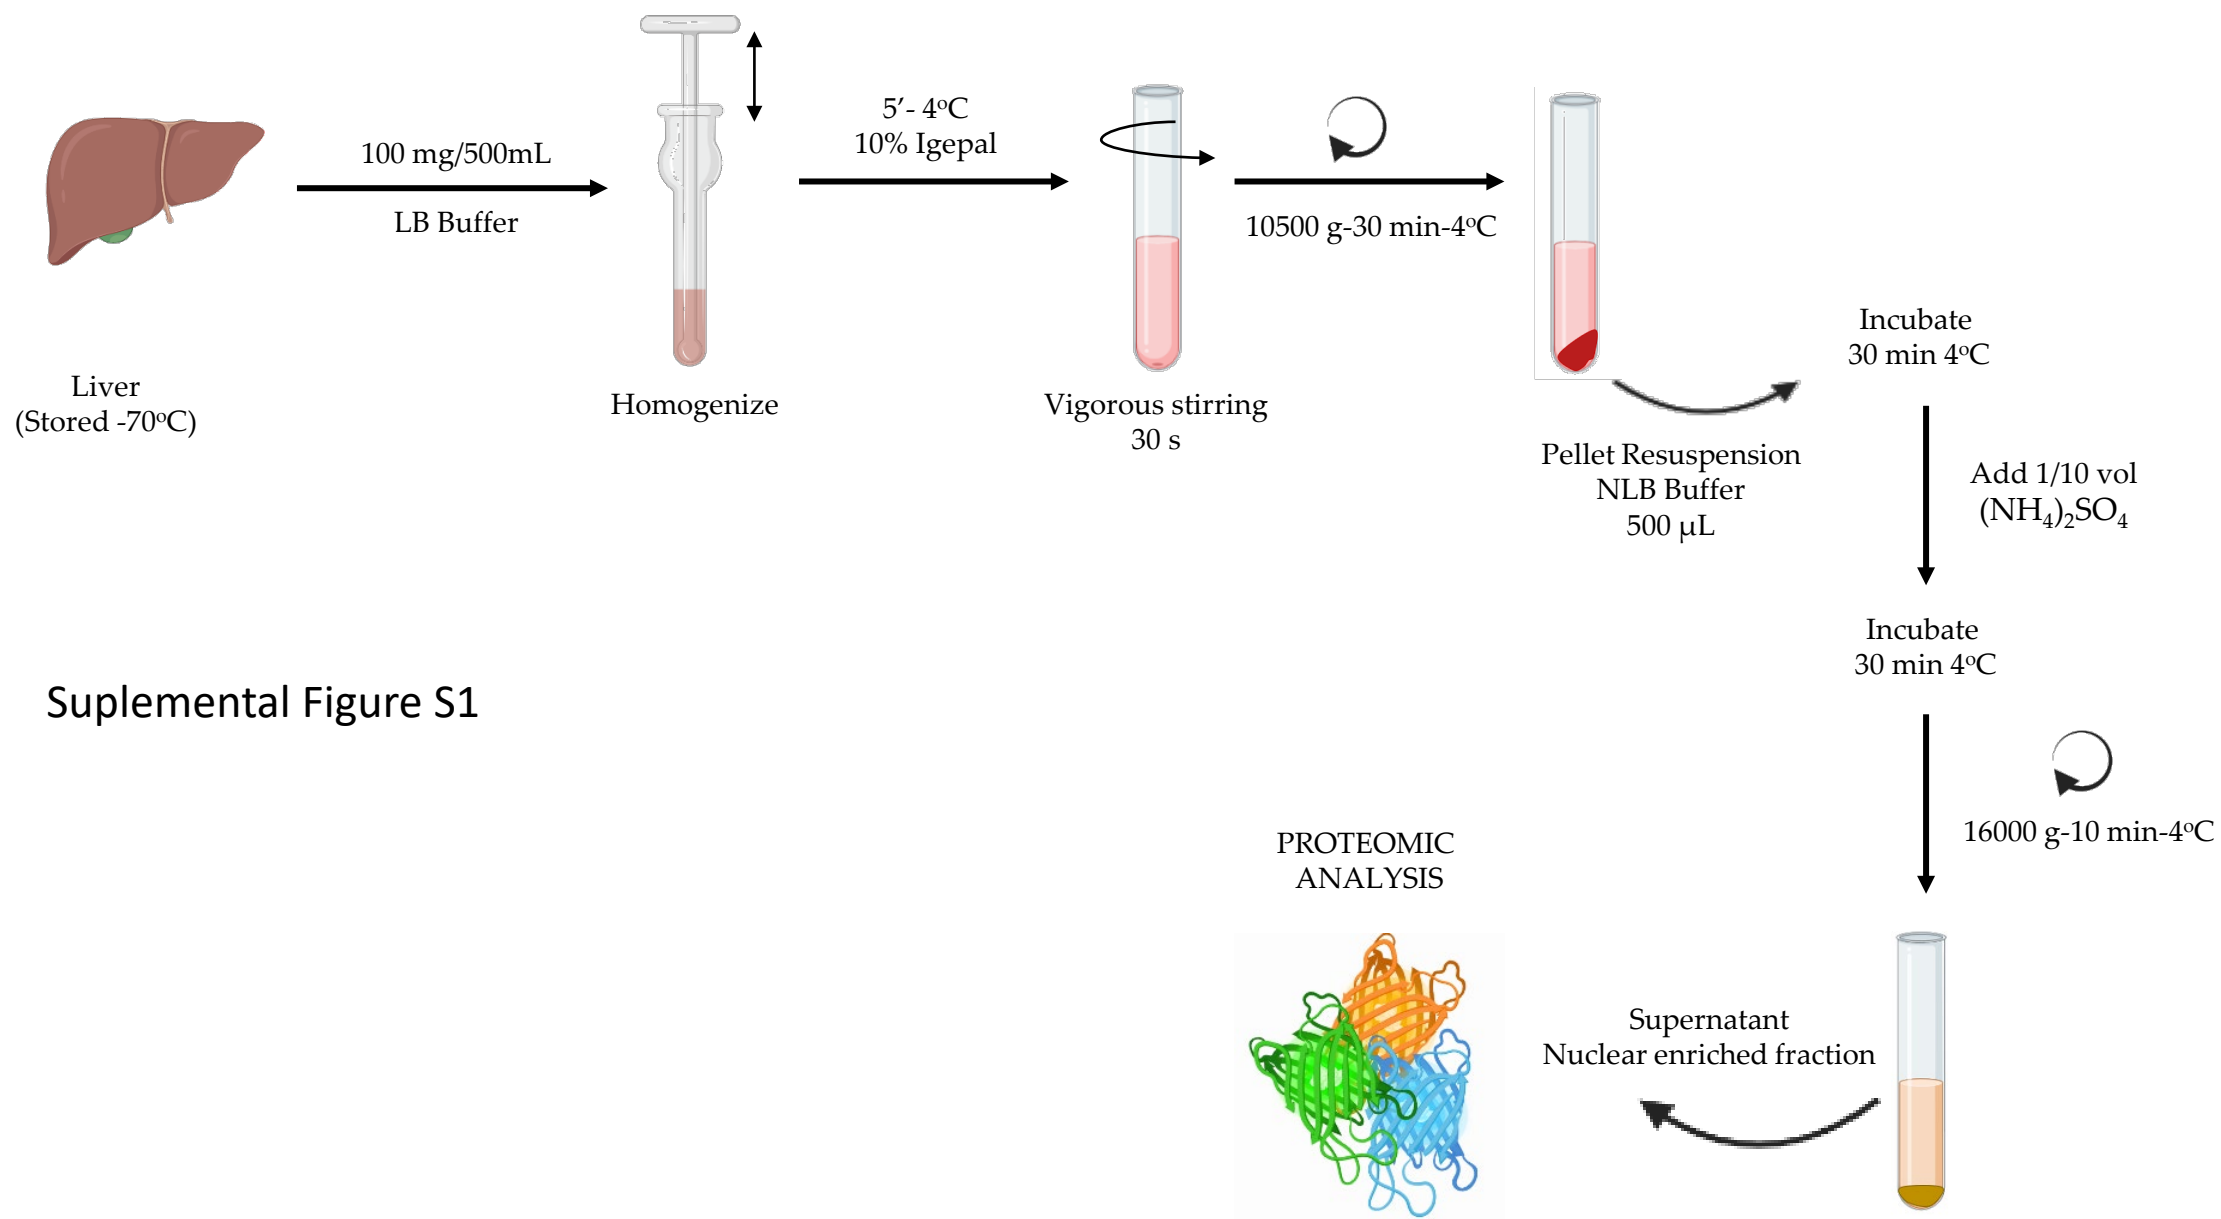

Supplemental Figure S1

Supplement: s1 [file s1]
